# Supplementary material for: Additive-assisted synthesis of α-Kdo glycosides with peracetylated glycosyl ynenoate as a donor
Source: Royal Society of Chemistry journal article supplement (doi:10.1039/d4ob00182f), 2024-01-01

## Supporting Information

### **Dimethylformamide-Modulated Stereoselective Synthesis of $\alpha$ -Kdo Glycosides with Kdo Ynenoate as Donor**

He Miao, Siqian Lu, Hongyu Chen, Jintao Shang, Jibin Zheng and You Yang\*

Shanghai Frontiers Science Center of Optogenetic Techniques for Cell Metabolism,  
Shanghai Key Laboratory of New Drug Design, Engineering Research Center of  
Pharmaceutical Process Chemistry, Ministry of Education, School of Pharmacy, East  
China University of Science and Technology, 130 Meilong Road, Shanghai 200237,  
China. \*E-mail: yangyou@ecust.edu.cn

## Contents

|                                                                    | Page |
|--------------------------------------------------------------------|------|
| 1. General information                                             | S3   |
| 2. Experimental details and characterization data of new compounds | S3   |
| 3. References                                                      | S22  |
| 4. Copies of spectra for all new compounds                         | S23  |

**1. General Information.** All reactions were performed with anhydrous solvents in oven-dried glassware with magnetic stirring under argon or nitrogen unless otherwise stated. The chemicals were purchased as reagent grade and used without further purification unless otherwise noted. Dry dichloromethane was distilled over calcium hydride prior to use. Anhydrous DMF (Extra dry) was purchased from Acros Co. The boiling range of petroleum ether (PE) used as fluent in column chromatography was 65-80 °C. Analytical thin layer chromatography (TLC) was conducted on precoated plates of silica gel (0.25-0.3 mm, Shanghai, China). The TLC plates were visualized by exposure to UV light or by staining with a sulfuric acid-ethanol solution. Silica gel column chromatography was performed on silica gel AR (100-200 mesh, Shanghai, China). Optical rotations (OR) were measured with a Rudolph Research Analytical Autopol I automatic polarimeter. NMR spectra were recorded with a Bruker Avance III 400 spectrometer. The  $^1\text{H}$  and  $^{13}\text{C}$  NMR spectra were calibrated against the residual proton and carbon signals of the solvents as internal references ( $\text{CDCl}_3$ :  $\delta_{\text{H}} = 7.26$  ppm and  $\delta_{\text{C}} = 77.2$  ppm). Multiplicities are quoted as singlet (s), broad singlet (br s), doublet (d), triplet (t), quartet (q), doublet of doublets (dd), doublet of doublet of doublets (ddd), doublet of triplets (dt) or multiplet (m). All NMR chemical shifts ( $\delta$ ) were recorded in ppm and coupling constants ( $J$ ) were reported in Hz. High-resolution mass spectra were recorded on ESI-TOF spectrometer.

## 2. Experimental details and characterization data of new compounds

### 2.1. Synthesis of ethyl ((Z)-non-2-en-4-ynoyl 4,5,7,8-tetra-O-acetyl-3-deoxy- $\alpha$ -D-manno-oct-2-ulopyranoside)onate **1**

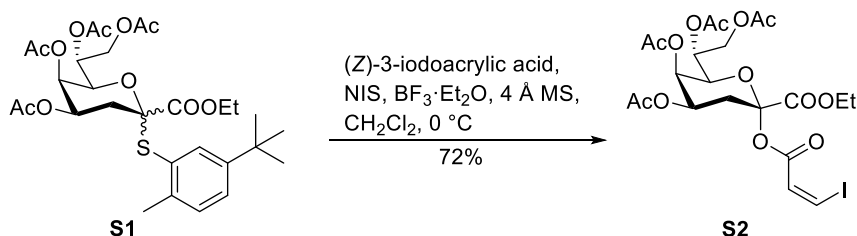

To a solution of **S1**<sup>1</sup> (2.65 g, 4.4 mmol) in anhydrous  $\text{CH}_2\text{Cl}_2$  (30 mL) was added ( $Z$ )-3-iodoacrylic acid (1.8 g, 8.9 mmol) and 4 Å MS (4.5 g). The mixture was stirred

at room temperature for 15 min, and then  $\text{BF}_3 \cdot \text{Et}_2\text{O}$  (1.1 mL, 8.9 mmol) and NIS (2.0 g, 8.9 mmol) were added. After being stirred at room temperature for 1.5 h, the reaction was filtered, diluted with  $\text{CH}_2\text{Cl}_2$  and washed with saturated aqueous  $\text{Na}_2\text{S}_2\text{O}_3$ . The organic layer was dried over  $\text{Na}_2\text{SO}_4$ , filtered and concentrated under reduced pressure. The residue was purified by silica gel column chromatography (petroleum ether/EtOAc: 4/1) to give **S2** (1.95 g, 72%) as a pale yellow foam.  $[\alpha]_D^{25} = +82.0$  (*c* 0.32,  $\text{CHCl}_3$ );  $^1\text{H}$  NMR (400 MHz,  $\text{CDCl}_3$ )  $\delta$  7.70 (d,  $J = 8.8$  Hz, 1 H,  $\text{CH}=\text{CH}$ ), 7.00 (d,  $J = 8.8$  Hz, 1 H,  $\text{CH}=\text{CH}$ ), 5.45–5.39 (m, 2 H, H-5/7), 5.23 (ddd,  $J = 2.4, 3.6, 10.0$  Hz, 1 H, H-4), 4.49 (dd,  $J = 2.4, 12.4$  Hz, 1 H), 4.33–4.26 (m, 2 H), 4.23 (dd,  $J = 1.2, 10.0$  Hz, 1 H), 4.13–4.09 (m, 1 H), 2.33–2.22 (m, 2 H, H-3), 2.11 (s, 3 H), 2.00 (s, 6 H), 1.99 (s, 3 H), 1.29 (t,  $J = 7.2$  Hz, 3 H);  $^{13}\text{C}$  NMR (100 MHz,  $\text{CDCl}_3$ )  $\delta$  170.6, 170.5, 170.2, 169.8, 165.8, 161.6, 128.9, 98.3, 98.1, 70.0, 67.5, 66.2, 64.1, 62.7, 62.2, 31.1, 20.9, 20.8, 14.1; HRMS (ESI)  $m/z$  calcd for  $\text{C}_{21}\text{H}_{27}\text{O}_{13}\text{INa}$  [ $\text{M} + \text{Na}$ ] $^+$  637.0394, found 637.0395.

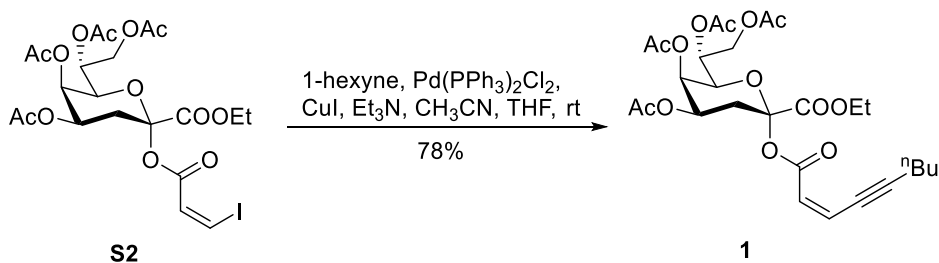

To a solution of **S2** (2.2 g, 3.6 mmol) in anhydrous  $\text{CH}_3\text{CN}$  (30 mL) was added  $\text{CuI}$  (68.8 mg, 0.36 mmol) and  $\text{Pd(PPh}_3)_2\text{Cl}_2$  (126.3 mg, 0.18 mmol). After purged with argon for three times,  $\text{Et}_3\text{N}$  (1 mL, 7.2 mmol) and 1-hexyne (618  $\mu\text{L}$ , 5.4 mmol) were added to the solution. After the mixture was stirred at room temperature overnight, the reaction was diluted with  $\text{CH}_2\text{Cl}_2$  and washed with saturated aqueous  $\text{NH}_4\text{Cl}$ . The organic layer was dried over  $\text{Na}_2\text{SO}_4$ , filtered and concentrated under reduced pressure. The residue was purified by silica gel column chromatography (petroleum ether/EtOAc: 8/1) to afford **1** (1.60 g, 78%) as a yellow syrup.  $[\alpha]_D^{25} = +85.1$  (*c* 0.32,  $\text{CHCl}_3$ );  $^1\text{H}$  NMR (400 MHz,  $\text{CDCl}_3$ )  $\delta$  6.27 (dt,  $J = 2.4, 11.6$  Hz, 1 H,  $\text{CH}=\text{CH}$ ), 6.01 (d,  $J = 11.2$  Hz, 1 H,  $\text{CH}=\text{CH}$ ), 5.38–5.35 (m, 2 H, H-5/7), 5.23 (ddd,  $J$

= 2.0, 3.2, 10.0 Hz, 1 H, H-4), 4.44 (dd,  $J = 1.6, 12.4$  Hz, 1 H), 4.31–4.24 (m, 3 H), 4.15–4.10 (m, 1 H), 2.46 (td,  $J = 2.0, 7.2$  Hz, 2 H), 2.31–2.22 (m, 2 H, H-3), 2.11 (s, 3 H), 2.00 (s, 3 H), 1.98 (s, 6 H), 1.58–1.51 (m, 2 H), 1.47–1.39 (m, 2 H), 1.28 (t,  $J = 7.2$  Hz, 3 H), 0.91 (t,  $J = 7.2$  Hz, 3 H);  $^{13}\text{C}$  NMR (100 MHz,  $\text{CDCl}_3$ )  $\delta$  170.7, 170.6, 170.1, 169.8, 166.2, 161.6, 126.4, 125.4, 106.7, 97.6, 77.9, 69.6, 67.5, 66.3, 64.1, 62.5, 62.3, 31.2, 30.4, 22.2, 20.9, 20.8, 20.7, 19.9, 14.1, 13.7; HRMS (ESI)  $m/z$  calcd for  $\text{C}_{27}\text{H}_{36}\text{O}_{13}\text{Na}$   $[\text{M} + \text{Na}]^+$  591.2054, found 591.2056.

## 2.2. Synthesis of ethyl (adamantan-2-yl 4,5,7,8-tetra-*O*-acetyl-3-deoxy-*D*-manno-oct-2-ulopyranoside)onate **3**

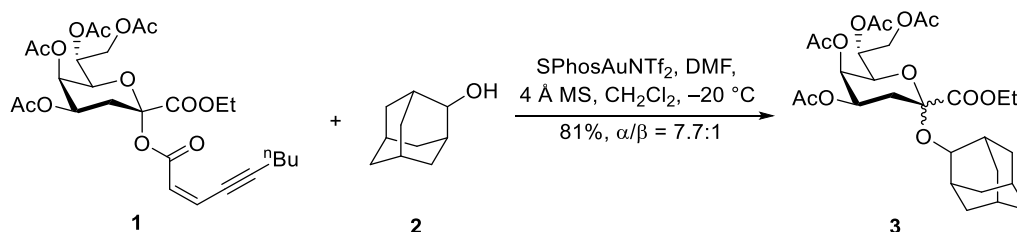

To a stirred mixture of the Kdo donor **1** (28.4 mg, 0.05 mmol), 2-adamantanol **2** (15.2 mg, 0.1 mmol), DMF (23  $\mu\text{L}$ , 0.3 mmol) and freshly activated 4 Å MS (100 mg) in anhydrous  $\text{CH}_2\text{Cl}_2$  (2 mL) at  $-20$  °C, was added dropwise SPhosAuNTf<sub>2</sub> in  $\text{CH}_2\text{Cl}_2$  (0.1 M, 0.25 mL) under argon. After being stirred at  $-20$  °C for 2 h, TLC indicated the disappearance of compound **1**. The mixture was filtered and concentrated *in vacuo*. The residue was purified by silica gel column chromatography (petroleum ether/EtOAc: 6/1) to provide **3**<sup>2</sup> (23.0 mg, 81%,  $\alpha/\beta = 7.7:1$ ) as a colorless syrup.  $^1\text{H}$  NMR (400 MHz,  $\text{CDCl}_3$ )  $\delta$  5.38–5.33 (m, 2 H, H-4 $\alpha$ /5 $\alpha$ /7 $\alpha$ ), 5.26–5.25 (m, 0.13 H, H-5 $\beta$ /7 $\beta$ ), 5.19 (dt,  $J = 2.8, 9.6$  Hz, 1 H, H-4 $\alpha$ /5 $\alpha$ /7 $\alpha$ ), 5.13 (ddd,  $J = 2.4, 4.8, 9.6$  Hz, 0.13 H, H-5 $\beta$ /7 $\beta$ ), 4.87 (ddd,  $J = 3.2, 4.4, 13.2$  Hz, 0.13 H, H-4 $\beta$ ), 4.68 (dd,  $J = 2.8, 12.4$  Hz, 1 H), 4.37 (dd,  $J = 2.4, 12.4$  Hz, 0.13 H), 4.31–4.09 (m, 4.52 H), 3.92 (m, 0.14 H), 3.89 (m, 1 H), 2.40 (dd,  $J = 4.4, 12.4$  Hz, 0.13 H, H-3 $\beta$ ), 2.35–2.31 (m, 1 H, H-3 $\alpha$ ), 2.10–1.92 (m, 17.86 H), 1.83–1.44 (m, 13.78 H), 1.30 (t,  $J = 7.2$  Hz, 3.39 H).

## 2.3. Synthesis of ethyl (*n*-heptyl 4,5,7,8-tetra-*O*-acetyl-3-deoxy-*D*-manno-oct-2-ulopyranoside)onate **5a**

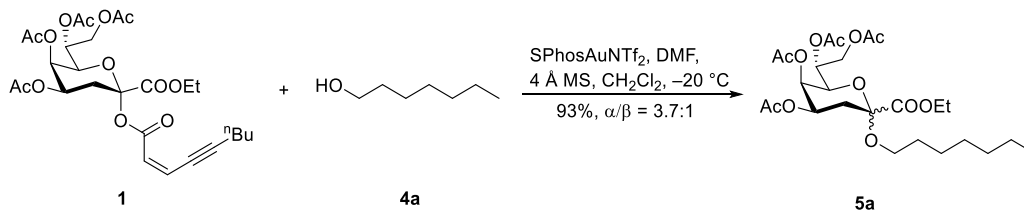

To a stirred mixture of the Kdo donor **1** (28.4 mg, 0.05 mmol), *n*-heptanol **4a** (14  $\mu$ L, 0.1 mmol), DMF (23  $\mu$ L, 0.3 mmol) and freshly activated 4 Å MS (100 mg) in anhydrous  $\text{CH}_2\text{Cl}_2$  (2 mL) at  $-20\text{ }^\circ\text{C}$ , was added dropwise SPhosAuNTf<sub>2</sub> in  $\text{CH}_2\text{Cl}_2$  (0.1 M, 0.2 mL) under argon. After being stirred at  $-20\text{ }^\circ\text{C}$  for 2 h, TLC indicated the disappearance of compound **1**. The mixture was filtered and concentrated *in vacuo*. The residue was purified by silica gel column chromatography (petroleum ether/EtOAc: 6/1) to provide **5a**<sup>2</sup> (24.8 mg, 93%,  $\alpha/\beta = 3.7:1$ ) as a colorless syrup. <sup>1</sup>H NMR (400 MHz,  $\text{CDCl}_3$ )  $\delta$  5.36–5.31 (m, 2 H, H-4 $\alpha$ /5 $\alpha$ /7 $\alpha$ ), 5.27 (br s, 0.27 H, H-5 $\beta$ /7 $\beta$ ), 5.22 (dt,  $J = 2.8, 10.0$  Hz, 1 H, H-4 $\alpha$ /5 $\alpha$ /7 $\alpha$ ), 5.17 (dt,  $J = 3.2, 9.6$  Hz, 0.27 H, H-5 $\beta$ /7 $\beta$ ), 4.87 (ddd,  $J = 3.2, 4.4, 13.2$  Hz, 0.27 H, H-4 $\beta$ ), 4.60 (dd,  $J = 2.4, 12.4$  Hz, 1 H), 4.36–4.35 (m, 0.54 H), 4.28–4.22 (m, 2.54 H), 4.20–4.17 (m, 0.27 H), 4.14 (dd,  $J = 3.6, 12.4$  Hz, 1 H), 4.08 (d,  $J = 10.0$  Hz, 1 H), 3.73 (dt,  $J = 6.4, 9.2$  Hz, 0.27 H), 3.46 (dt,  $J = 6.4, 9.2$  Hz, 1 H), 3.31–3.25 (m, 1.27 H), 2.36 (dd,  $J = 4.4, 12.4$  Hz, 0.27 H, H-3 $\beta$ ), 2.20–2.15 (m, 1 H, H-3 $\alpha$ ), 2.10–1.97 (m, 16.51 H), 1.60–1.53 (m, 2.54 H), 1.34–1.24 (m, 13.97 H), 0.89–0.86 (m, 3.81 H).

#### 2.4. Synthesis of ethyl (*N*-benzyl-benzyloxycarbonyl-5-aminopentyl 4,5,7,8-tetra-*O*-acetyl-3-deoxy- $\alpha$ -D-manno-oct-2-ulopyranoside)onate **5b**

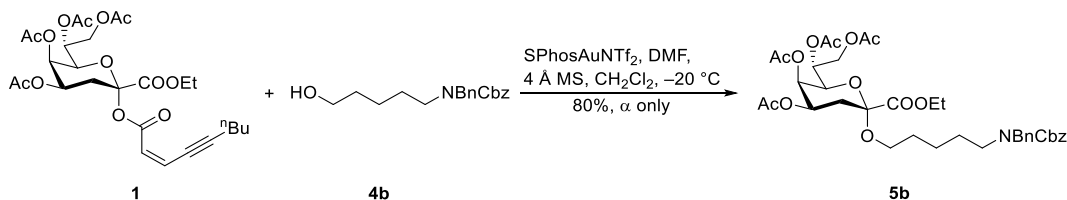

To a stirred mixture of the Kdo donor **1** (28.4 mg, 0.05 mmol), linker **4b**<sup>3</sup> (32.7 mg, 0.1 mmol), DMF (23  $\mu$ L, 0.3 mmol) and freshly activated 4 Å MS (100 mg) in anhydrous  $\text{CH}_2\text{Cl}_2$  (2 mL) at  $-20\text{ }^\circ\text{C}$ , was added dropwise SPhosAuNTf<sub>2</sub> in  $\text{CH}_2\text{Cl}_2$  (0.1 M, 0.2 mL) under argon. After being stirred at  $-20\text{ }^\circ\text{C}$  for 2 h, TLC indicated the

disappearance of compound **1**. The mixture was filtered and concentrated *in vacuo*. The residue was purified by silica gel column chromatography (petroleum ether/EtOAc: 6/1) to provide **5b**<sup>2</sup> (29.8 mg, 80%,  $\alpha$  only) as a yellow syrup. <sup>1</sup>H NMR (400 MHz, CDCl<sub>3</sub>)  $\delta$  7.36–7.17 (m, 10 H), 5.35–5.31 (m, 2 H, H-4/5/7/Cbz), 5.24–5.16 (m, 3 H, H-4/5/7/Cbz), 4.60 (dd,  $J$  = 0.8, 12.0 Hz, 1 H), 4.50 (br s, 2 H), 4.24 (q,  $J$  = 6.8 Hz, 2 H), 4.13 (dd,  $J$  = 3.2, 12.0 Hz, 1 H), 4.07–4.03 (m, 1 H), 3.44 (br s, 1 H), 3.26–3.20 (m, 3 H), 2.16 (dd,  $J$  = 4.0, 12.4 Hz, 1 H, H-3), 2.08–1.97 (m, 13 H), 1.54 (br s, 4 H), 1.33–1.25 (m, 5 H).

## 2.5. Synthesis of ethyl (adamantan-1-yl 4,5,7,8-tetra-*O*-acetyl-3-deoxy- $\alpha$ -D-manno-oct-2-ulopyranoside)onate **5c**

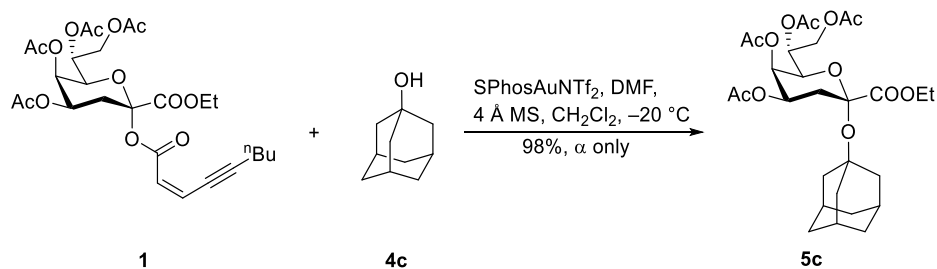

To a stirred mixture of the Kdo donor **1** (28.4 mg, 0.05 mmol), 1-adamantanol **4c** (15.3 mg, 0.1 mmol), DMF (23  $\mu$ L, 0.3 mmol) and freshly activated 4 Å MS (100 mg) in anhydrous CH<sub>2</sub>Cl<sub>2</sub> (2 mL) at –20 °C, was added dropwise SPhosAuNTf<sub>2</sub> in CH<sub>2</sub>Cl<sub>2</sub> (0.1 M, 0.25 mL) under argon. After being stirred at –20 °C for 2 h, TLC indicated the disappearance of compound **1**. The mixture was filtered and concentrated *in vacuo*. The residue was purified by silica gel column chromatography (petroleum ether/EtOAc: 6/1) to provide **5c**<sup>2</sup> (27.9 mg, 98%,  $\alpha$  only) as a colorless syrup. <sup>1</sup>H NMR (400 MHz, CDCl<sub>3</sub>)  $\delta$  5.37–5.32 (m, 2 H, H-4/5/7), 5.22 (dt,  $J$  = 3.2, 9.6 Hz, 1 H, H-4/5/7), 4.66 (dd,  $J$  = 2.8, 12.4 Hz, 1 H), 4.35–4.12 (m, 4 H), 2.18 (dd,  $J$  = 4.4, 12.0 Hz, 1 H, H-3), 2.10 (br s, 3 H), 2.06 (s, 3 H), 2.05 (s, 3 H), 1.98 (s, 3 H), 1.96 (s, 3 H), 1.89 (t,  $J$  = 12.4 Hz, 1 H, H-3), 1.86 (br s, 6 H), 1.63–1.53 (m, 6 H), 1.34 (t,  $J$  = 7.2 Hz, 3 H).

## 2.6. Synthesis of ethyl (cholesteryl 4,5,7,8-tetra-*O*-acetyl-3-deoxy- $\alpha$ -D-manno-

## oct-2-ulopyranoside)onate **5d**

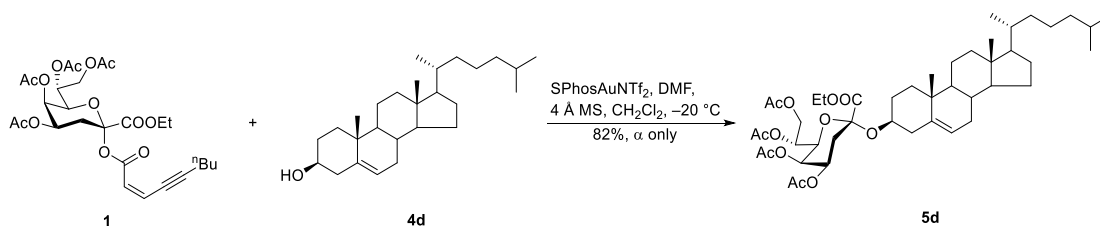

To a stirred mixture of the Kdo donor **1** (28.4 mg, 0.05 mmol), cholesterol **4d** (38.7 mg, 0.1 mmol), DMF (23  $\mu$ L, 0.3 mmol) and freshly activated 4 Å MS (100 mg) in anhydrous CH<sub>2</sub>Cl<sub>2</sub> (2 mL) at -20 °C, was added dropwise SPhosAuNTf<sub>2</sub> in CH<sub>2</sub>Cl<sub>2</sub> (0.1 M, 0.25 mL) under argon. After being stirred at -20 °C for 2 h, TLC indicated the disappearance of compound **1**. The mixture was filtered and concentrated *in vacuo*. The residue was purified by silica gel column chromatography (petroleum ether/EtOAc: 6/1) to provide **5d**<sup>2</sup> (32.9 mg, 82%,  $\alpha$  only) as a colorless syrup. <sup>1</sup>H NMR (400 MHz, CDCl<sub>3</sub>)  $\delta$  5.37–5.33 (m, 2 H, H-5/7), 5.24 (ddd, *J* = 2.8, 4.4, 9.6 Hz, 1 H, H-4), 4.69 (dd, *J* = 2.8, 12.4 Hz, 1 H), 4.29 – 4.17 (m, 3 H), 4.11 (dd, *J* = 4.4, 12.4 Hz, 1 H), 3.51 (dt, *J* = 4.8, 10.8 Hz, 1 H), 2.39–2.26 (m, 2 H), 2.22 (dd, *J* = 4.0, 12.0 Hz, 1 H, H-3), 2.06 (s, 3 H), 2.05 (s, 3 H), 1.98 (s, 3 H), 1.97 (s, 3 H).

## 2.7. Synthesis of ethyl (4,5,7,8-tetra-*O*-acetyl-3-deoxy- $\alpha$ -D-manno-oct-2-uloxy)uronate-(2 $\rightarrow$ 6)-1,2:3,4-di-*O*-isopropylidene- $\alpha$ -D-galactopyranoside **5e**

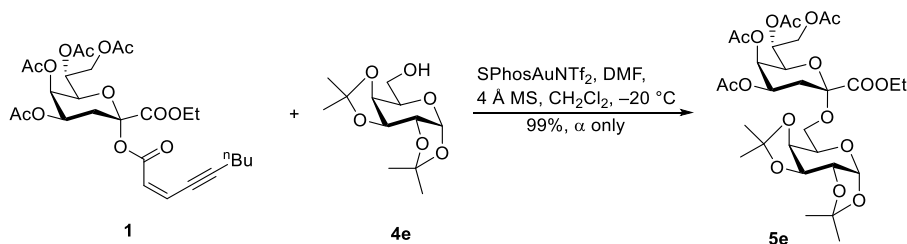

To a stirred mixture of the Kdo donor **1** (28.4 mg, 0.05 mmol), the galactosyl acceptor **4e**<sup>4</sup> (26.0 mg, 0.1 mmol), DMF (23  $\mu$ L, 0.3 mmol) and freshly activated 4 Å MS (100 mg) in anhydrous CH<sub>2</sub>Cl<sub>2</sub> (2 mL) at -20 °C, was added dropwise SPhosAuNTf<sub>2</sub> in CH<sub>2</sub>Cl<sub>2</sub> (0.1 M, 0.25 mL) under argon. After being stirred overnight at -20 °C, TLC indicated the disappearance of compound **1**. The mixture was filtered and concentrated *in vacuo*. The residue was purified by silica gel column



chromatography (petroleum ether/EtOAc: 6/1) to provide **5e**<sup>2</sup> (33.5 mg, 99%,  $\alpha$  only) as a colorless syrup. <sup>1</sup>H NMR (400 MHz, CDCl<sub>3</sub>)  $\delta$  5.51 (d,  $J$  = 4.8 Hz, 1 H, H-1'), 5.36–5.32 (m, 2 H, H-5/7), 5.27 (ddd,  $J$  = 2.0, 5.2, 9.6 Hz, 1 H, H-4), 4.60–4.55 (m, 2 H), 4.34 (d,  $J$  = 9.6 Hz, 1 H), 4.30–4.22 (m, 3 H), 4.19 (dd,  $J$  = 1.6, 8.0 Hz, 1 H), 4.14 (dd,  $J$  = 5.6, 12.4 Hz, 1 H), 3.99–3.96 (m, 1 H), 3.67–3.60 (m, 2 H), 2.20–2.16 (m, 1 H, H-3), 2.09–2.05 (m, 7 H), 2.00 (s, 3 H), 1.96 (s, 3 H), 1.56 (s, 3 H), 1.41 (s, 3 H), 1.33–1.30 (m, 9 H).

## 2.8. Synthesis of ethyl (4,5,7,8-tetra-*O*-acetyl-3-deoxy- $\alpha$ -D-manno-oct-2-uloypyranoside)onate-(2→6)-methyl 2,3,4-tri-*O*-benzyl- $\alpha$ -D-glucopyranoside **5f**

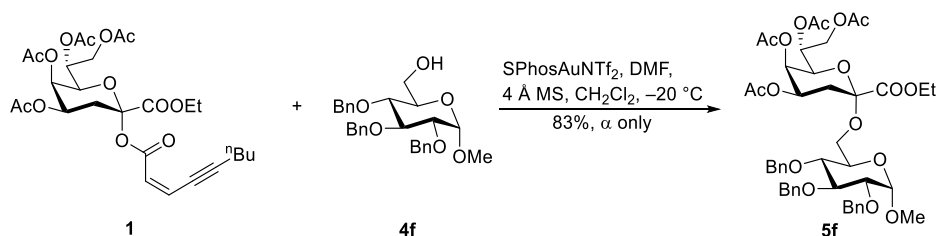

To a stirred mixture of the Kdo donor **1** (28.4 mg, 0.05 mmol), the glucosyl acceptor **4f**<sup>5</sup> (46.4 mg, 0.1 mmol), DMF (23  $\mu$ L, 0.3 mmol) and freshly activated 4 Å MS (100 mg) in anhydrous CH<sub>2</sub>Cl<sub>2</sub> (2 mL) at -20 °C, was added dropwise SPhosAuNTf<sub>2</sub> in CH<sub>2</sub>Cl<sub>2</sub> (0.1 M, 0.25 mL) under argon. After being stirred overnight at -20 °C, TLC indicated the disappearance of compound **1**. The mixture was filtered and concentrated *in vacuo*. The residue was purified by silica gel column chromatography (petroleum ether/EtOAc: 4/1) to provide **5f**<sup>2</sup> (36.6 mg, 83%,  $\alpha$  only) as a white foam. <sup>1</sup>H NMR (400 MHz, CDCl<sub>3</sub>)  $\delta$  7.37–7.24 (m, 15 H), 5.34–5.29 (m, 2 H, H-5/7), 5.18 (ddd,  $J$  = 2.4, 4.4, 9.6 Hz, 1 H, H-4), 4.99 (d,  $J$  = 10.8 Hz, 1 H), 4.92 (d,  $J$  = 10.8 Hz, 1 H), 4.82–4.78 (m, 2 H), 4.67 (d,  $J$  = 12.0 Hz, 1 H), 4.57 (d,  $J$  = 3.6 Hz, 1 H, H-1'), 4.55–4.50 (m, 2 H), 4.20–4.11 (m, 3 H), 4.08 (dd,  $J$  = 4.4, 12.4 Hz, 1 H), 3.99 (t,  $J$  = 9.2 Hz, 1 H), 3.82 (t,  $J$  = 8.4 Hz, 1 H), 3.66 (dd,  $J$  = 1.2, 10.0 Hz, 1 H), 3.48–3.44 (m, 2 H), 3.42 (s, 3 H), 3.24 (dd,  $J$  = 5.2, 6.0 Hz, 1 H), 2.16 (dd,  $J$  = 5.2, 12.4 Hz, 1 H, H-3), 2.07–2.04 (m, 4 H), 1.98 (s, 3 H), 1.96 (s, 3 H), 1.88 (s, 3 H), 1.21 (t,  $J$  = 7.2 Hz, 3 H).

**2.9. Synthesis of ethyl (4,5,7,8-tetra-*O*-acetyl-3-deoxy- $\alpha$ -D-manno-oct-2-uloopyranoside)onate-(2 $\rightarrow$ 6)-5-*tert*-butyl-2-methylphenyl 3,4-di-*O*-benzyl-2-*O*-benzoyl-1-thio- $\beta$ -D-glucopyranose **5g****

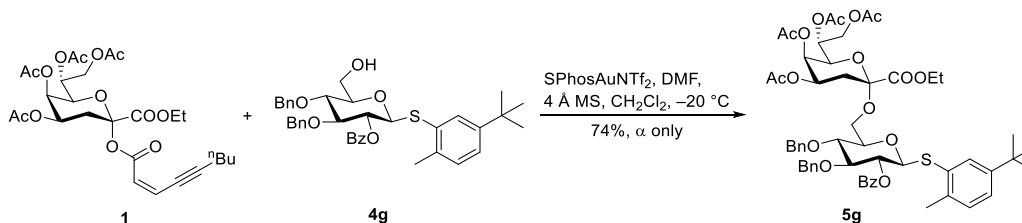

To a stirred mixture of the Kdo donor **1** (28.4 mg, 0.05 mmol), the glucosyl acceptor **4g**<sup>6</sup> (62.7 mg, 0.1 mmol), DMF (23  $\mu$ L, 0.3 mmol) and freshly activated 4 Å MS (100 mg) in anhydrous CH<sub>2</sub>Cl<sub>2</sub> (2 mL) at -20 °C, was added dropwise SPhosAuNTf<sub>2</sub> in CH<sub>2</sub>Cl<sub>2</sub> (0.1 M, 0.3 mL) under argon. After being stirred overnight at -20 °C, TLC indicated the disappearance of compound **1**. The mixture was filtered and concentrated *in vacuo*. The residue was purified by silica gel column chromatography (petroleum ether/EtOAc: 6/1) to provide **5g** (38.6 mg, 74%,  $\alpha$  only) as a white foam.  $[\alpha]_D^{25} = +56.4$  (*c* 0.38, CHCl<sub>3</sub>); <sup>1</sup>H NMR (400 MHz, CDCl<sub>3</sub>)  $\delta$  8.06–8.03 (m, 2 H), 7.61–7.56 (m, 1 H), 7.47–7.43 (m, 3 H), 7.36–7.27 (m, 5 H), 7.19 (dd, *J* = 2.0, 8.0 Hz, 1 H), 7.15–7.10 (m, 6 H), 5.34–5.26 (m, 3 H, H-5/7/1'), 5.22 (ddd, *J* = 2.4, 3.2, 9.6 Hz, 1 H, H-4), 4.94 (d, *J* = 11.2 Hz, 1 H), 4.72 (d, *J* = 11.2 Hz, 1 H), 4.69–4.65 (m, 2 H), 4.63–4.56 (m, 2 H), 4.23–4.16 (m, 2 H), 4.15–4.07 (m, 2 H), 3.87–3.83 (m, 1 H), 3.78 (d, *J* = 10.4 Hz, 1 H), 3.65–3.57 (m, 3 H), 2.30–2.25 (m, 4 H, H-3/ArCH<sub>3</sub>), 2.08 (s, 3 H), 2.05 (m, 1 H, H-3), 2.01 (s, 3 H), 2.00 (s, 3 H), 1.98 (s, 3 H), 1.27 (t, *J* = 6.4 Hz, 3 H), 1.22 (s, 9 H); <sup>13</sup>C NMR (100 MHz, CDCl<sub>3</sub>)  $\delta$  170.7, 170.6, 169.9, 169.8, 166.9, 165.5, 149.8, 138.0, 137.7, 133.4, 133.2, 130.3, 130.1, 130.0, 128.7, 128.5, 128.2, 128.1, 127.9, 125.5, 99.1, 88.6, 84.5, 78.6, 78.1, 75.5, 75.3, 73.0, 68.5, 67.8, 66.6, 64.4, 64.0, 62.2, 62.1, 34.5, 31.9, 31.4, 21.1, 20.9, 20.8, 20.6, 14.2; HRMS (ESI) *m/z* calcd for C<sub>56</sub>H<sub>66</sub>O<sub>17</sub>SNa [M + Na]<sup>+</sup> 1065.3918, found 1065.3917.

**2.10. Synthesis of ethyl (4,5,7,8-tetra-*O*-acetyl-3-deoxy-D-manno-oct-2-uloopyranoside)onate-(2 $\rightarrow$ 4)-4-methoxyphenyl 2,3-*O*-isopropylidene- $\alpha$ -L-**

## rhamnopyranoside **5h**

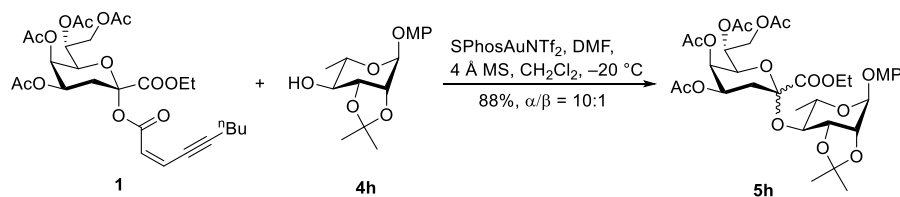

To a stirred mixture of the Kdo donor **1** (28.4 mg, 0.05 mmol), the L-rhamnosyl acceptor **4h**<sup>7</sup> (31.0 mg, 0.1 mmol), DMF (23  $\mu$ L, 0.3 mmol) and freshly activated 4 Å MS (100 mg) in anhydrous CH<sub>2</sub>Cl<sub>2</sub> (1 mL) at -20 °C, was added dropwise SPhosAuNTf<sub>2</sub> in CH<sub>2</sub>Cl<sub>2</sub> (0.1 M, 0.5 mL) under argon. After being stirred overnight at -20 °C, TLC indicated the disappearance of compound **1**. The mixture was filtered and concentrated *in vacuo*. The residue was purified by silica gel column chromatography (petroleum ether/EtOAc: 7/1) to provide **5h**<sup>2</sup> (21.6 mg, 88%,  $\alpha/\beta$  = 10:1) as a white foam. **5h** $\alpha$ : <sup>1</sup>H NMR (400 MHz, CDCl<sub>3</sub>)  $\delta$  6.99–6.97 (m, 2 H), 6.84–6.82 (m, 2 H), 5.56 (s, 1 H, H-1'), 5.38–5.30 (m, 3 H, H-4/5/7), 4.65 (dd,  $J$  = 2.4, 12.4 Hz, 1 H), 4.31–4.20 (m, 6 H), 3.81–3.77 (m, 4 H), 3.63 (dd,  $J$  = 6.0, 9.6 Hz, 1 H), 2.20 (dd,  $J$  = 4.8, 12.8 Hz, 1 H, H-3), 2.11–2.08 (m, 7 H), 1.99 (s, 3 H), 1.97 (s, 3 H), 1.53 (s, 3 H), 1.38 (s, 3 H), 1.33 (t,  $J$  = 7.2 Hz, 3 H), 1.16 (d,  $J$  = 6.4 Hz, 3 H).

## 2.11. Synthesis of ethyl (4,5,7,8-tetra-O-acetyl-3-deoxy- $\alpha$ -D-manno-oct-2-ulo-pyranoside)onate-(2 $\rightarrow$ 3)-methyl 2-O-benzyl-4,6-O-benzylidene- $\alpha$ -D-gluco-pyranoside **5i**

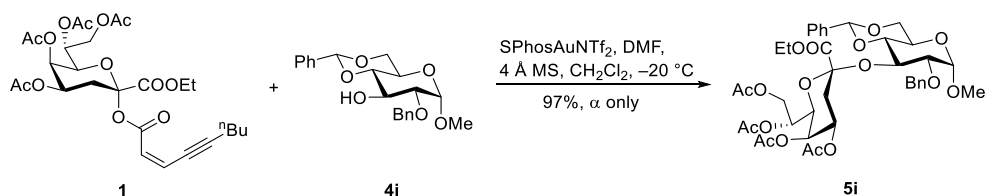

To a stirred mixture of the Kdo donor **1** (28.4 mg, 0.05 mmol), the glucosyl acceptor **4i**<sup>8</sup> (78.9 mg, 0.1 mmol), DMF (23  $\mu$ L, 0.3 mmol) and freshly activated 4 Å MS (100 mg) in anhydrous CH<sub>2</sub>Cl<sub>2</sub> (2 mL) at -20 °C, was added dropwise SPhosAuNTf<sub>2</sub> in CH<sub>2</sub>Cl<sub>2</sub> (0.1 M, 0.2 mL) under argon. After being stirred overnight at -20 °C, TLC indicated the disappearance of compound **1**. The mixture was filtered and concentrated *in vacuo*. The residue was purified by silica gel column

chromatography (petroleum ether/EtOAc: 6/1) to provide **5i** (38.3 mg, 97%,  $\alpha$  only) as a white foam.  $[\alpha]_D^{25} = +52.5$  (*c* 0.32, CHCl<sub>3</sub>); <sup>1</sup>H NMR (400 MHz, CDCl<sub>3</sub>)  $\delta$  7.45–7.30 (m, 10 H), 5.36–5.31 (m, 2 H, H-4/5/7/PhCH), 5.19–5.13 (m, 2 H, H-4/5/7/PhCH), 4.79 (d, *J* = 11.6 Hz, 1 H), 4.65–4.57 (m, 4 H, H-1'), 4.29 (t, *J* = 9.2 Hz, 1 H), 4.20–4.11 (m, 2 H), 3.76 (td, *J* = 4.8, 10.0 Hz, 1 H), 3.66 (t, *J* = 10.0 Hz, 1 H), 3.60–3.56 (m, 2 H), 3.43–3.37 (m, 1 H), 3.34 (s, 3 H), 3.16–3.08 (m, 1 H), 2.20 (dd, *J* = 4.4, 12.8 Hz, 1 H, H-3), 2.09 (s, 3 H), 2.04–2.03 (m, 4 H), 1.95 (s, 6 H), 0.89 (t, *J* = 7.2 Hz, 3 H); <sup>13</sup>C NMR (100 MHz, CDCl<sub>3</sub>)  $\delta$  171.0, 170.6, 170.1, 170.0, 167.7, 137.8, 137.2, 129.4, 128.8, 128.7, 128.4, 126.9, 102.1, 98.6, 81.7, 79.3, 73.8, 71.3, 69.3, 69.2, 68.4, 66.6, 64.8, 62.8, 62.4, 61.2, 55.4, 32.9, 21.0, 20.9, 20.8, 13.9; HRMS (ESI) *m/z* calcd for C<sub>39</sub>H<sub>48</sub>O<sub>17</sub>Na [M + Na]<sup>+</sup> 811.2789, found 811.2791.

## 2.12. Synthesis of ethyl (4,5,7,8-tetra-*O*-acetyl-3-deoxy- $\alpha$ -D-manno-oct-2-ulo-pyranoside)onate-(2 $\rightarrow$ 3)-1,2:5,6-di-*O*-isopropylidene- $\alpha$ -D-glucofuranoside **5j**

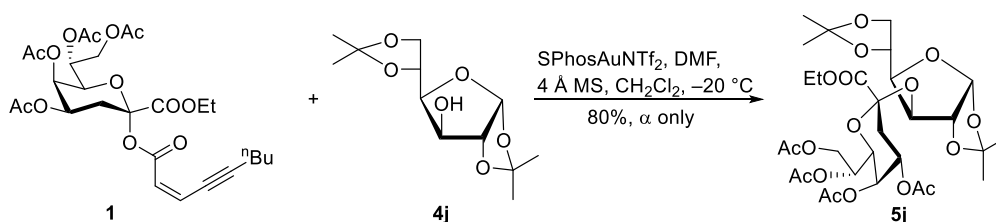

To a stirred mixture of the Kdo donor **1** (28.4 mg, 0.05 mmol), the glucofuranosyl acceptor **4j**<sup>9</sup> (26.0 mg, 0.1 mmol), DMF (23  $\mu$ L, 0.3 mmol) and freshly activated 4 Å MS (100 mg) in anhydrous CH<sub>2</sub>Cl<sub>2</sub> (2 mL) at -20 °C, was added dropwise SPhosAuNTf<sub>2</sub> in CH<sub>2</sub>Cl<sub>2</sub> (0.1 M, 0.4 mL) under argon. After being stirred overnight at -20 °C, TLC indicated the disappearance of compound **1**. The mixture was filtered and concentrated *in vacuo*. The residue was purified by silica gel column chromatography (petroleum ether/EtOAc: 6/1) to provide **5j** (27.1 mg, 80%,  $\alpha$  only) as a white foam.  $[\alpha]_D^{25} = +16.7$  (*c* 0.51, CHCl<sub>3</sub>); <sup>1</sup>H NMR (400 MHz, CDCl<sub>3</sub>)  $\delta$  5.92 (d, *J* = 3.6 Hz, 1 H, H-1'), 5.39 (br s, 1 H, H-5/7), 5.27 (ddd, *J* = 3.2, 4.8, 12.4 Hz, 1 H, H-5/7), 5.18 (ddd, *J* = 2.8, 4.0, 9.2 Hz, 1 H, H-4), 4.78 (dd, *J* = 2.8, 12.4 Hz, 1 H), 4.64 (d, *J* = 3.6 Hz, 1 H), 4.35–4.17 (m, 6 H), 4.10–3.99 (m, 3 H), 2.30 (dd, *J* = 4.4, 12.8 Hz, 1 H, H-3), 2.17–2.10 (m, 4 H), 2.08 (s, 3 H), 1.99 (s, 3 H), 1.97 (s, 3 H), 1.49

(s, 3 H), 1.41 (s, 3 H), 1.37–1.34 (m, 6 H), 1.31 (s, 3 H);  $^{13}\text{C}$  NMR (100 MHz,  $\text{CDCl}_3$ )  $\delta$  170.7, 170.5, 170.1, 169.8, 166.4, 112.4, 109.3, 105.1, 100.0, 83.1, 80.9, 79.1, 72.6, 69.5, 68.1, 67.0, 66.3, 64.5, 62.6, 61.7, 31.9, 27.0, 26.9, 26.7, 26.6, 21.0, 20.9, 20.8, 20.7, 14.1; HRMS (ESI)  $m/z$  calcd for  $\text{C}_{30}\text{H}_{44}\text{O}_{17}\text{Na}$   $[\text{M} + \text{Na}]^+$  699.2476, found 699.2475.

**2.13. Synthesis of ethyl (4,5,7,8-tetra-*O*-acetyl-3-deoxy- $\alpha$ -D-manno-oct-2-  
ulopyranoside)onate-(2 $\rightarrow$ 4)-ethyl (*N*-benzyl-benzyloxycarbonyl-5-aminopentyl  
7,8-*O*-carbonyl-3-deoxy- $\alpha$ -D-manno-oct-2-ulopyranoside)onate **7****

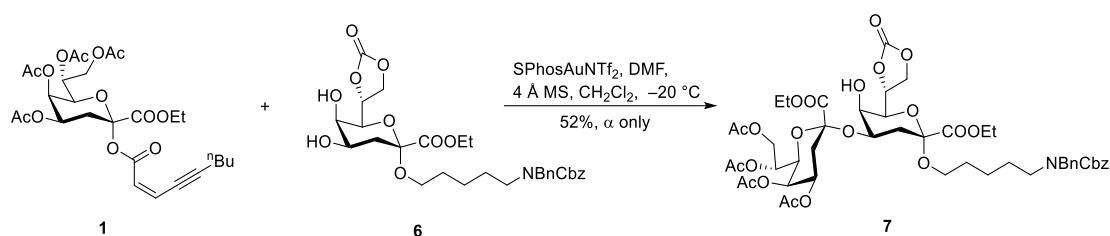

To a stirred mixture of the Kdo donor **1** (56.9 mg, 0.1 mmol), the Kdo acceptor **6**<sup>2</sup> (30.1 mg, 0.05 mmol), DMF (23  $\mu\text{L}$ , 0.3 mmol) and freshly activated 4 Å MS (100 mg) in anhydrous  $\text{CH}_2\text{Cl}_2$  (2 mL) at  $-20\text{ }^\circ\text{C}$ , was added dropwise SPhosAuNTf<sub>2</sub> in  $\text{CH}_2\text{Cl}_2$  (0.1 M, 1.0 mL) under argon. After being stirred overnight at  $-20\text{ }^\circ\text{C}$ , TLC indicated the disappearance of compound **1**. The mixture was filtered and concentrated *in vacuo*. The residue was purified by silica gel column chromatography (petroleum ether/EtOAc: 2/1) to provide **7**<sup>2</sup> (26.5 mg, 52%,  $\alpha$  only) as a colorless syrup.  $^1\text{H}$  NMR (400 MHz,  $\text{CDCl}_3$ )  $\delta$  7.37–7.17 (m, 10 H), 5.38 (br s, 1 H, H-4/5/7/Cbz), 5.27–5.15 (m, 4 H, H-4/5/7/Cbz), 4.89–4.84 (m, 1 H), 4.78–4.71 (m, 2 H), 4.53–4.50 (m, 3 H), 4.29–4.21 (m, 5 H), 4.09 (d,  $J = 9.6$  Hz, 1 H), 3.97–3.83 (m, 2 H), 3.72–3.69 (m, 1 H), 3.41–3.15 (m, 4 H), 2.22 (dd,  $J = 4.8, 13.2$  Hz, 1 H, H-3), 2.09–1.98 (m, 15 H), 1.52–1.50 (m, 4 H), 1.35–1.28 (m, 8 H).

**2.14. Synthesis of ethyl (4,5,7,8-tetra-*O*-acetyl-3-deoxy- $\alpha$ -D-manno-oct-2-  
ulopyranoside)onate-(2 $\rightarrow$ 4)-ethyl (*N*-benzyl-benzyloxycarbonyl-5-aminopentyl  
7,8-*O*-isopropylidene-5-*O*-acetyl-3-deoxy- $\alpha$ -D-manno-oct-2-ulopyranoside)onate**

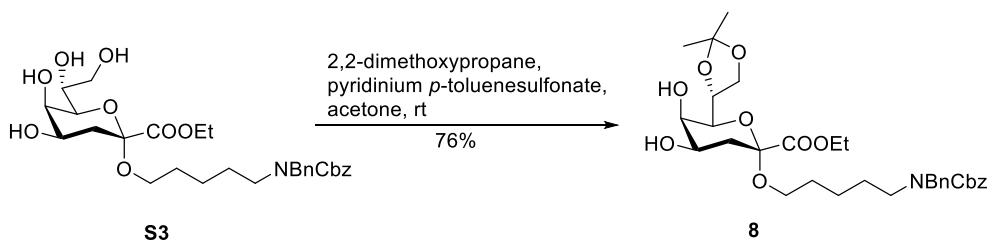

Tetraol **S3** was prepared from compound **5b** in 89% yield upon exposure to  $\text{K}_2\text{CO}_3$  in ethanol according to our previously reported procedure.<sup>2</sup> To a solution of tetraol **S3** (208 mg, 0.36 mmol) in acetone (2.8 mL) at room temperature was added pyridinium *p*-toluenesulfonate (38 mg, 0.15 mmol) and 2,2-dimethoxypropane (79.7  $\mu\text{L}$ , 0.65 mmol). After the mixture was stirred at room temperature for 2 h, the reaction was quenched with saturated aqueous  $\text{NaHCO}_3$ , extracted with  $\text{CH}_2\text{Cl}_2$ , dried over  $\text{Na}_2\text{SO}_4$ , filtered and concentrated *in vacuo*. The residue was purified by silica gel column chromatography (petroleum ether/EtOAc: 2/1) to afford **8** (170 mg, 76%) as a pale yellow syrup.  $[\alpha]_D^{25} = +36.2$  (*c* 0.50,  $\text{CHCl}_3$ );  $^1\text{H}$  NMR (400 MHz,  $\text{CDCl}_3$ )  $\delta$  7.36–7.16 (m, 10 H), 5.17 (d, *J* = 14.0 Hz, 2 H, Cbz), 4.49 (d, *J* = 6.8 Hz, 2 H), 4.39 (dt, *J* = 6.0, 7.6 Hz, 1 H), 4.22 (q, *J* = 7.2 Hz, 2 H), 4.15 (dd, *J* = 6.4, 8.8 Hz, 1 H), 4.05–3.94 (m, 3 H), 3.53–3.46 (m, 1 H), 3.40–3.36 (m, 1 H), 3.25–3.18 (m, 3 H), 2.62 (br s, 1 H), 2.44 (br s, 1 H), 2.14 (dd, *J* = 4.4, 12.4 Hz, 1 H, H-3), 1.83 (t, *J* = 12.4 Hz, 1 H, H-3), 1.57–1.51 (m, 4 H), 1.39 (s, 3 H), 1.36 (s, 3 H), 1.27 (t, *J* = 7.2 Hz, 5 H);  $^{13}\text{C}$  NMR (100 MHz,  $\text{CDCl}_3$ )  $\delta$  168.5, 138.0, 128.7, 128.6, 128.1, 128.0, 127.4, 127.3, 109.6, 99.0, 73.8, 72.9, 67.4, 67.2, 66.9, 65.9, 63.8, 61.9, 50.6, 50.3, 47.2, 46.2, 35.2, 29.4, 28.1, 27.7, 27.1, 25.5, 23.7, 14.3; HRMS (ESI) *m/z* calcd for  $\text{C}_{33}\text{H}_{45}\text{O}_{10}\text{NNa}$  [ $\text{M} + \text{Na}$ ]<sup>+</sup> 638.2941, found 638.2942.

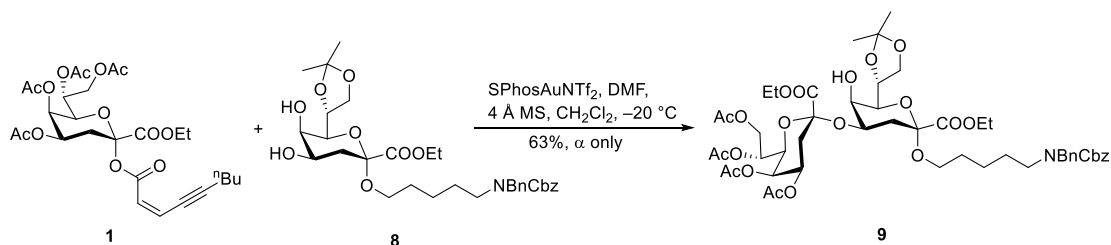

To a stirred mixture of the Kdo donor **1** (56.9 mg, 0.1 mmol), the Kdo acceptor **8** (30.8 mg, 0.05 mmol), DMF (23  $\mu\text{L}$ , 0.3 mmol) and freshly activated 4  $\text{\AA}$  MS (100 mg) in anhydrous  $\text{CH}_2\text{Cl}_2$  (2 mL) at  $-20 \text{ } ^\circ\text{C}$ , was added dropwise  $\text{SPhosAuNTf}_2$  in

CH<sub>2</sub>Cl<sub>2</sub> (0.1 M, 0.8 mL) under argon. After being stirred overnight at -20 °C, TLC indicated the disappearance of compound **1**. The mixture was filtered and concentrated *in vacuo*. The residue was purified by silica gel column chromatography (petroleum ether/EtOAc: 2/1) to provide **9** (32.5 mg, 63%,  $\alpha$  only) as a colorless syrup:  $[\alpha]_D^{25} = +65.3$  (*c* 0.33, CHCl<sub>3</sub>); <sup>1</sup>H NMR (400 MHz, CDCl<sub>3</sub>)  $\delta$  7.36–7.16 (m, 10 H), 5.38 (br s, 1 H, H-4/5/7/Cbz), 5.31–5.26 (m, 1 H, H-4/5/7/Cbz), 5.20–5.14 (m, 3 H, H-4/5/7/Cbz), 4.75 (t, *J* = 9.6 Hz, 1 H), 4.48 (br s, 2 H), 4.40–4.35 (m, 1 H), 4.27–4.09 (m, 8 H), 4.00–3.92 (m, 2 H), 3.75 (br s, 1 H), 3.40–3.16 (m, 5 H), 2.28 (dd, *J* = 4.4, 12.8 Hz, 1 H, H-3), 2.11–2.05 (m, 9 H), 1.98 (s, 3 H), 1.97 (s, 3 H), 1.50 (m, 4 H), 1.35–1.28 (m, 14 H); <sup>13</sup>C NMR (100 MHz, CDCl<sub>3</sub>)  $\delta$  170.8, 170.5, 170.2, 169.8, 167.9, 167.7, 156.8, 156.3, 138.1, 137.1, 136.9, 128.7, 128.6, 128.5, 128.0, 127.9, 127.4, 127.3, 109.3, 98.7, 97.8, 73.7, 72.3, 69.3, 68.9, 68.0, 67.3, 67.1, 66.3, 64.5, 64.4, 63.6, 62.6, 61.9, 61.6, 50.6, 50.3, 47.2, 46.3, 33.2, 32.4, 29.3, 28.1, 27.6, 27.0, 25.5, 23.5, 20.9, 20.8, 20.7, 14.3, 14.0; HRMS (ESI) *m/z* calcd for C<sub>51</sub>H<sub>69</sub>O<sub>21</sub>NNa [M + Na]<sup>+</sup> 1054.4260, found 1054.4261.

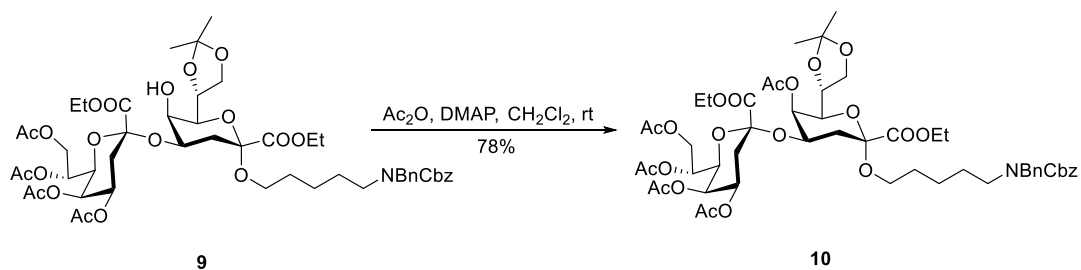

To a solution of compound **9** (26.8 mg, 0.026 mmol) in anhydrous CH<sub>2</sub>Cl<sub>2</sub> (0.5 mL) were added DMAP (3.5 mg, 0.03 mmol) and acetic anhydride (11  $\mu$ L, 0.12 mmol) at room temperature. After the mixture was stirred for 1 h, the reaction was quenched with saturated aqueous NaHCO<sub>3</sub>. The mixture was then extracted with CH<sub>2</sub>Cl<sub>2</sub> and dried over Na<sub>2</sub>SO<sub>4</sub>. After filtration, the mixture was concentrated *in vacuo*. The residue was purified by silica gel column chromatography (petroleum ether/EtOAc: 1/1) to provide **10** (21.8 mg, 78%) as a colorless syrup.  $[\alpha]_D^{25} = +147.8$  (*c* 0.36, CHCl<sub>3</sub>); <sup>1</sup>H NMR (400 MHz, CDCl<sub>3</sub>)  $\delta$  7.36–7.19 (m, 10 H), 5.34 (br s, 1 H, H-4/5/7/5'/Cbz), 5.27 (br s, 1 H, H-4/5/7/5'/Cbz), 5.23–5.13 (m, 4 H, H-4/5/7/5'/Cbz), 4.75–4.72 (m, 1 H), 4.64–4.59 (m, 1 H), 4.50 (br s, 2 H), 4.34–4.22 (m, 4 H), 4.13 (d,

$J = 9.6$  Hz, 1 H), 4.11–4.06 (m, 1 H), 4.01–3.98 (m, 3 H), 3.60 (m, 1 H), 3.38 (m, 1 H), 3.27–3.19 (m, 3 H), 2.19–1.98 (m, 19 H, H-3), 1.53 (m, 4 H), 1.37 (s, 3 H), 1.36–1.32 (m, 5 H), 1.30 (s, 3 H), 1.26 (s, 3 H);  $^{13}\text{C}$  NMR (100 MHz,  $\text{CDCl}_3$ )  $\delta$  170.8, 170.6, 170.4, 170.0, 169.8, 167.8, 166.7, 156.9, 156.3, 139.5, 138.1, 136.9, 128.7, 128.6, 128.5, 128.1, 128.0, 127.5, 127.4, 109.5, 98.7, 97.9, 73.7, 71.7, 69.3, 68.1, 67.3, 67.2, 66.7, 66.6, 66.4, 64.5, 63.8, 63.7, 62.5, 62.0, 61.7, 50.7, 50.3, 47.2, 46.3, 34.3, 31.8, 31.6, 29.9, 29.8, 29.4, 27.0, 25.6, 23.5, 22.9, 21.1, 21.0, 20.9, 20.8, 20.7, 14.4, 14.0; HRMS (ESI)  $m/z$  calcd for  $\text{C}_{53}\text{H}_{71}\text{O}_{22}\text{NNa}$   $[\text{M} + \text{Na}]^+$  1096.4365, found 1096.4366.

**2.15. Synthesis of ethyl (4,5,7,8-tetra-*O*-acetyl-3-deoxy- $\alpha$ -D-manno-oct-2-ulo-pyranoside)onate-(2 $\rightarrow$ 8)-ethyl (*N*-benzyl-benzyloxycarbonyl-5-aminopentyl 4,5-*O*-isopropylidene-7-*O*-acetyl-3-deoxy- $\alpha$ -D-manno-oct-2-ulo-pyranoside)onate**  
**13**

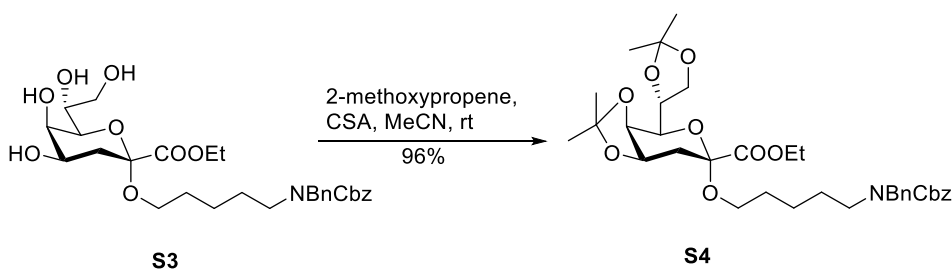

To a solution of tetraol **S3**<sup>2</sup> (100 mg, 0.17 mmol) in anhydrous acetonitrile (3 mL) at room temperature were added 2-methoxypropene (36  $\mu\text{L}$ , 0.38 mmol) and camphorsulfonic acid (8.06 mg, 0.03 mmol). After the mixture was stirred at room temperature for 2 h, the reaction was quenched with  $\text{Et}_3\text{N}$  and concentrated *in vacuo*. The residue was purified by silica gel column chromatography (petroleum ether/ $\text{EtOAc}$ : 6/1) to afford **S4** (110 mg, 96%) as a pale yellow syrup.  $[\alpha]_{\text{D}}^{25} = +12.6$  ( $c$  0.30,  $\text{CHCl}_3$ );  $^1\text{H}$  NMR (400 MHz,  $\text{CDCl}_3$ )  $\delta$  7.36–7.16 (m, 10 H), 5.17 (d,  $J = 13.2$  Hz, 2 H, Cbz), 4.50–4.48 (m, 3 H), 4.40–4.36 (m, 1 H), 4.27–4.18 (m, 3 H), 4.15–4.12 (m, 1 H), 3.97 (dd,  $J = 4.4, 8.4$  Hz, 1 H), 3.59–3.55 (m, 2 H), 3.25–3.14 (m, 3 H), 2.75 (dd,  $J = 4.0, 15.6$  Hz, 1 H, H-3), 1.83 (d,  $J = 15.2$  Hz, 1 H, H-3), 1.52–1.48 (m, 4 H), 1.41 (br s, 5 H), 1.37 (s, 3 H), 1.31–1.25 (m, 9 H);  $^{13}\text{C}$  NMR (100 MHz,  $\text{CDCl}_3$ )  $\delta$  168.8, 156.9, 156.3, 138.1, 137.1, 136.9, 128.7, 128.6, 128.5, 128.1, 127.9, 127.5,



127.4, 127.3, 109.7, 109.3, 97.5, 74.0, 72.2, 71.7, 70.3, 67.3, 67.2, 63.0, 61.6, 50.6, 50.3, 47.3, 46.3, 33.1, 29.5, 27.1, 25.8, 25.5, 25.2, 23.6, 14.3; HRMS (ESI)  $m/z$  calcd for  $C_{36}H_{49}O_{10}NNa$   $[M + Na]^+$  678.3254, found 678.3256.

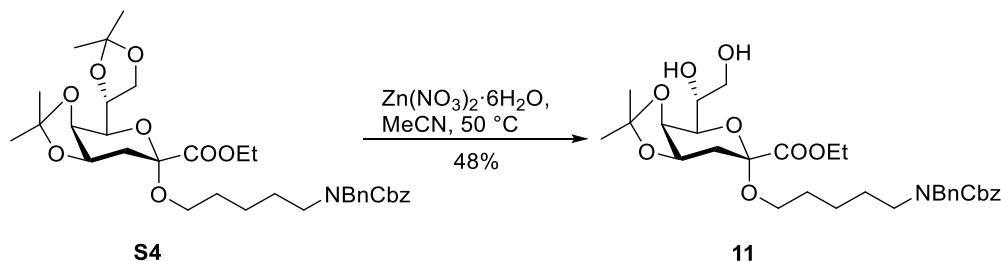

To a solution of **S4** (110 mg, 0.17 mmol) in  $\text{CH}_3\text{CN}$  (0.8 mL) was added  $\text{Zn(NO}_3)_2 \cdot 6\text{H}_2\text{O}$ <sup>10</sup> (160 mg, 0.54 mmol). After being stirred at 50 °C for 2 h, the reaction mixture was diluted with water and the product was extracted with EtOAc. The combined EtOAc phases were washed with brine, dried over  $\text{Na}_2\text{SO}_4$ , filtered and concentrated under reduced pressure. The residue was purified by silica gel column chromatography (petroleum ether/EtOAc: 1/1) to afford **11** (50 mg, 48%) as a pale yellow syrup and **S3** (47 mg, 48%) as a pale yellow syrup.  $[\alpha]_D^{25} = +18.9$  ( $c$  0.33,  $\text{CHCl}_3$ );  $^1\text{H NMR}$  (400 MHz,  $\text{CDCl}_3$ )  $\delta$  7.36–7.15 (m, 10 H), 5.17 (d,  $J = 15.6$  Hz, 2 H, Cbz), 4.54–4.29 (m, 4 H), 4.27–4.18 (m, 2 H), 4.01 (br s, 1 H), 3.85–3.69 (m, 3 H), 3.63–3.50 (m, 1 H), 3.39–3.14 (m, 3 H), 2.62 (dd,  $J = 4.8, 15.2$  Hz, 1 H, H-3), 1.91–1.87 (m, 1 H, H-3), 1.60–1.47 (m, 4 H), 1.43 (s, 3 H), 1.33–1.25 (m, 8 H);  $^{13}\text{C NMR}$  (100 MHz,  $\text{CDCl}_3$ )  $\delta$  168.9, 156.6, 137.9, 136.7, 128.7, 128.6, 128.1, 128.0, 127.9, 127.5, 127.4, 109.6, 97.6, 72.3, 71.0, 70.4, 67.5, 63.8, 63.2, 62.9, 61.8, 50.6, 50.3, 47.3, 46.2, 33.3, 31.6, 31.1, 30.4, 29.9, 29.3, 27.5, 26.2, 25.4, 23.5, 14.3; HRMS (ESI)  $m/z$  calcd for  $C_{33}H_{45}O_{10}NNa$   $[M + Na]^+$  638.2941, found 638.2942.

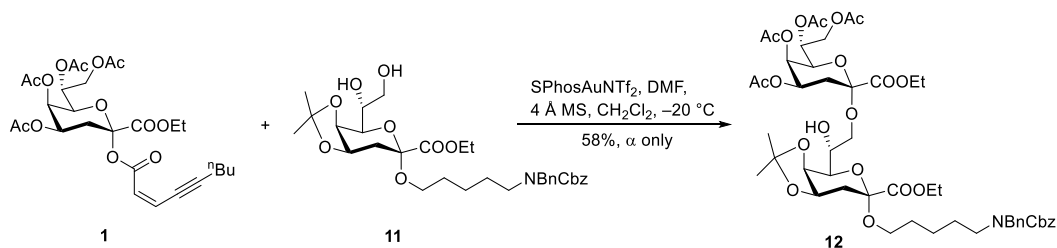

To a stirred mixture of the Kdo donor **1** (56.9 mg, 0.1 mmol), the Kdo acceptor

**11** (30.8 mg, 0.05 mmol), DMF (23  $\mu$ L, 0.3 mmol) and freshly activated 4 Å MS (100 mg) in anhydrous CH<sub>2</sub>Cl<sub>2</sub> (2 mL) at -20 °C, was added dropwise SPhosAuNTf<sub>2</sub> in CH<sub>2</sub>Cl<sub>2</sub> (0.1 M, 1 mL) under argon. After being stirred overnight at -20 °C, TLC indicated the disappearance of compound **1**. The mixture was filtered and concentrated *in vacuo*. The residue was purified by silica gel column chromatography (petroleum ether/EtOAc: 2/1) to provide **12** (29.9 mg, 58%,  $\alpha$  only) as a colorless syrup.  $[\alpha]_D^{25} = +39.5$  (*c* 0.33, CHCl<sub>3</sub>); <sup>1</sup>H NMR (400 MHz, CDCl<sub>3</sub>)  $\delta$  7.35–7.16 (m, 10 H), 5.34 (br s, 1 H, H-5/7), 5.32–5.27 (m, 1 H, H-5/7), 5.23 (ddd, *J* = 2.0, 3.6, 9.6 Hz, 1 H, H-4), 5.15 (d, *J* = 16.4 Hz, 2 H, Cbz), 4.54–4.46 (m, 4 H), 4.35 (dd, *J* = 1.6, 7.2 Hz, 1 H), 4.27–4.09 (m, 7 H), 3.65 (br s, 2 H), 3.59 (br s, 1 H), 3.51 (br s, 1 H), 3.26–3.17 (m, 3 H), 3.02 (br s, 1 H), 2.60 (m, 1 H, H-3'), 2.16 (dd, *J* = 5.2, 12.8 Hz, 1 H, H-3), 2.08 (s, 3 H), 2.06 (s, 3 H), 1.97 (s, 3 H), 1.95 (s, 3 H), 1.89–1.82 (m, 2 H, H-3/3'), 1.51 (m, 4 H), 1.32–1.23 (m, 14 H); <sup>13</sup>C NMR (100 MHz, CDCl<sub>3</sub>)  $\delta$  170.8, 170.6, 170.0, 169.9, 168.6, 167.5, 156.9, 156.3, 138.1, 137.1, 136.9, 132.3, 132.2, 132.1, 128.7, 128.6, 128.5, 128.0, 127.9, 127.4, 127.3, 109.7, 99.0, 97.8, 72.0, 70.3, 70.0, 69.5, 68.6, 67.9, 67.3, 66.5, 65.9, 64.5, 63.3, 62.4, 61.6, 60.6, 50.5, 50.3, 47.3, 46.3, 33.2, 32.0, 29.4, 28.1, 27.6, 26.2, 25.4, 23.7, 21.0, 20.9, 20.8, 14.3, 14.2; HRMS (ESI) *m/z* calcd for C<sub>51</sub>H<sub>69</sub>O<sub>21</sub>NNa [M + Na]<sup>+</sup> 1054.4260, found 1054.4261.

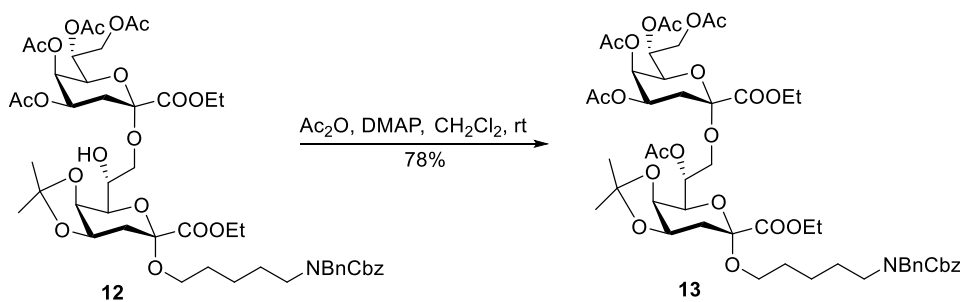

To a solution of compound **12** (29.9 mg, 0.029 mmol) in anhydrous CH<sub>2</sub>Cl<sub>2</sub> (0.5 mL) were added DMAP (3.5 mg, 0.03 mmol) and acetic anhydride (11  $\mu$ L, 0.12 mmol) at room temperature. After the mixture was stirred for 1 h, the reaction was quenched with saturated aqueous NaHCO<sub>3</sub>. The mixture was then extracted with CH<sub>2</sub>Cl<sub>2</sub> and dried over Na<sub>2</sub>SO<sub>4</sub>. After filtration, the mixture was concentrated *in vacuo*. The

residue was purified by silica gel column chromatography (petroleum ether/EtOAc: 1/1) to provide **13** (24.3 mg, 78%) as a colorless syrup.  $[\alpha]_D^{25} = +125.1$  (*c* 0.36, CHCl<sub>3</sub>); <sup>1</sup>H NMR (400 MHz, CDCl<sub>3</sub>) δ 7.36–7.18 (m, 10 H), 5.34 (br s, 1 H, H-4/5/7/5'), 5.32–5.15 (m, 5 H, H-4/5/7/5'/Cbz), 4.63 (d, *J* = 11.6 Hz, 1 H), 4.49 (br s, 2 H), 4.44 (dd, *J* = 4.8, 10.4 Hz, 1 H), 4.28–4.09 (m, 7 H), 4.00 (d, *J* = 10.8 Hz, 1 H), 3.87–3.85 (m, 1 H), 3.79 (dd, *J* = 7.6, 10.8 Hz, 1 H), 3.53 (m, 1 H), 3.25–3.19 (m, 3 H), 2.50 (d, *J* = 14.8 Hz, 1 H, H-3'), 2.20 (dd, *J* = 4.8, 12.4 Hz, 1 H, H-3), 2.12–2.03 (m, 10 H), 1.97 (s, 3 H), 1.95 (s, 3 H), 1.88 (d, *J* = 14.4 Hz, 1 H), 1.51 (m, 4 H), 1.38 (s, 3 H), 1.34–1.25 (m, 11 H); <sup>13</sup>C NMR (100 MHz, CDCl<sub>3</sub>) δ 170.6, 170.5, 170.1, 170.0, 169.9, 168.3, 167.1, 156.9, 156.3, 138.1, 137.1, 128.7, 128.6, 128.5, 128.1, 128.0, 127.9, 127.5, 127.4, 127.3, 109.7, 99.0, 97.9, 71.9, 70.3, 69.9, 68.7, 68.0, 67.3, 66.6, 64.4, 63.4, 63.1, 62.4, 62.1, 61.6, 50.6, 50.3, 47.3, 46.3, 33.4, 31.9, 29.9, 29.5, 28.2, 27.7, 26.3, 25.5, 23.7, 21.2, 20.9, 20.8, 14.3, 14.2; HRMS (ESI) *m/z* calcd for C<sub>53</sub>H<sub>71</sub>O<sub>22</sub>NNa [M + Na]<sup>+</sup> 1096.4365, found 1096.4366.

**2.16. Synthesis of 2-*O*-acetyl-3-*O*-levulinoyl-4,6-di-*O*-benzyl-7-*O*-*tert*-butyl diphenylsilyl-*D*-glycero- $\alpha$ -*D*-manno-heptopyranosyl-(1→3)-2-*O*-acetyl-4-*O*-benzyl-6,7-*O*-isopropylidene-*D*-glycero- $\alpha$ -*D*-manno-heptopyranosyl-(1→5)-methyl (*N*-benzyl-benzyloxycarbonyl-5-aminopentyl 4-*O*-benzyl-7,8-*O*-isopropylidene-3-deoxy- $\alpha$ -*D*-manno-oct-2-ulopyranoside)onate **18****

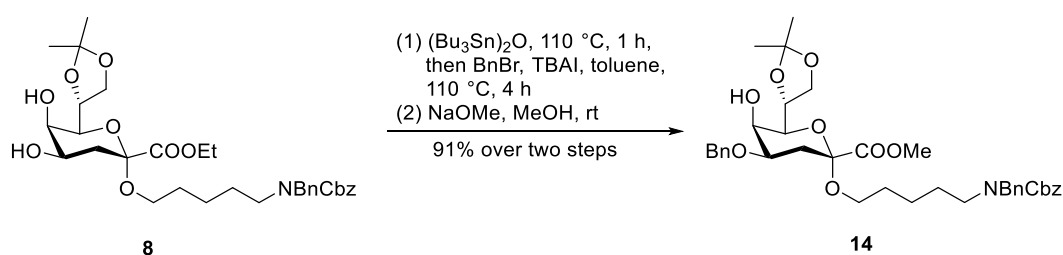

A mixture of compound **8** (61.5 mg, 0.1 mmol), bis(tributyltin) oxide (76.4  $\mu$ L, 0.15 mmol) in toluene (2 mL) was heated at 110 °C for 1 h. After cooling to room temperature, benzyl bromide (21.4  $\mu$ L, 0.18 mmol) and tetrabutylammonium iodide (22 mg, 0.06 mmol) were added, and the mixture was heated at 110 °C for 4 h. The cooling mixture was then filtered and the filtrate was evaporated. The residue was

dissolved in MeOH (5 mL) and sodium methoxide (54 mg, 1 mmol) was added. After being stirred for 2 h, the mixture was neutralized with Amberlite IR120 H<sup>+</sup> resin, filtered, and concentrated *in vacuo*. The residue was purified by silica gel column chromatography (petroleum ether/EtOAc: 3/1) to give **14**<sup>11</sup> (63 mg, 91%) as a colorless syrup. <sup>1</sup>H NMR (400 MHz, CDCl<sub>3</sub>) δ 7.36–7.16 (m, 15 H), 5.17 (d, *J* = 14.8 Hz, 2 H, Cbz), 4.64–4.57 (m, 2 H), 4.51–4.44 (m, 3 H), 4.18–4.14 (m, 2 H), 3.97 (dd, *J* = 4.8, 8.4 Hz, 1 H), 3.90 (m, 1 H), 3.76 (s, 3 H), 3.47 (m, 1 H), 3.39 (m, 1 H), 3.26–3.17 (m, 3 H), 2.27 (br s, 1 H), 2.22 (dd, *J* = 4.4, 12.4 Hz, 1 H, H-3), 1.97 (t, *J* = 12.4 Hz, 1 H, H-3), 1.53 (m, 4 H), 1.41 (s, 3 H), 1.38 (s, 3 H), 1.28–1.25 (m, 2 H).

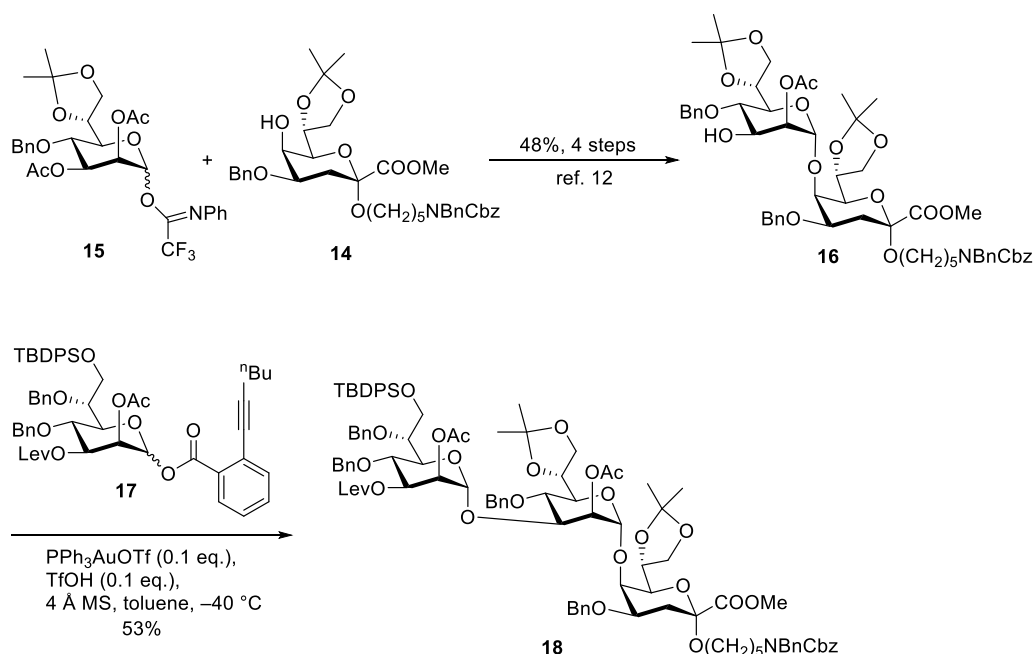

Disaccharide **16** was prepared from *N*-phenyl trifluoroacetimidate **15** and Kdo acceptor **14** according to our previously reported procedure.<sup>12</sup> To a stirred mixture of disaccharide acceptor **16** (21.1 mg, 0.02 mmol), donor **17**<sup>13</sup> (45.8 mg, 0.048 mmol), and freshly activated 4 Å MS (100 mg) in anhydrous toluene (4 mL) at -40 °C were added dropwise a solution of PPh<sub>3</sub>AuOTf in CH<sub>2</sub>Cl<sub>2</sub> (0.1 M, 0.02 mL) and TfOH (0.177 μL, 0.002 mmol) under argon. After being stirred at -40 °C for 12 h, the mixture was quenched by triethylamine, filtered, and concentrated *in vacuo*. The residue was purified by silica gel column chromatography (petroleum ether/EtOAc:

4/1) to afford **18** (19.2 mg, 53%) as a colorless syrup.  $[\alpha]_D^{25} = +30.7$  (*c* 0.34, CHCl<sub>3</sub>); <sup>1</sup>H NMR (400 MHz, CDCl<sub>3</sub>) δ 7.67 (d, *J* = 8.0 Hz, 2 H), 7.57 (dd, *J* = 8.0 Hz, 2 H), 7.48 (t, *J* = 6.4 Hz, 2 H), 7.38–7.05 (m, 32 H), 6.78 (dd, *J* = 7.2, 16.4 Hz, 2 H), 5.35–5.30 (m, 3 H, H-2/3/2'), 5.22 (br s, 1 H, H-1/1'), 5.18–5.14 (m, 2 H, Cbz), 5.05 (m, 1 H, H-1/1'), 4.98 (t, *J* = 11.6 Hz, 1 H), 4.89 (t, *J* = 12.0 Hz, 1 H), 4.80 (dd, *J* = 4.4, 10.0 Hz, 1 H), 4.69–4.65 (m, 2 H), 4.54–4.45 (m, 4 H), 4.34–4.28 (m, 2 H), 4.22–4.17 (m, 3 H), 4.14–4.00 (m, 4 H), 3.87–3.79 (m, 6 H), 3.68 (d, *J* = 8.0 Hz, 4 H), 3.33–3.16 (m, 5 H), 3.07 (t, *J* = 7.6 Hz, 1 H), 2.65–2.40 (m, 4 H), 2.21 (d, *J* = 13.6 Hz, 1 H, H-3''), 2.10 (s, 3 H), 2.04 (dd, *J* = 3.2, 12.0 Hz, 1 H, H-3''), 2.01–1.90 (m, 6 H), 1.48–1.21 (m, 18 H), 1.04 (s, 9 H); <sup>13</sup>C NMR (100 MHz, CDCl<sub>3</sub>) δ 206.4, 206.1, 171.9, 171.7, 170.1, 170.0, 169.9, 168.6, 168.5, 139.7, 139.6, 138.4, 138.2, 138.1, 138.0, 137.8, 136.0, 135.9, 133.7, 133.6, 129.7, 128.7, 128.6, 128.5, 128.4, 128.3, 128.1, 128.0, 127.9, 127.8, 127.7, 127.6, 127.5, 127.4, 127.3, 109.7, 109.2, 99.3 (<sup>1</sup>*J*<sub>C1,H1</sub> = 172.1 Hz), 99.0, 97.6 (<sup>1</sup>*J*<sub>C1,H1</sub> = 172.1 Hz), 76.5, 76.4, 75.0, 74.9, 74.7, 74.5, 74.4, 73.9, 73.8, 73.6, 73.5, 73.1, 72.6, 72.5, 72.2, 71.8, 71.3, 70.5, 70.3, 70.2, 67.9, 67.3, 66.0, 65.8, 64.8, 64.7, 63.7, 62.1, 52.6, 52.5, 50.6, 50.3, 47.2, 46.3, 37.9, 37.8, 33.0, 29.9, 29.4, 28.1, 28.0, 27.0, 26.9, 26.3, 24.9, 24.2, 23.6, 21.1, 21.0, 20.9, 19.5, 19.2; HRMS (ESI) *m/z* calcd for C<sub>102</sub>H<sub>123</sub>O<sub>26</sub>NSiNa [M + Na]<sup>+</sup> 1828.8000, found 1828.7976.

### 3. References

1. X. Mi, Q. Lou, W. Fan, L. Zhuang and Y. Yang, *Carbohydr. Res.* 2017, **448**, 161–165.
2. Q. Lou, Q. Hua, L. Zhang and Y. Yang, *Org. Lett.* 2020, **22**, 981–985.
3. (a) C. Noti, J. L. de Paz, L. Polito and P. H. Seeberger, *Chem. Eur. J.* 2006, **12**, 8664–8686; (b) T. K.-K. Mong, H.-K. Lee, S. G. Duron and C.-H. Wong, *Proc. Natl. Acad. Sci. U. S. A.* 2003, **100**, 797–802.
4. A. T. Khan and E. Mondal, *Synlett* 2003, 694–698.
5. J. Kalikanda and Z. Li, *Carbohydr. Res.* 2011, **346**, 2380–2383.
6. X. Li, C. Li, R. Liu, J. Wang, Z. Wang, Y. Chen and Y. Yang, *Org. Lett.* 2019, **21**, 9693–9698.
7. D. B. Werz and P. H. Seeberger, *Angew. Chem. Int. Ed.* 2005, **44**, 6315–6318.
8. M. Adinolfi, G. Barone, A. Iadonisi, L. Mangoni and M. Schiattarella, *Tetrahedron Lett.* 2001, **42**, 5967–5969.
9. D. Crich and M. Smith, *J. Am. Chem. Soc.* 2001, **123**, 9015–9020.
10. T. K. Pradhan, C. C. Lin and K. K. T. Mong, *Org. Lett.* 2014, **16**, 1474–1477.
11. Y. Yang, C. E. Martin and P. H. Seeberger, *Chem. Sci.* 2012, **3**, 896–899.
12. J. Wang, J. Rong, Q. Lou, Y. Zhu and Y. Yang, *Org. Lett.* 2020, **22**, 8018–8022.
13. J. Wang, Y. Zhang, Y. Zhu, J. Liu, Y. Chen, X. Cao and Y. Yang, *Org. Lett.* 2020, **22**, 8780–8785.

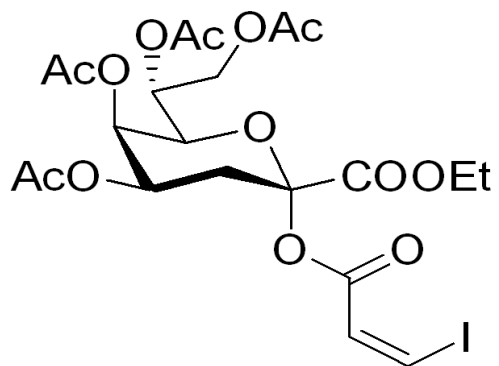

**S2**  
(CDCl<sub>3</sub>, 400 MHz)

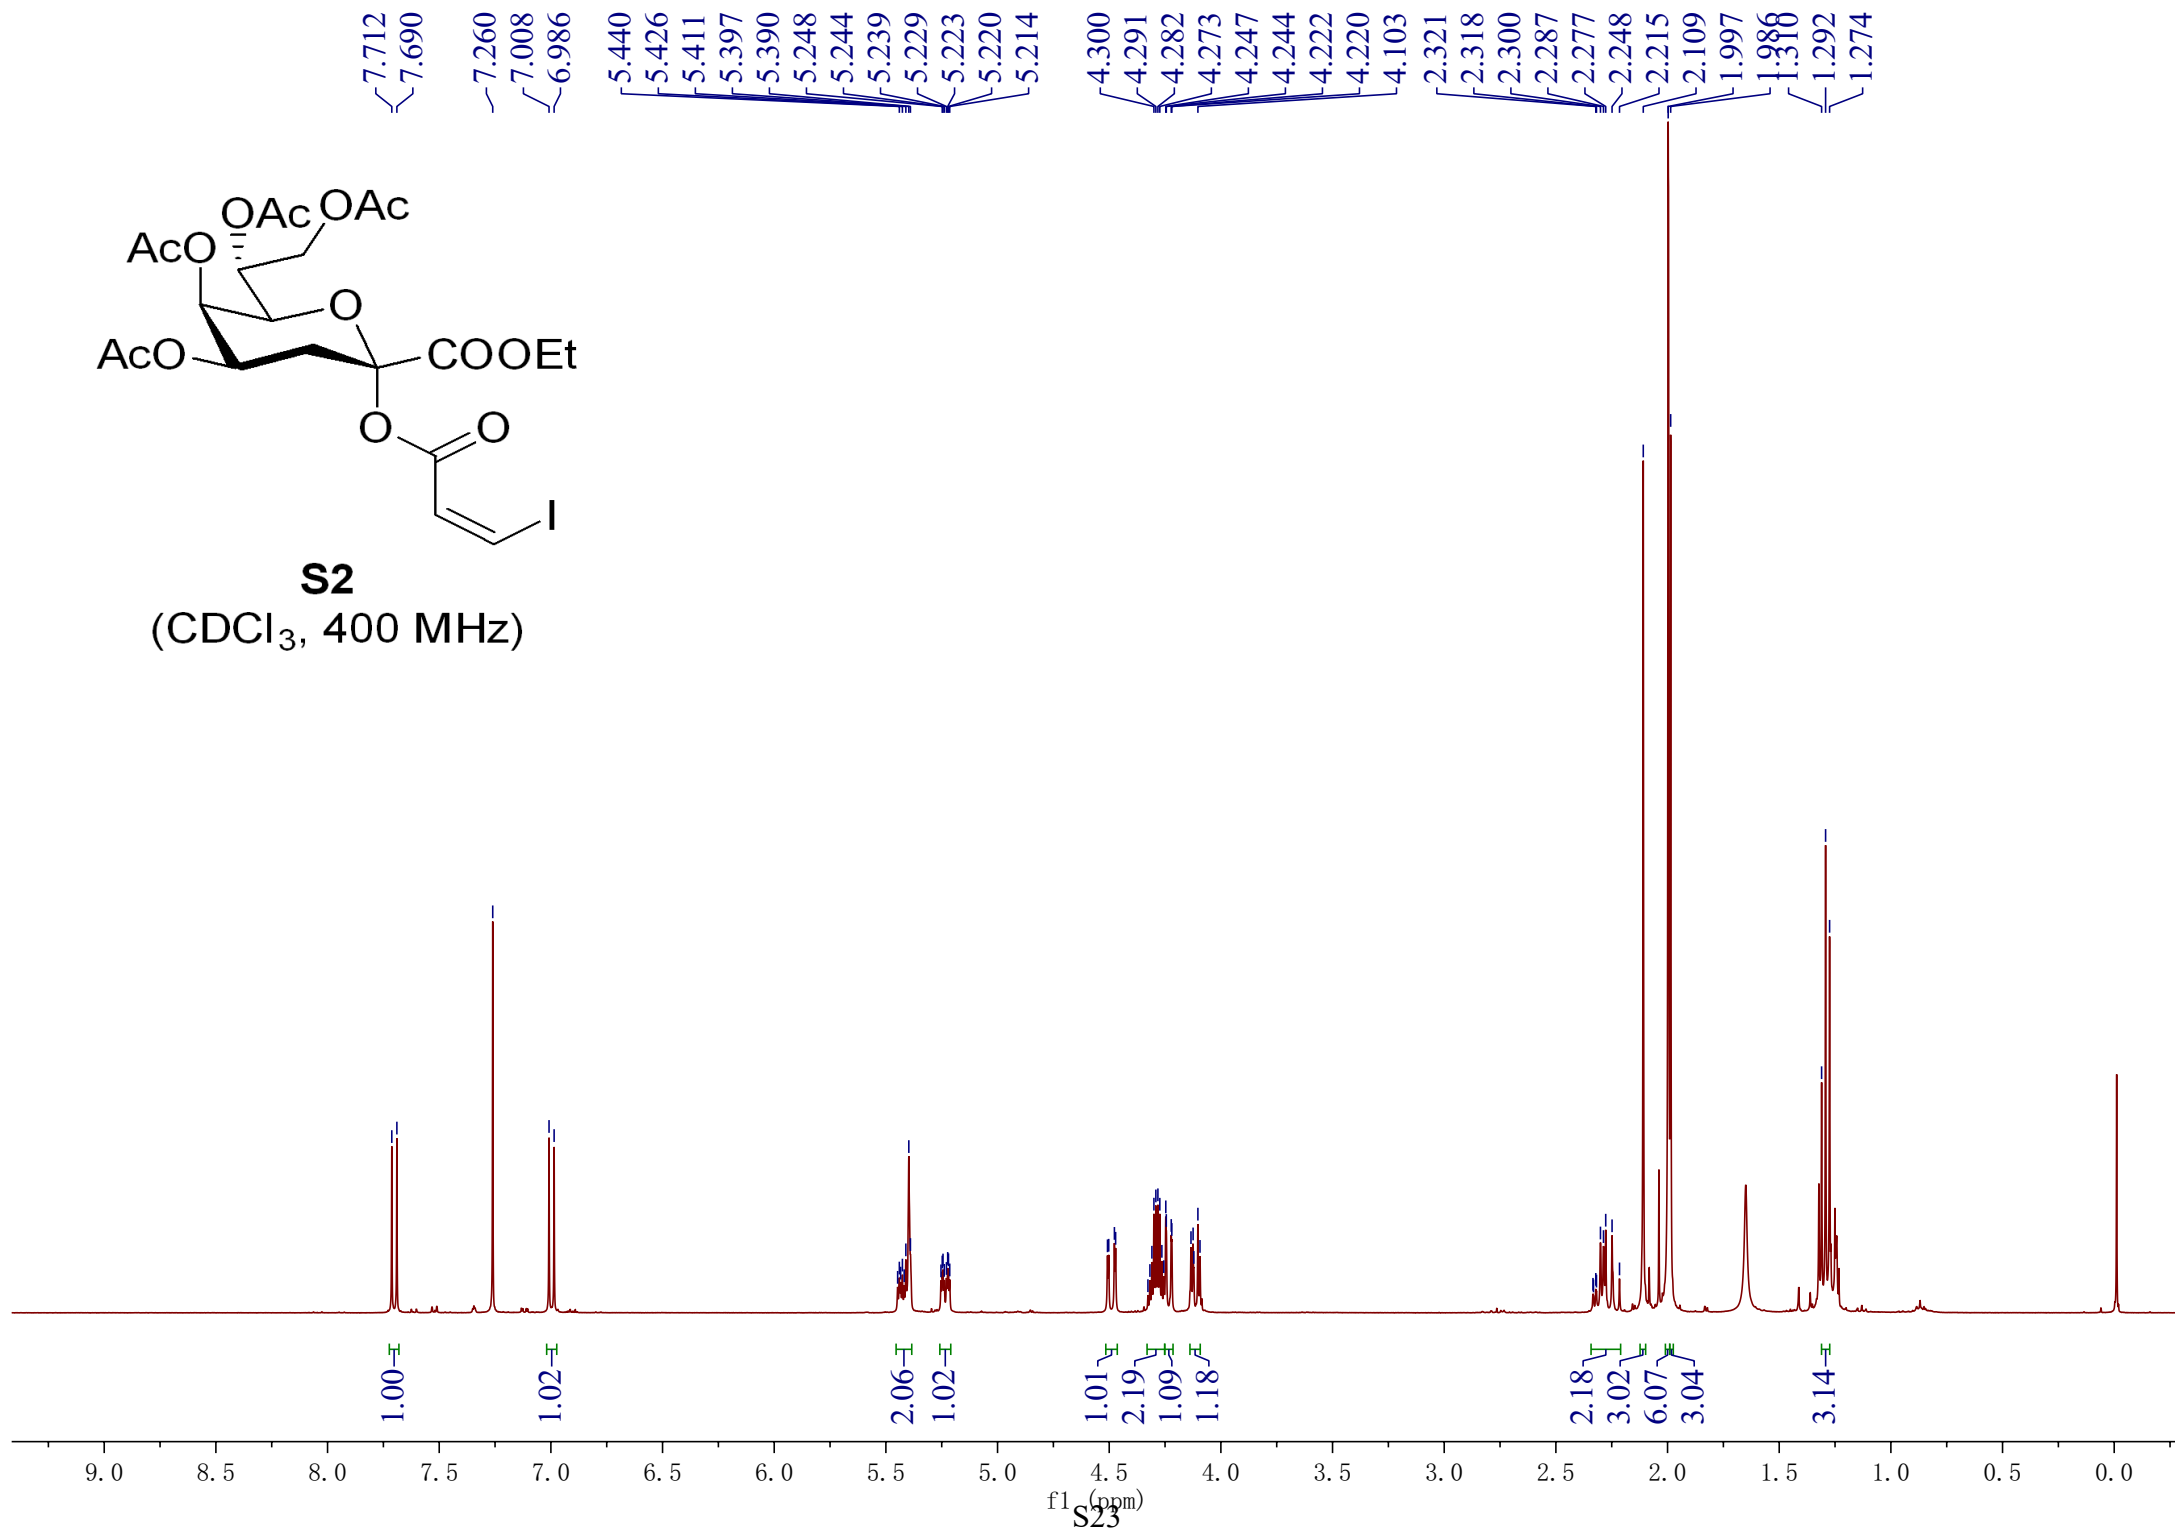

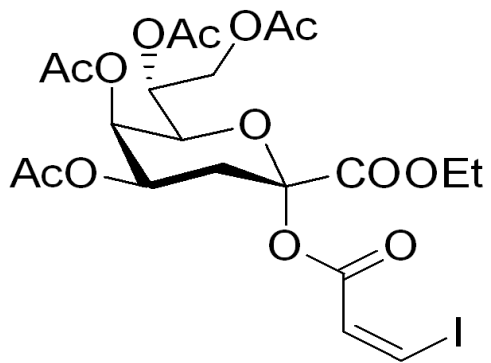

**S2**  
(CDCl<sub>3</sub>, 100 MHz)

170.597  
170.503  
170.154  
169.751  
165.820  
161.609

128.945

98.334  
98.084

77.411  
77.200  
76.988  
70.037  
67.493  
66.160  
64.120  
62.718  
62.207

31.055

20.916  
20.832  
20.814  
14.121

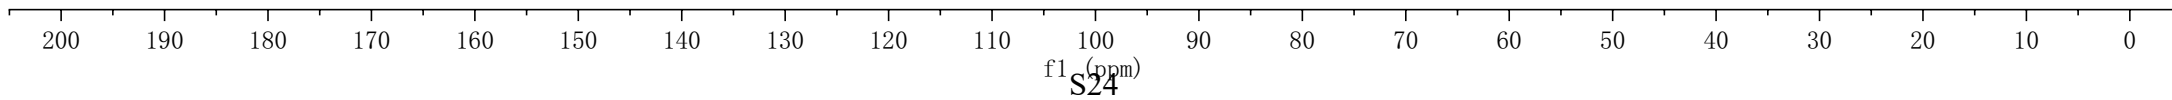



7.260  
6.288  
6.265  
6.259  
6.253  
6.027  
5.999  
5.381  
5.368  
5.355  
5.250  
5.244  
5.237  
5.225  
5.220  
5.212  
4.461  
4.457  
4.430  
4.426  
4.313  
4.296  
4.288  
4.278  
4.261  
4.243  
4.150  
4.141  
4.120  
4.110  
4.103  
2.474  
2.460  
2.455  
2.442  
2.437  
2.277  
2.266  
2.261  
2.249  
2.220  
2.105  
2.000  
1.984  
1.565  
1.547  
1.527  
1.510  
1.449  
1.430  
1.411  
1.393  
1.296  
1.278  
1.260  
0.927  
0.909  
0.891

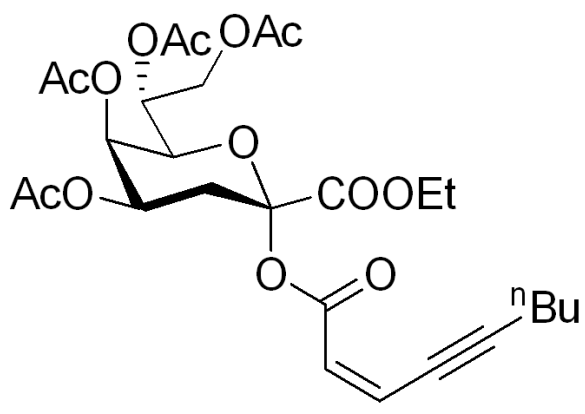

**1**  
(CDCl<sub>3</sub>, 400 MHz)

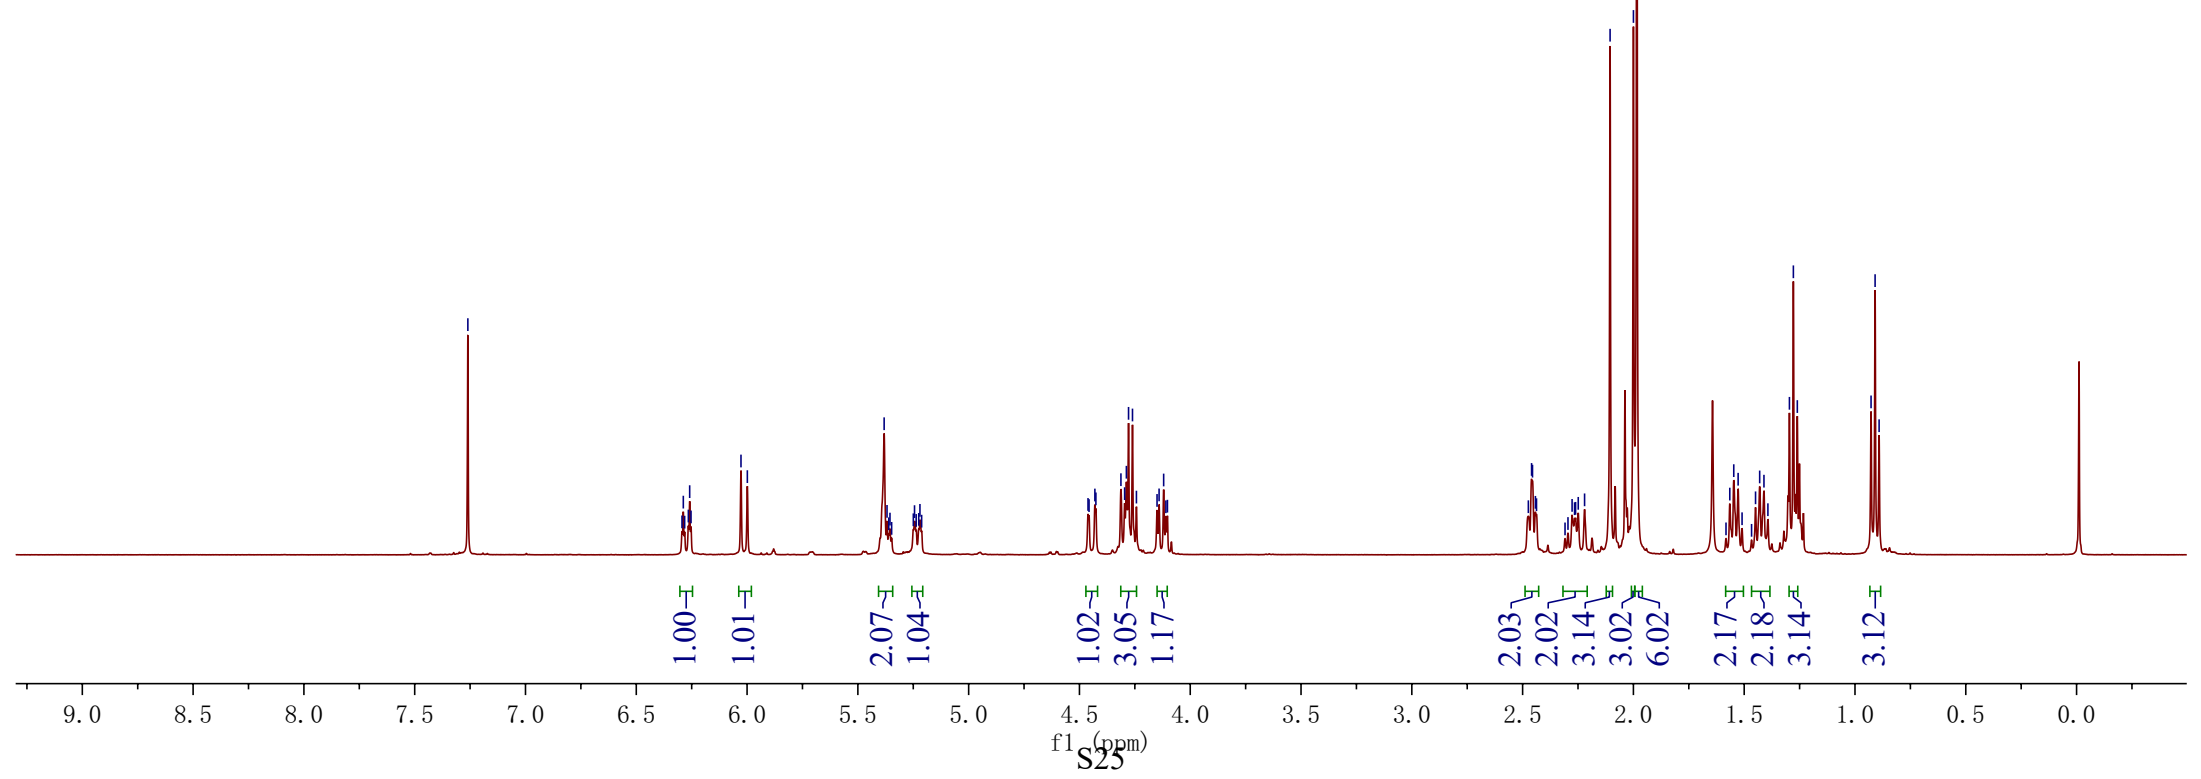

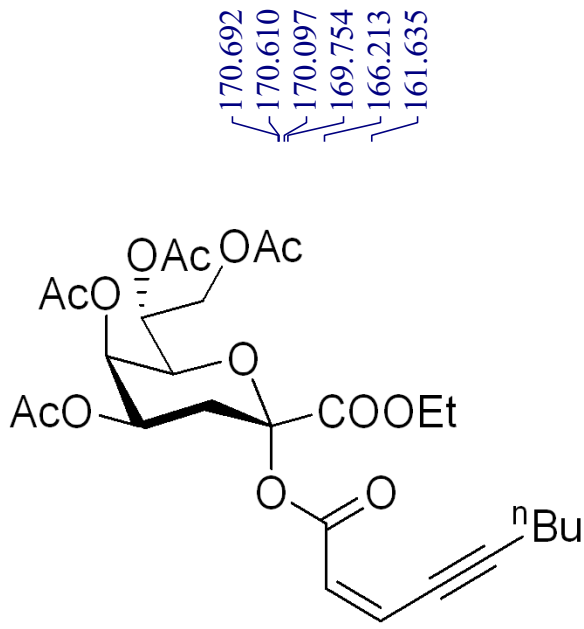

**1**  
(CDCl<sub>3</sub>, 100 MHz)

170.692  
170.610  
170.097  
169.754  
166.213  
161.635

126.355  
125.415

106.697

97.635

77.909  
77.518  
77.200  
76.882  
69.566  
67.477  
66.317  
64.128  
62.494  
62.257

31.150  
30.448  
22.166  
20.918  
20.860  
20.829  
20.727  
19.894  
14.072  
13.732

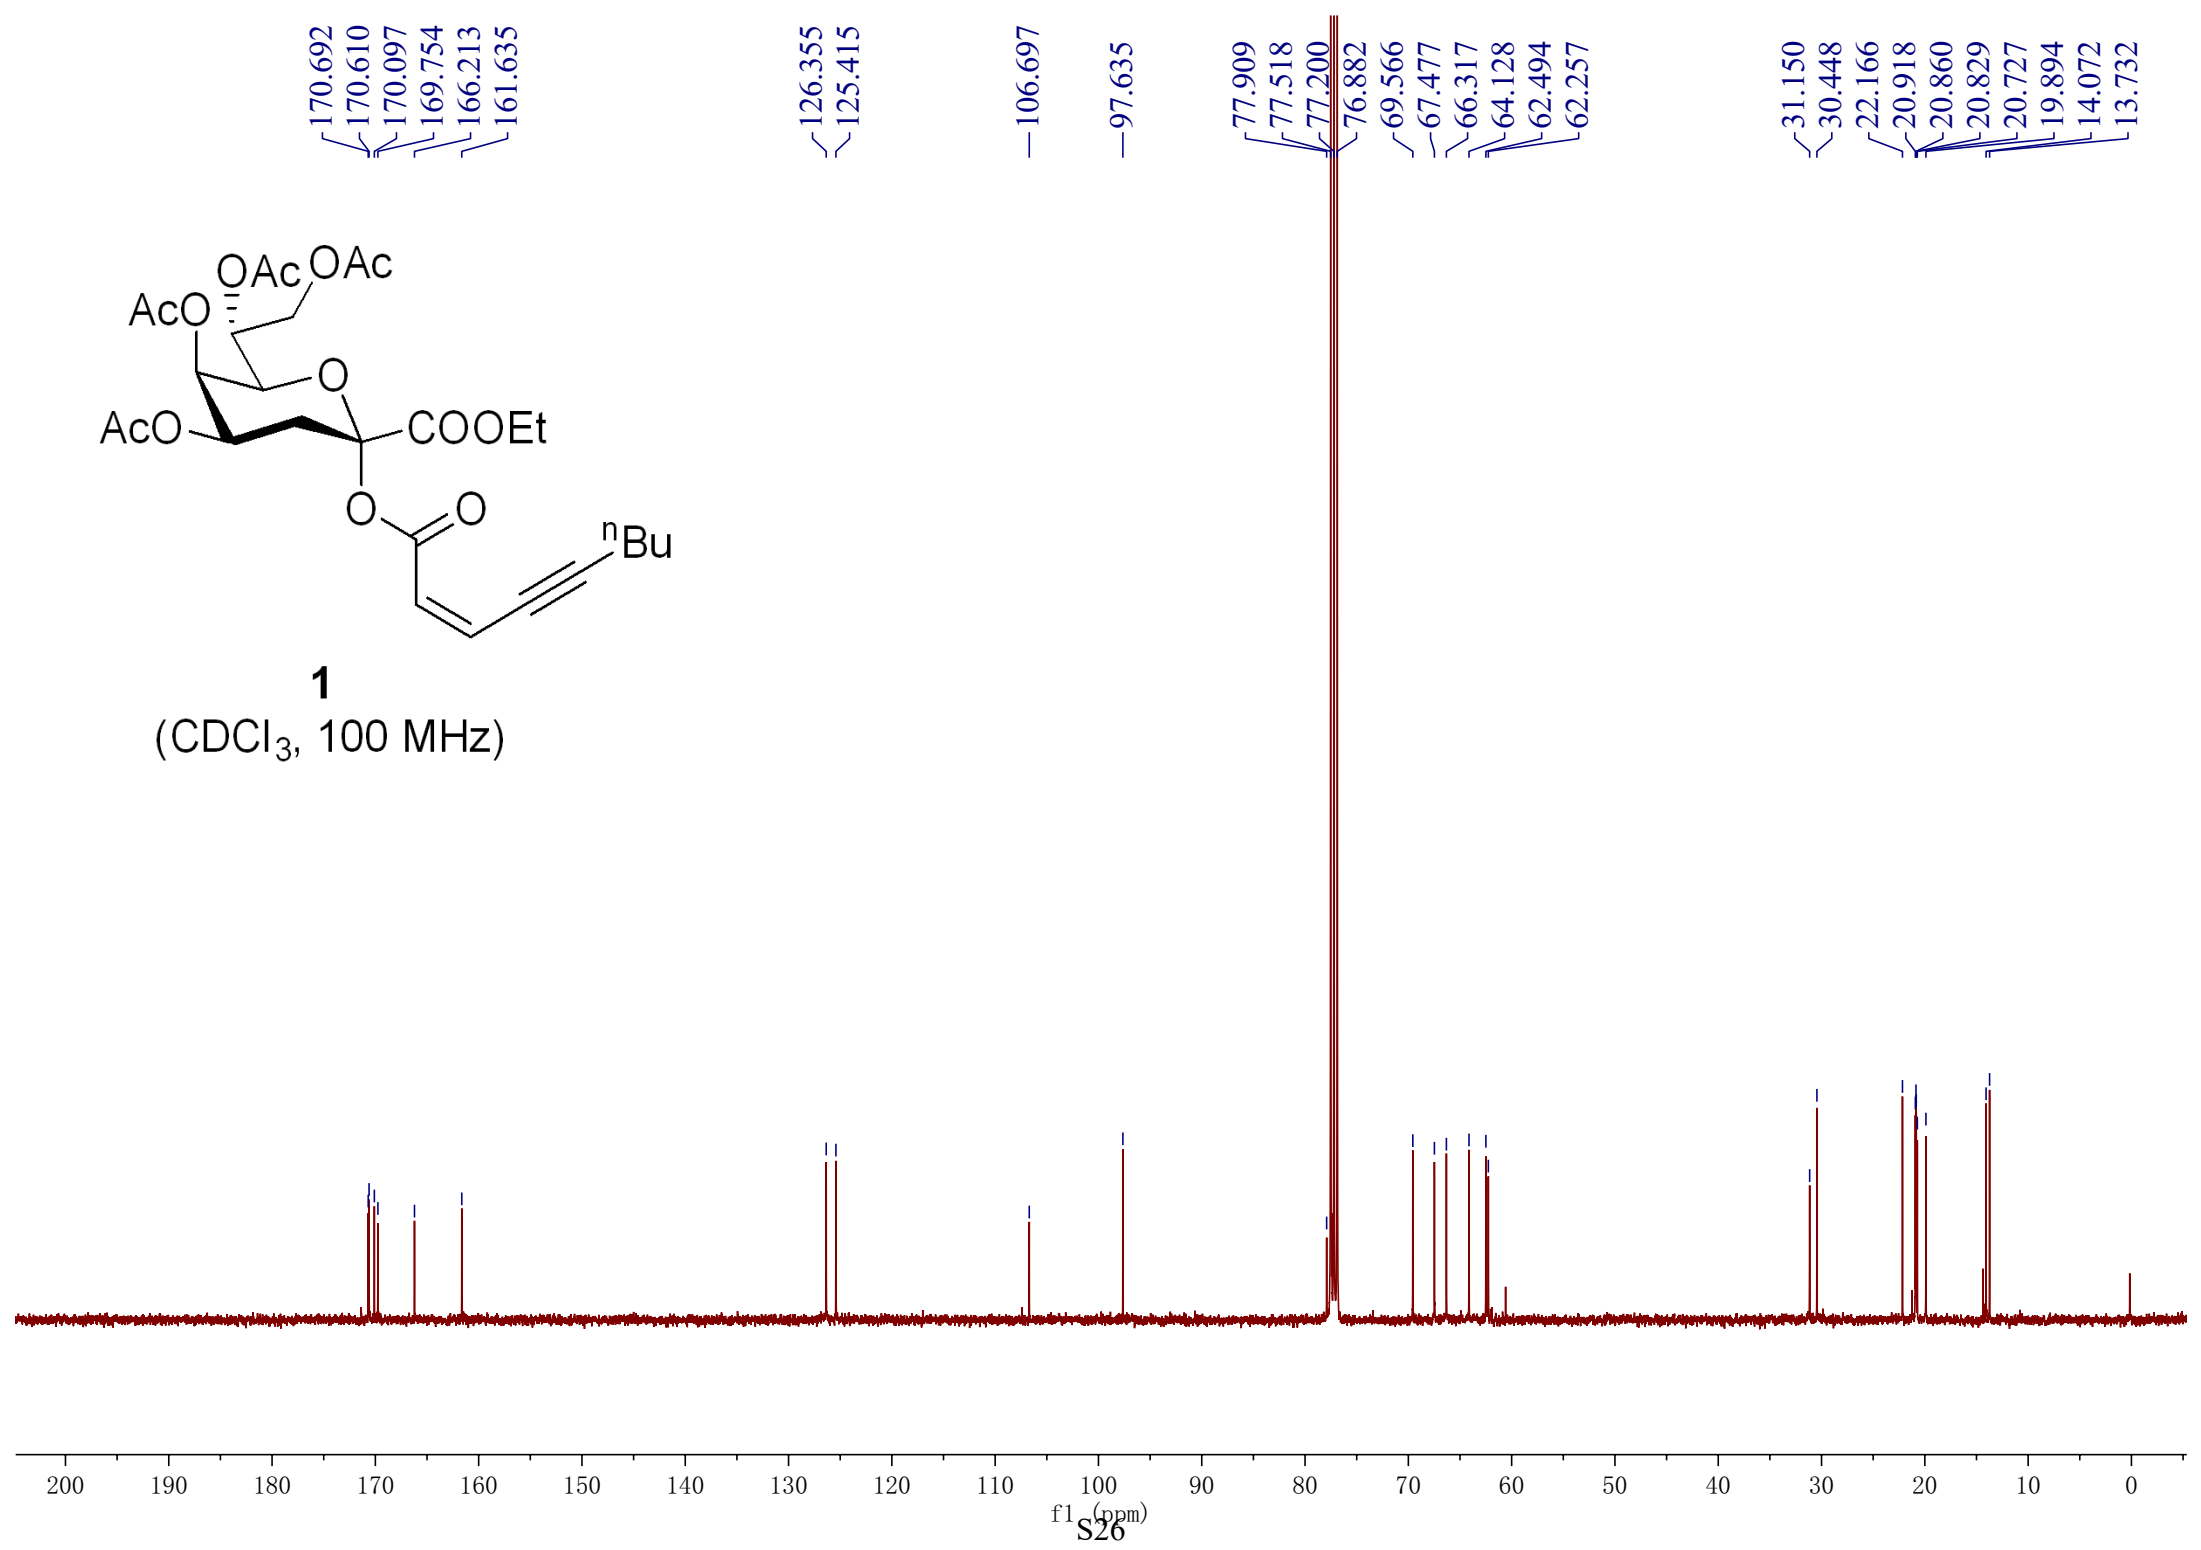

7.260  
5.376  
5.348  
5.341  
5.336  
5.199  
5.182  
5.175  
4.703  
4.696  
4.672  
4.666  
4.266  
4.248  
4.238  
4.221  
4.202  
4.199  
4.184  
4.174  
4.172  
4.167  
4.157  
4.140  
4.124  
4.116  
4.093  
4.085  
3.891  
2.351  
2.340  
2.321  
2.315  
2.306  
2.099  
2.058  
2.054  
2.040  
2.021  
1.996  
1.983  
1.968  
1.918  
1.826  
1.791  
1.767  
1.758  
1.751  
1.689  
1.610  
1.573  
1.533  
1.502  
1.471  
1.440  
1.314  
1.296  
1.278

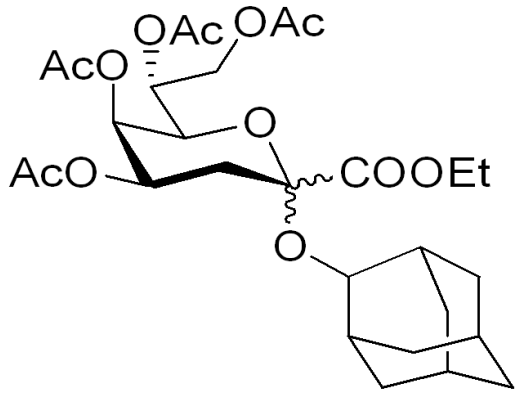

**3**

(CDCl<sub>3</sub>, 400 MHz)

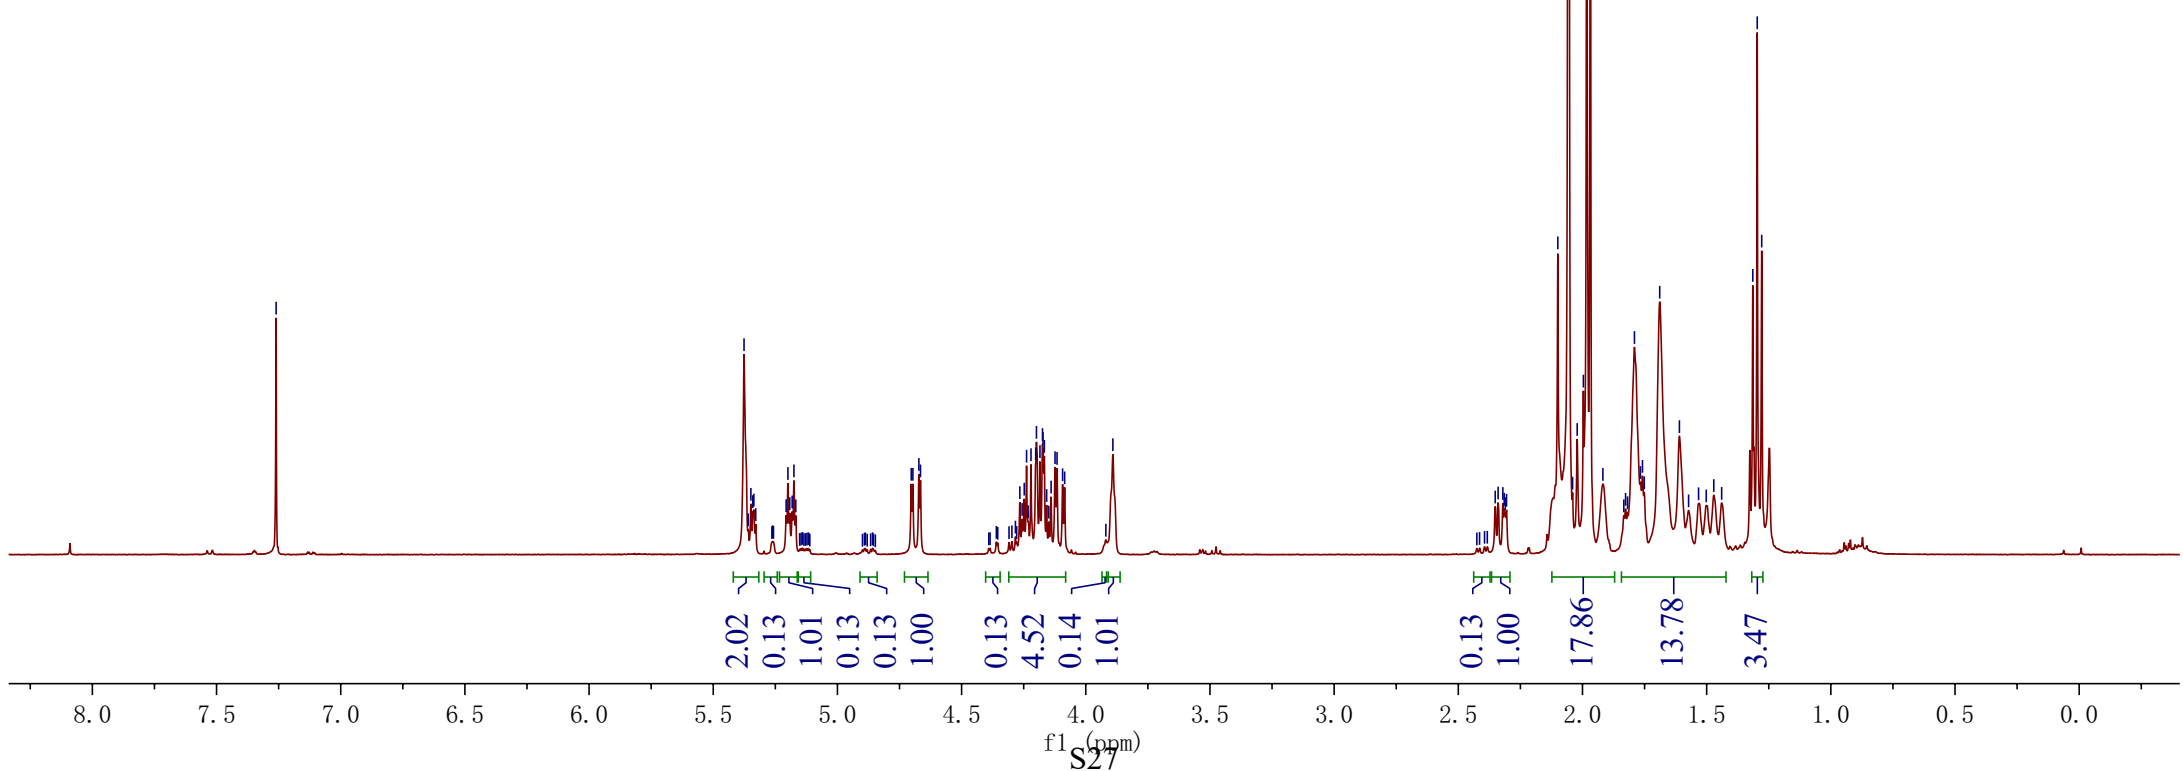

7.260  
5.355  
5.349  
5.333  
5.321  
5.232  
5.208  
4.618  
4.612  
4.587  
4.581  
4.361  
4.355  
4.278  
4.260  
4.242  
4.224  
4.160  
4.151  
4.129  
4.120  
4.095  
4.070  
3.467  
3.444  
3.292  
3.275  
3.270  
2.195  
2.183  
2.165  
2.159  
2.156  
2.149  
2.095  
2.086  
2.079  
2.066  
2.053  
2.022  
1.991  
1.981  
1.973  
1.965  
1.579  
1.559  
1.543  
1.337  
1.323  
1.319  
1.306  
1.288  
1.269  
1.240  
0.888  
0.884  
0.873  
0.855

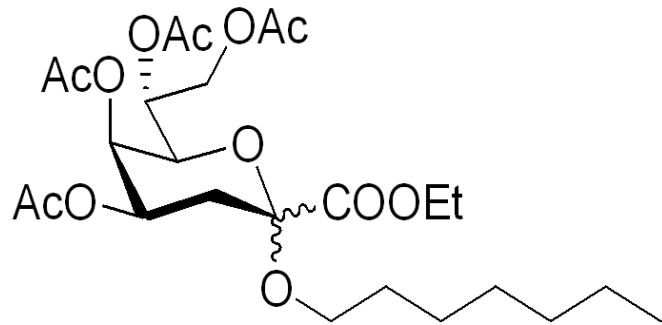

**5a**  
(CDCl<sub>3</sub>, 400 MHz)

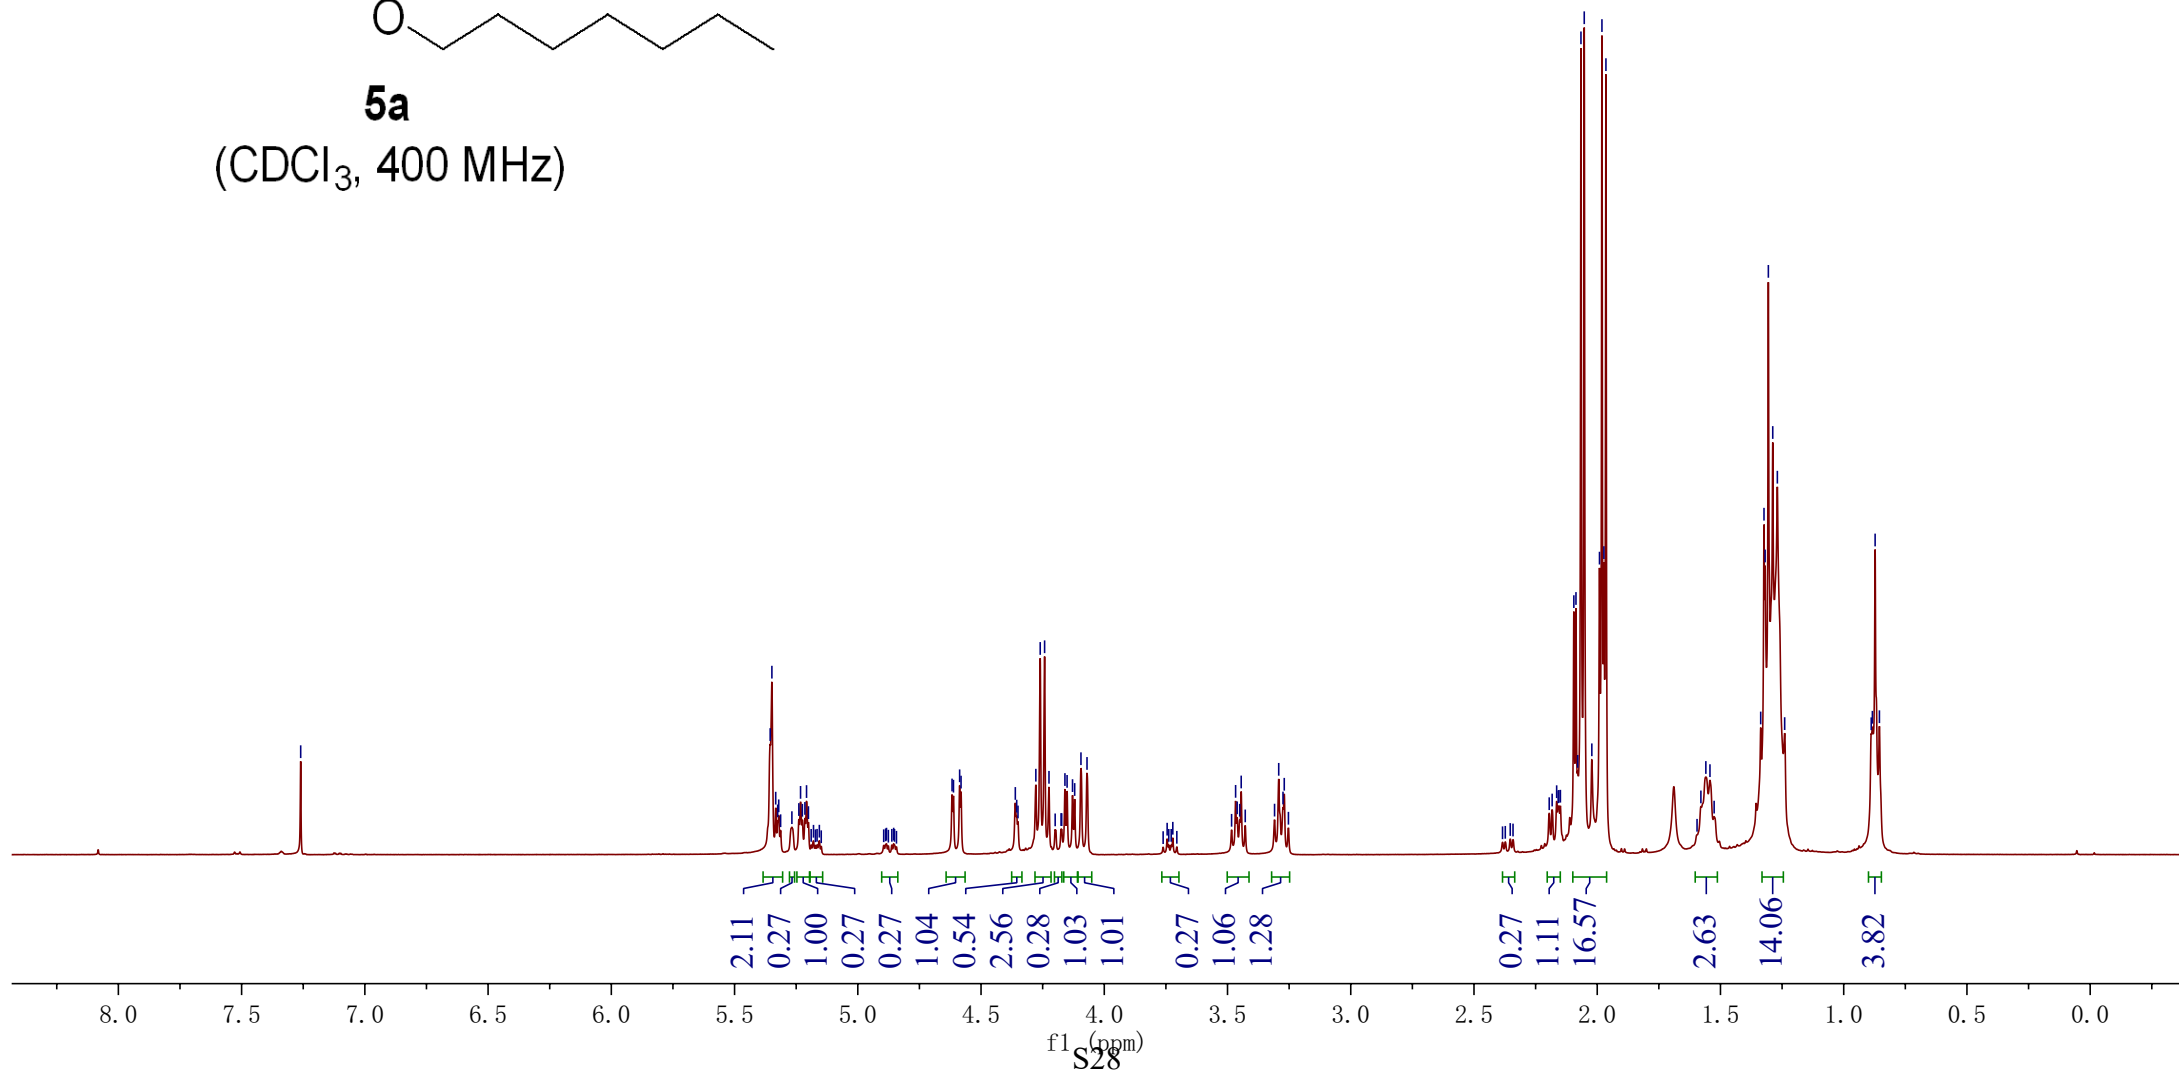

7.363 7.300 7.272 7.260 7.181 7.167  
 5.351 5.335 5.315 5.305 5.244 5.237 5.230 5.220 5.213 5.205 5.191 5.157  
 4.498 4.252 4.235 4.148 4.140 4.118 4.110 4.048 3.441 3.262 3.245 3.219 3.201  
 2.172 2.151 2.141 2.077 2.057 2.026 1.987 1.974 1.842 1.330 1.313 1.296 1.281 1.252

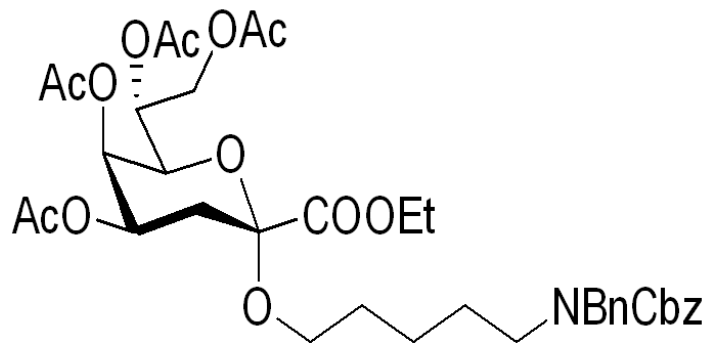

**5b**

(CDCl<sub>3</sub>, 400 MHz)

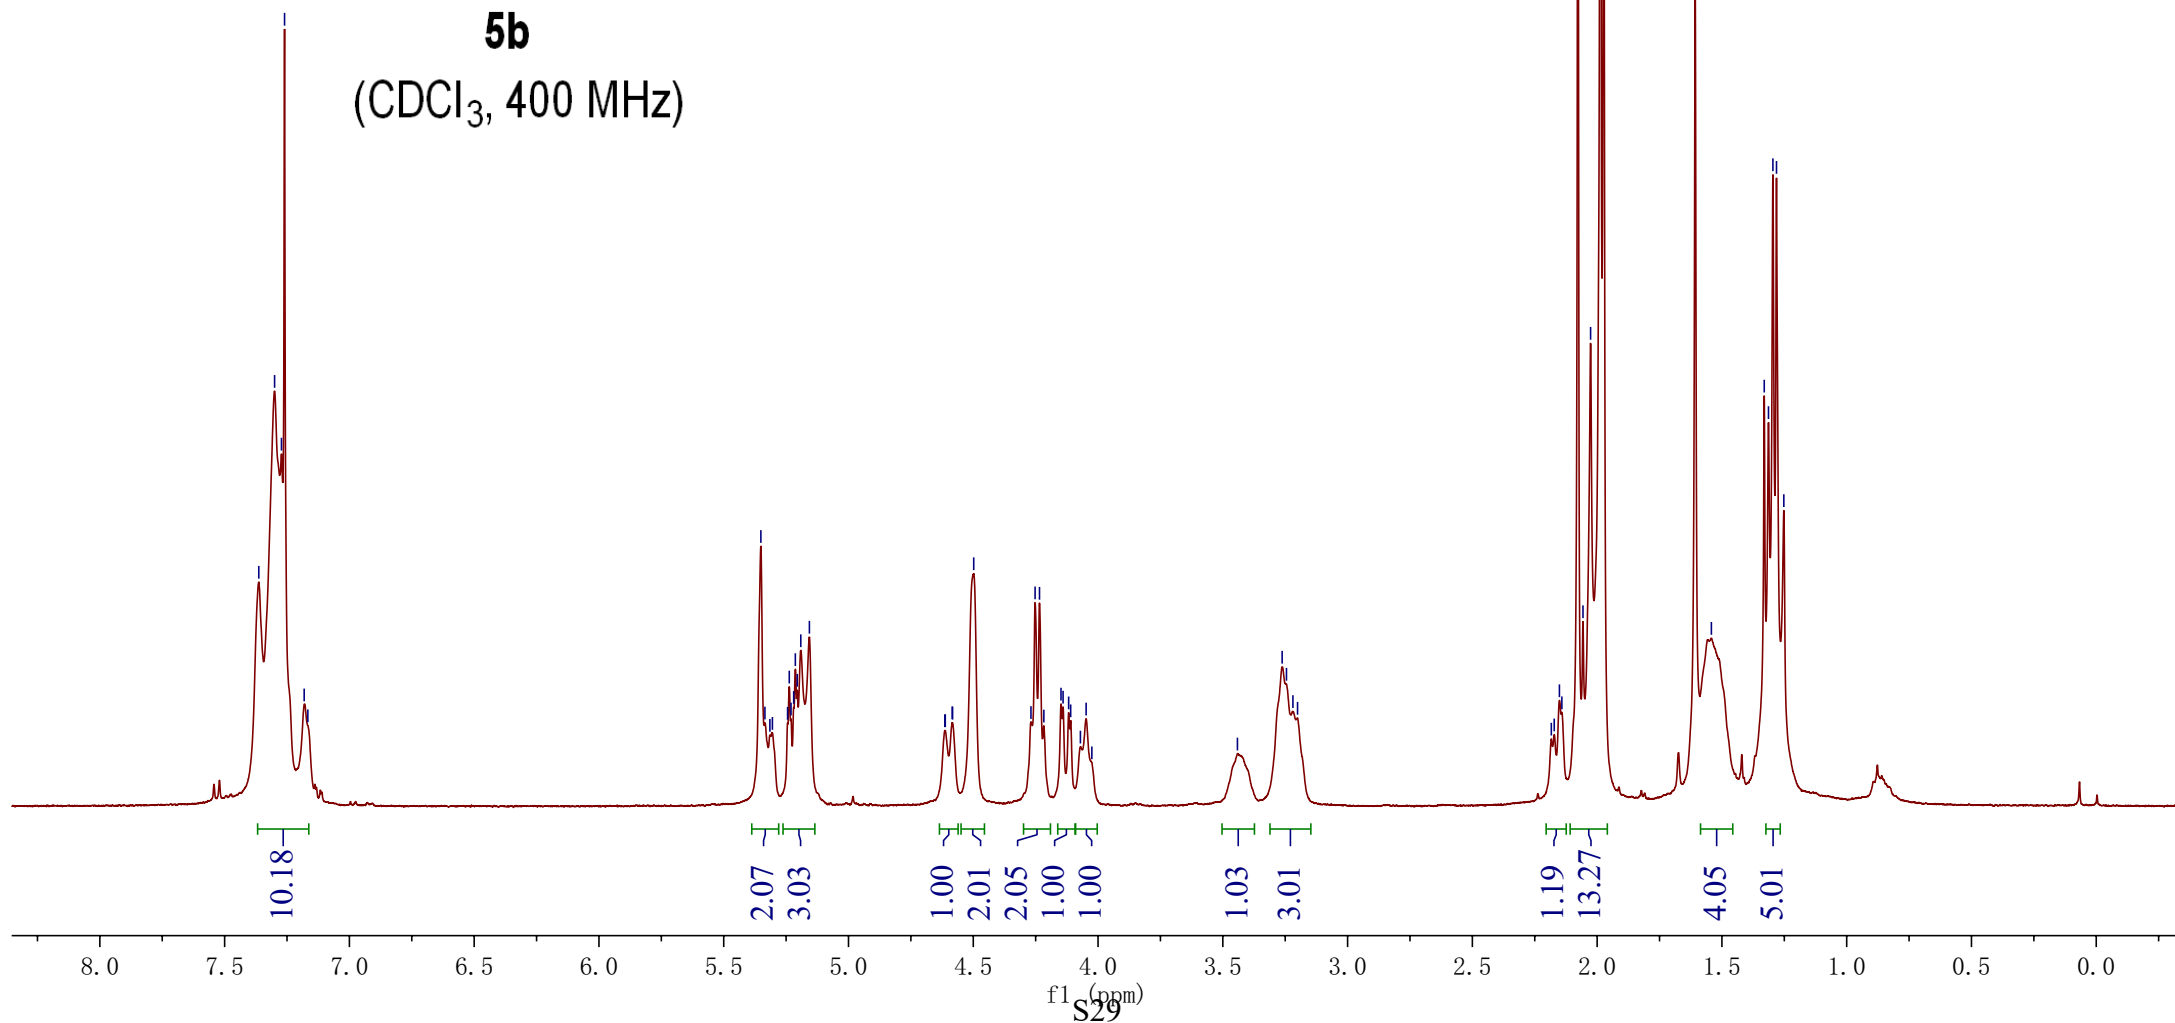

7.260  
5.367  
5.354  
5.347  
5.335  
5.327  
5.324  
5.316  
5.243  
5.234  
5.227  
5.219  
5.211  
5.203  
4.679  
4.672  
4.648  
4.642  
4.351  
4.348  
4.339  
4.327  
4.324  
4.312  
4.303  
4.294  
4.285  
4.276  
4.258  
4.232  
4.214  
4.196  
4.187  
4.178  
4.169  
4.160  
4.151  
4.129  
4.120  
2.201  
2.190  
2.171  
2.160  
2.096  
2.062  
2.050  
1.976  
1.958  
1.925  
1.894  
1.860  
1.625  
1.589  
1.561  
1.530  
1.356  
1.338  
1.321

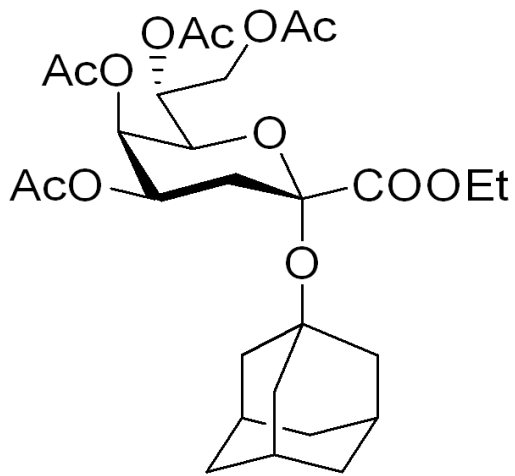

**5c**

(CDCl<sub>3</sub>, 400 MHz)

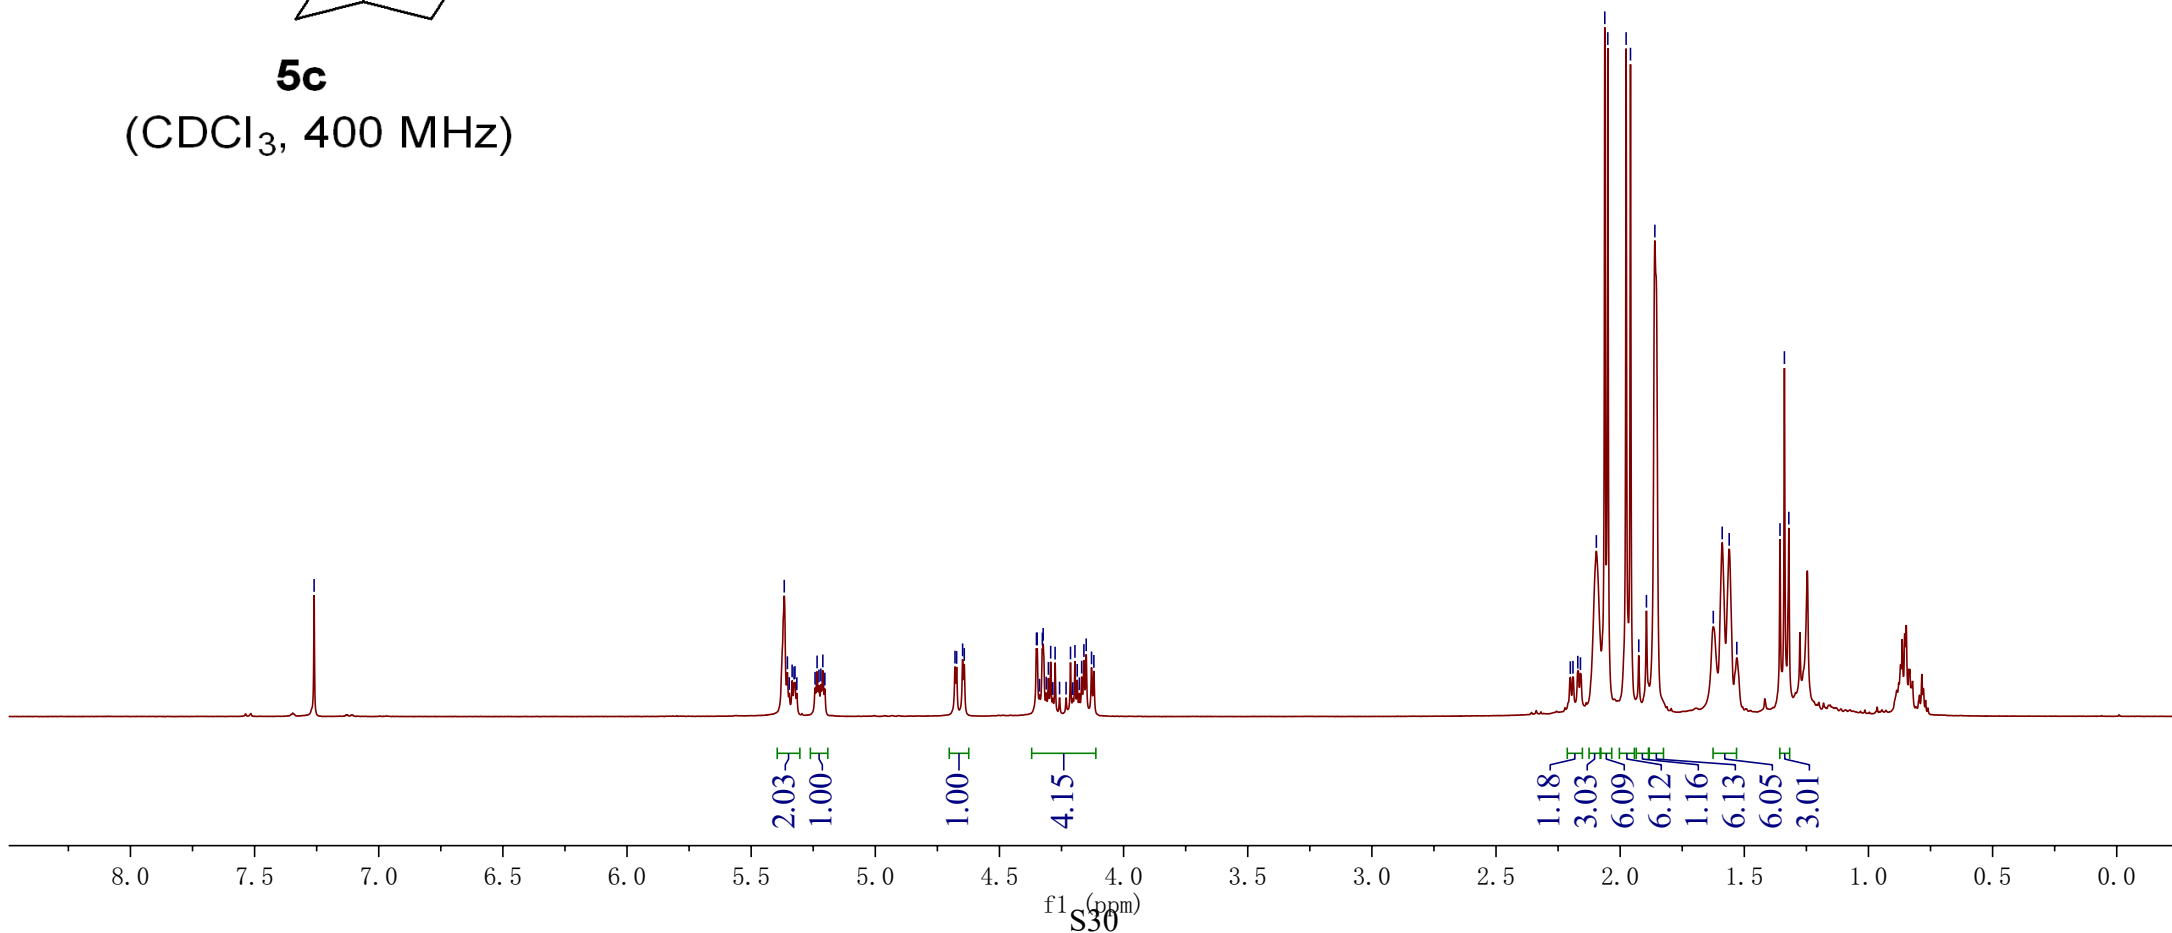

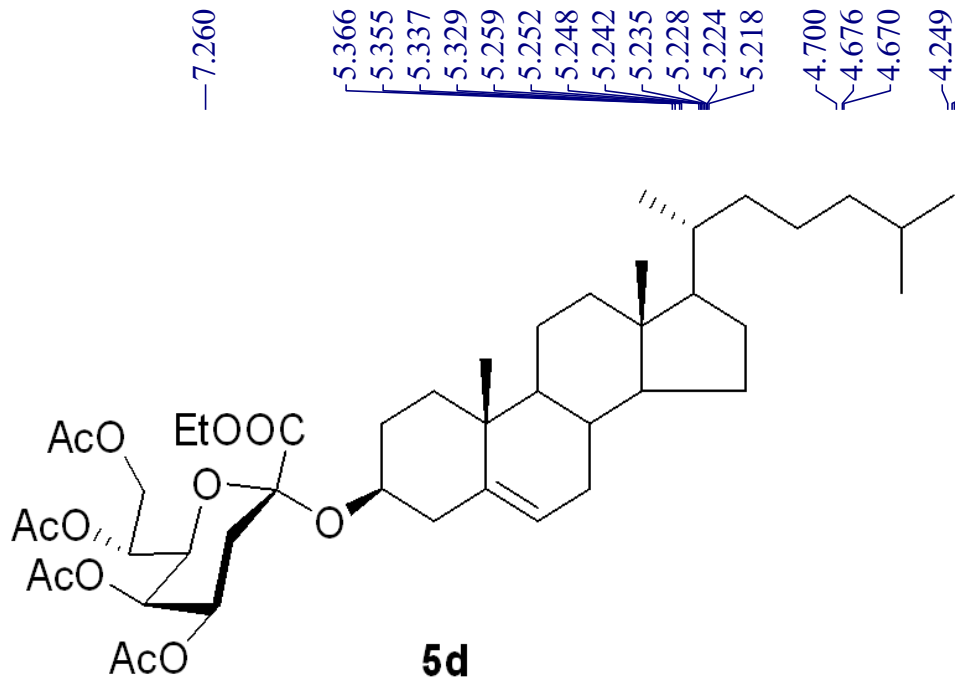

**5d**  
(CDCl<sub>3</sub>, 400 MHz)

7.260  
5.366  
5.355  
5.337  
5.329  
5.259  
5.252  
5.248  
5.242  
5.235  
5.228  
5.224  
5.218  
4.700  
4.676  
4.670  
4.249  
4.231  
4.222  
4.196  
3.539  
3.524  
3.511  
3.499  
3.484  
3.469  
2.359  
2.332  
2.312  
2.299  
2.279  
2.275  
2.266  
2.262  
2.238  
2.228  
2.208  
2.195  
2.063  
2.054  
1.978  
1.972

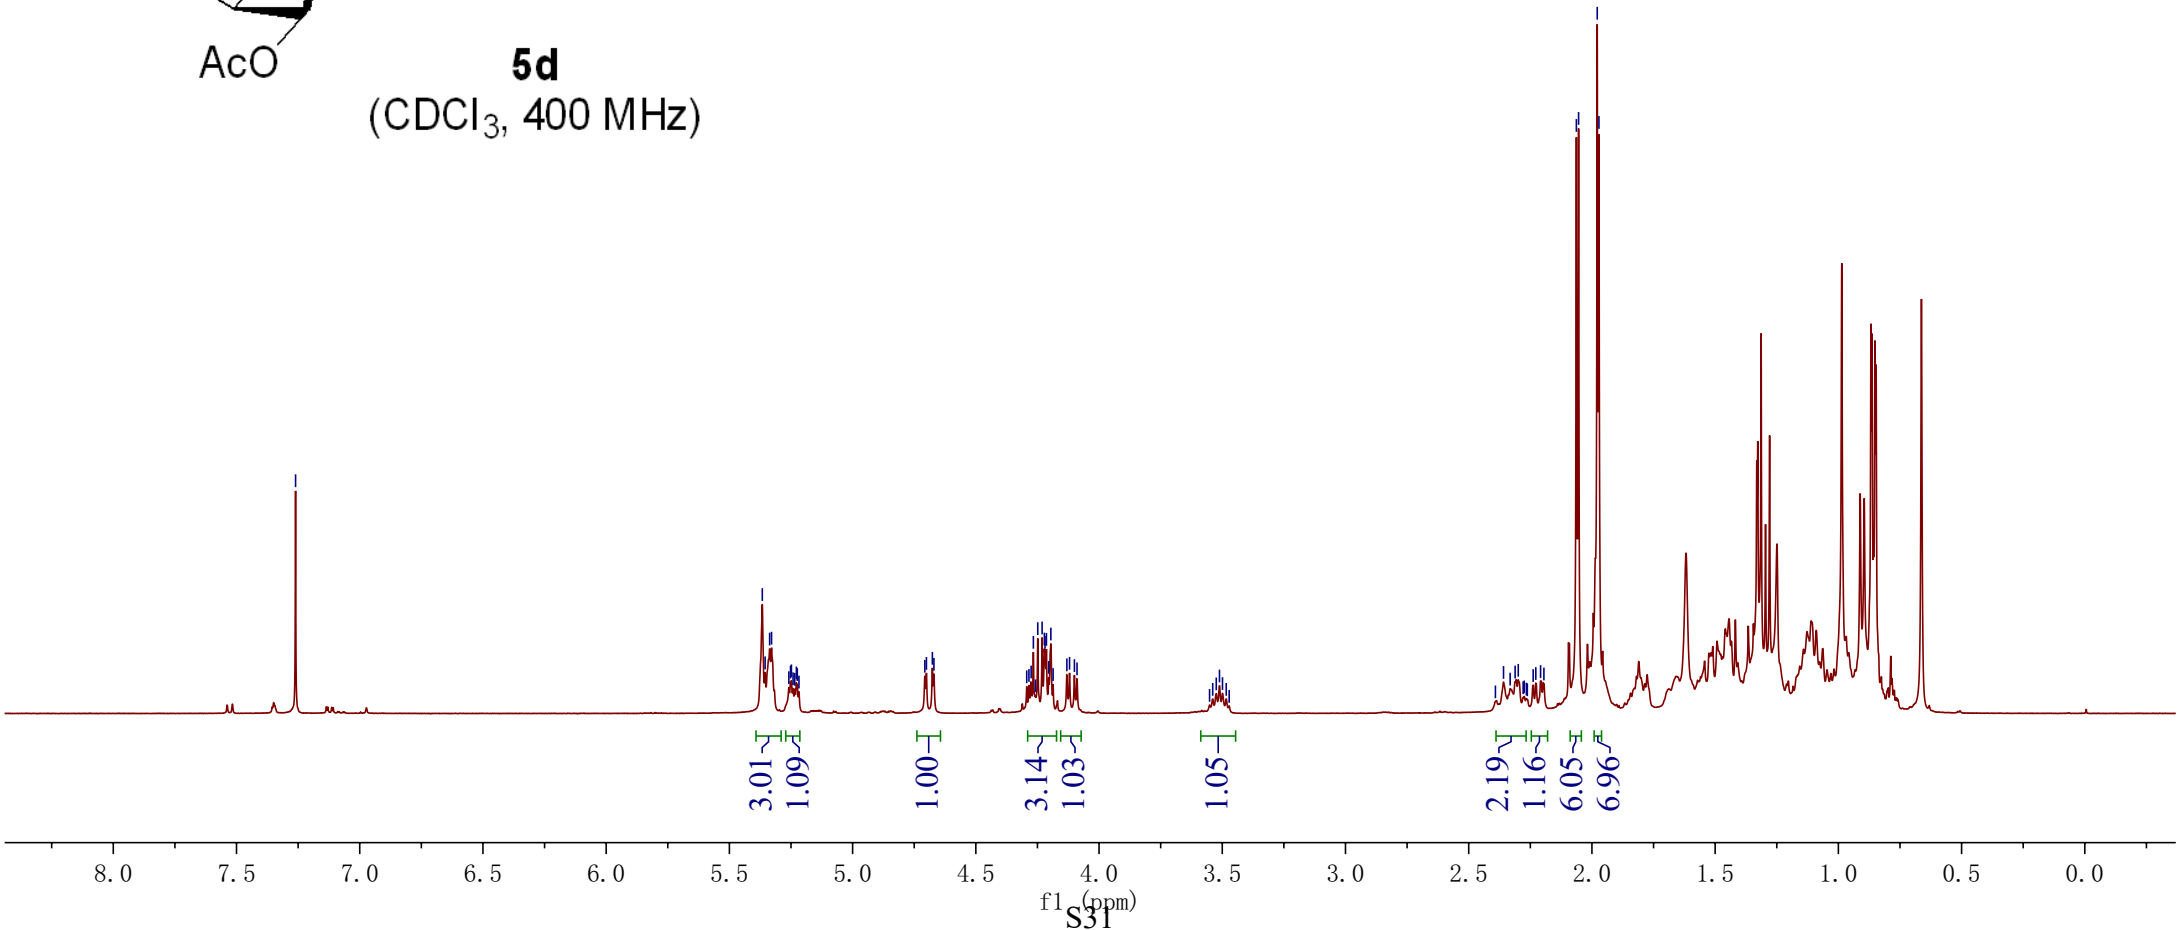

7.260  
5.514  
5.502  
5.356  
5.341  
5.329  
5.276  
5.270  
5.265  
5.259  
4.598  
4.592  
4.585  
4.579  
4.572  
4.554  
4.549  
4.353  
4.329  
4.298  
4.292  
4.286  
4.280  
4.269  
4.263  
4.251  
4.245  
4.233  
4.227  
4.206  
4.202  
4.186  
4.182  
4.158  
4.145  
4.128  
4.114  
3.970  
3.957  
3.645  
3.642  
3.634  
3.626  
2.174  
2.170  
2.164  
2.160  
2.092  
2.078  
2.059  
2.048  
2.002  
1.962  
1.557  
1.405  
1.329  
1.316  
1.303

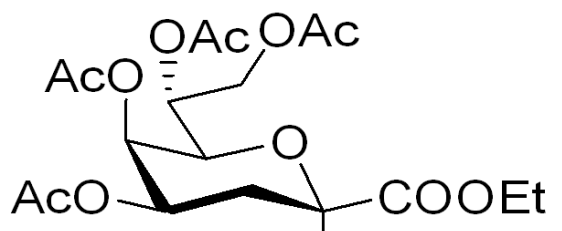

**5e**

(CDCl<sub>3</sub>, 400 MHz)

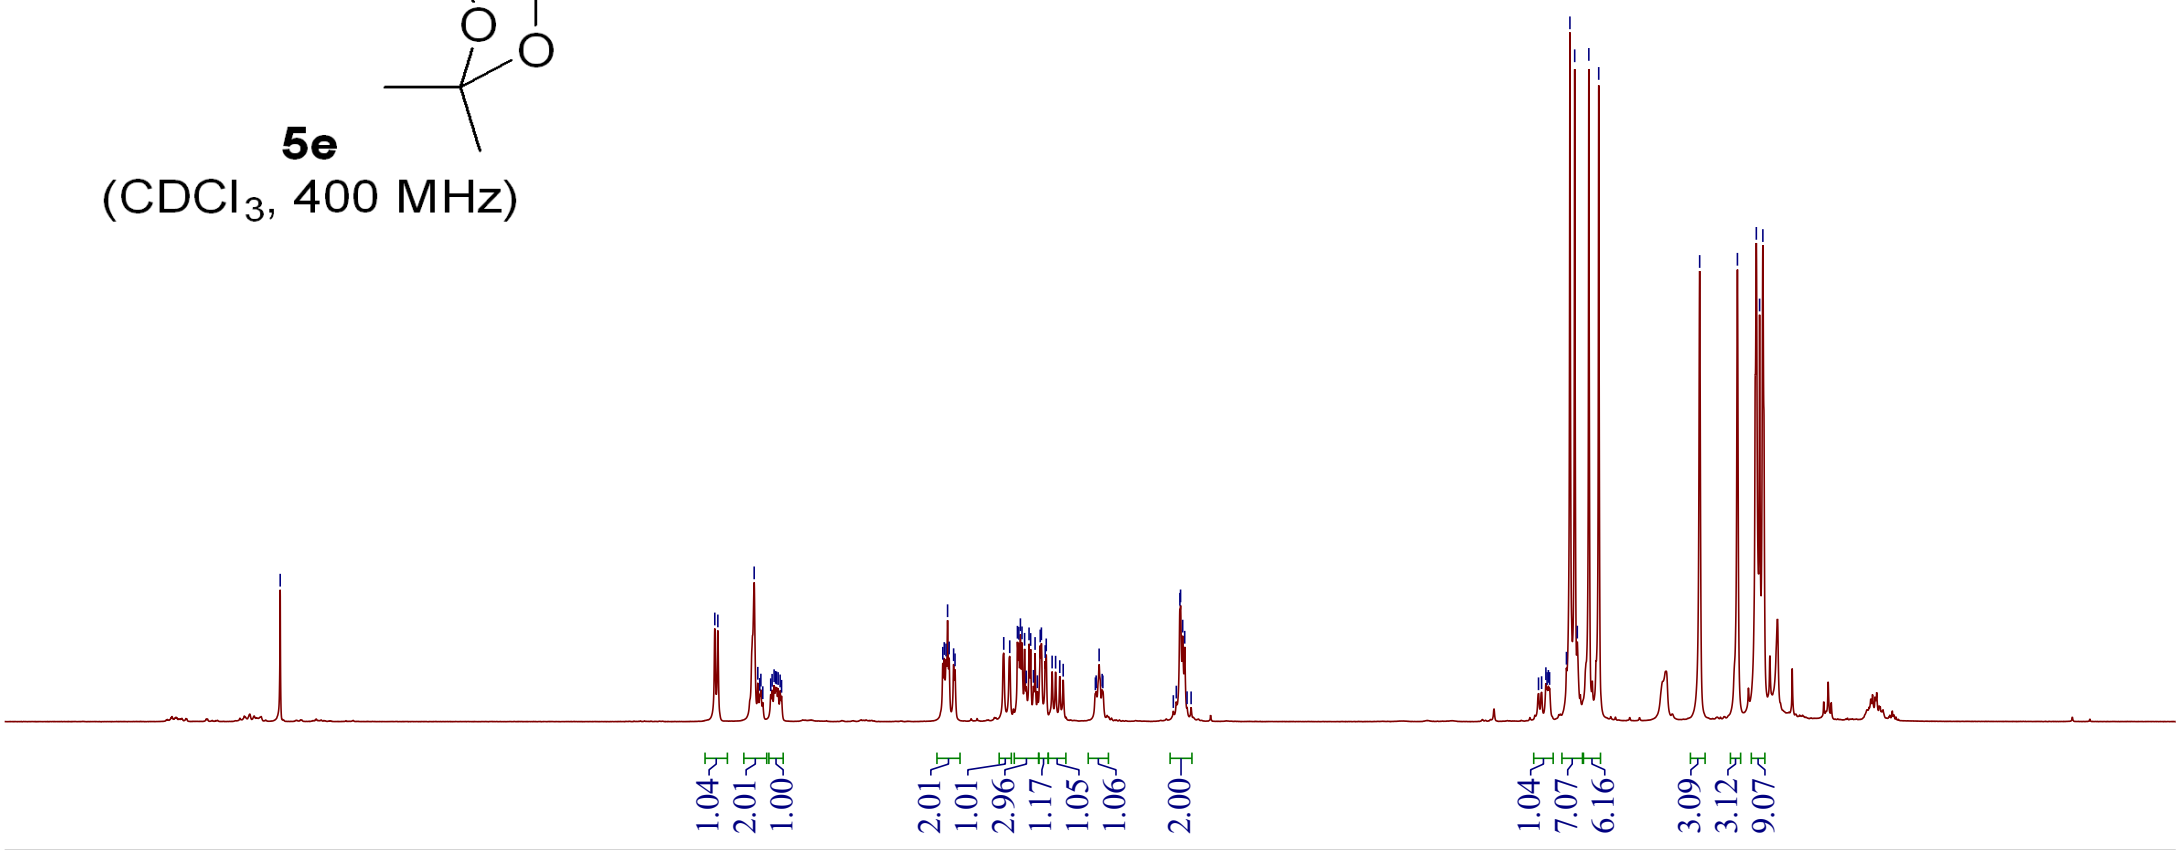

1.04  
2.01  
1.00

2.01  
1.01  
2.96  
1.17  
1.05  
1.06

2.00

1.04  
7.07  
6.16

3.09  
3.12  
9.07

8.0 7.5 7.0 6.5 6.0 5.5 5.0 4.5 4.0 3.5 3.0 2.5 2.0 1.5 1.0 0.5 0.0



7.369  
7.351  
7.333  
7.324  
7.319  
7.314  
7.295  
7.282  
7.279  
7.266  
7.260  
7.241  
5.308  
5.002  
4.975  
4.933  
4.906  
4.818  
4.805  
4.791  
4.775  
4.685  
4.655  
4.576  
4.567  
4.549  
4.544  
4.529  
4.519  
4.513  
4.501  
4.176  
4.158  
4.140  
4.136  
4.133  
4.097  
4.086  
3.991  
3.968  
3.671  
3.649  
3.480  
3.470  
3.456  
3.447  
3.443  
3.419  
3.247  
3.245  
2.070  
2.047  
1.983  
1.962  
1.881  
1.227  
1.209  
1.191

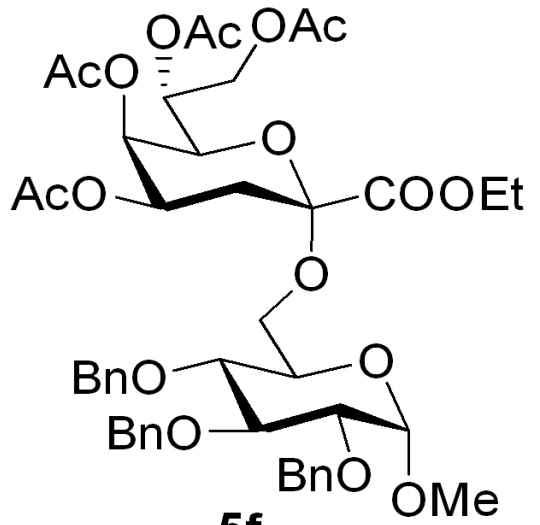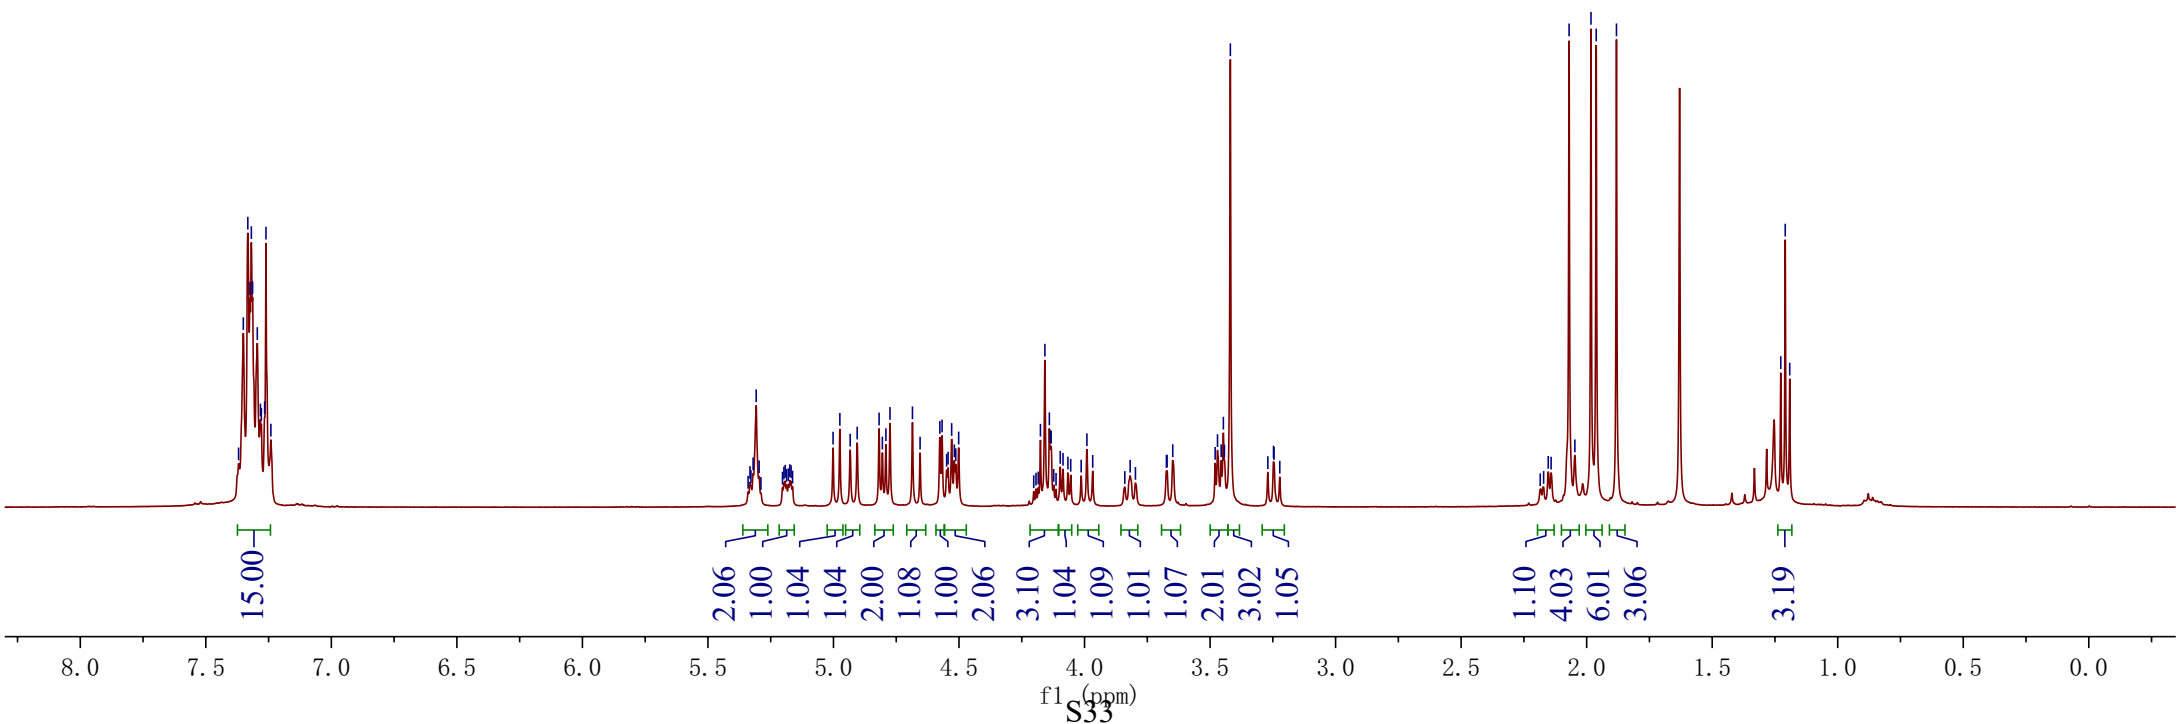

8.057  
8.039  
8.036  
7.586  
7.466  
7.447  
7.435  
7.429  
7.334  
7.318  
7.298  
7.289  
7.282  
7.271  
7.260  
7.202  
7.182  
7.177  
7.146  
7.138  
7.135  
7.127  
7.121  
7.106  
5.335  
5.310  
5.288  
4.952  
4.924  
4.711  
4.686  
4.679  
4.660  
4.652  
4.626  
4.598  
4.200  
4.190  
4.182  
4.173  
4.098  
4.095  
4.073  
3.771  
3.591  
3.579  
3.573  
2.299  
2.083  
2.062  
2.052  
2.012  
2.008  
1.980  
1.285  
1.271  
1.255  
1.219

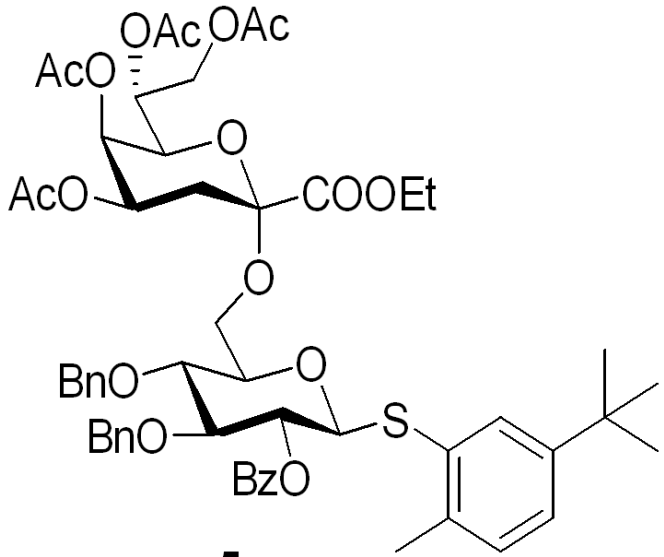

**5g**

(CDCl<sub>3</sub>, 400 MHz)

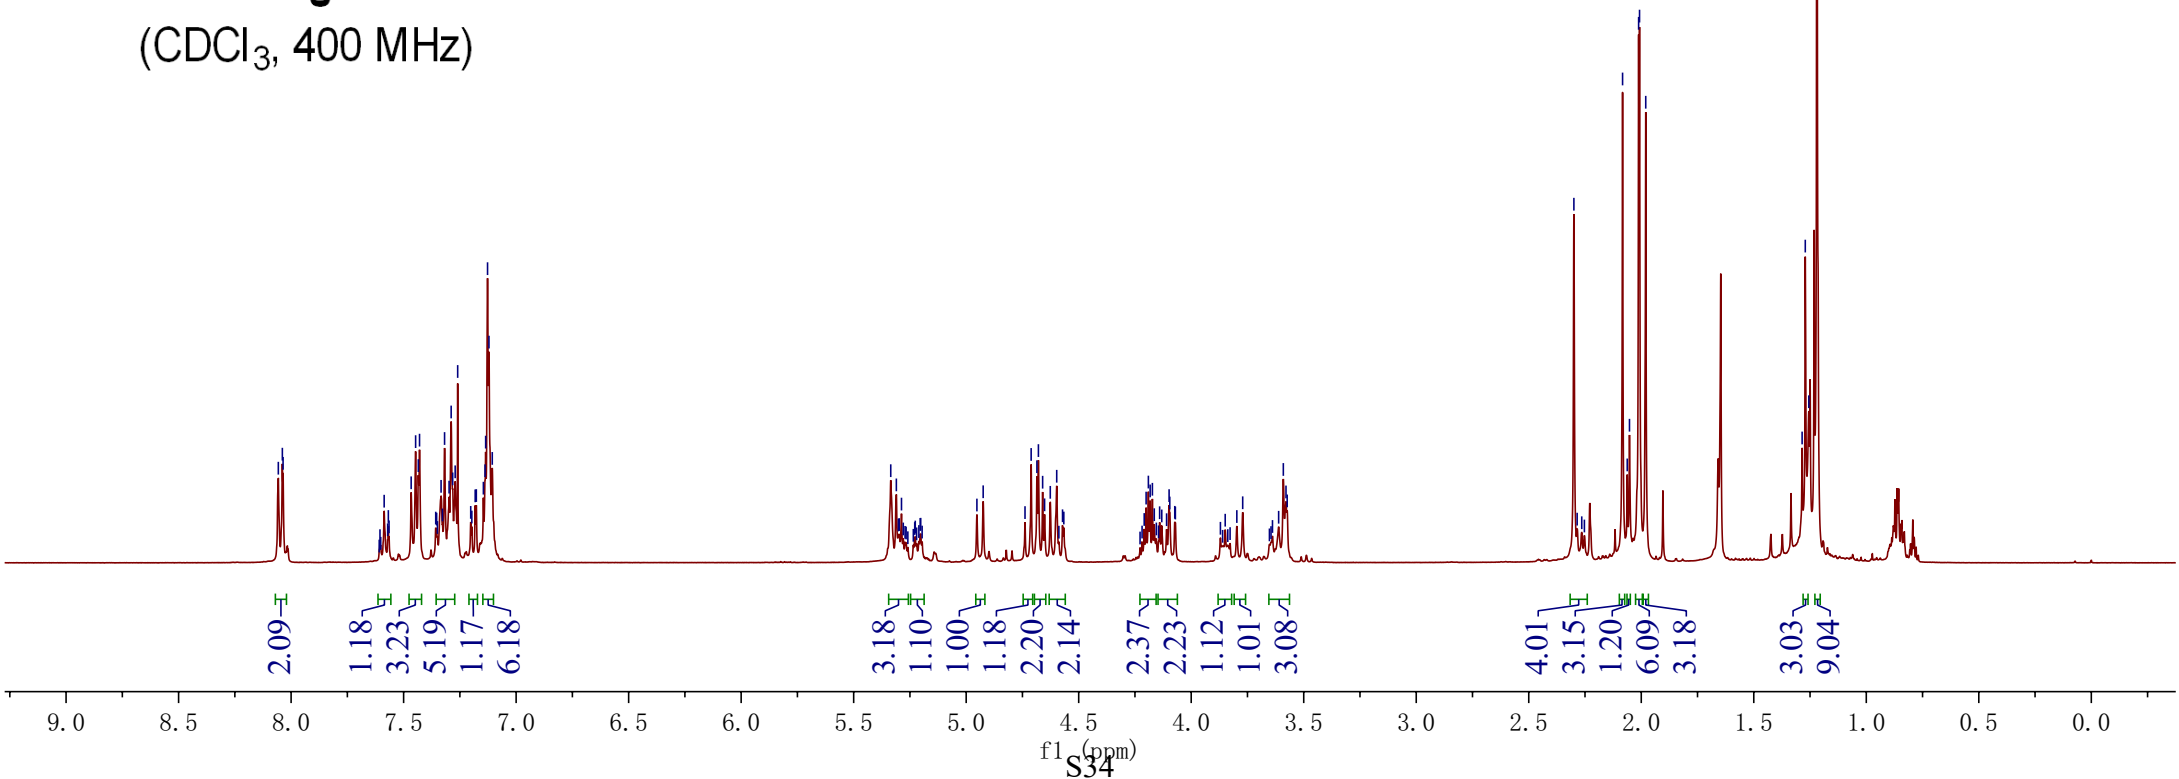

170.722  
170.611  
169.939  
169.785  
166.888  
165.456

149.781  
137.978  
137.674  
133.425  
130.292  
130.128  
130.000  
128.653  
128.481  
128.222  
128.067  
127.939  
127.903  
125.478  
99.067

88.605  
84.494  
78.649  
78.051  
77.412  
77.200  
76.989  
75.489  
75.331  
68.511  
67.803  
66.578  
64.448  
64.006  
62.242  
54.988  
54.508  
31.860  
31.355  
21.065  
20.905  
20.885  
20.839  
20.637  
14.209

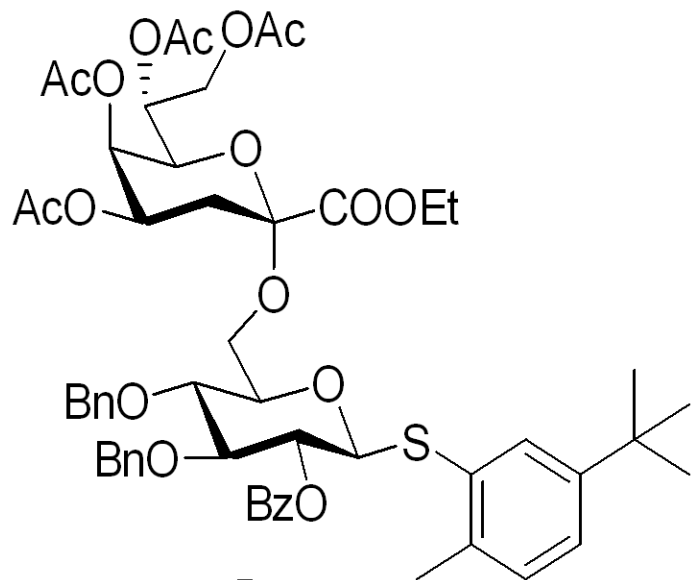

**5g**

(CDCl<sub>3</sub>, 100 MHz)

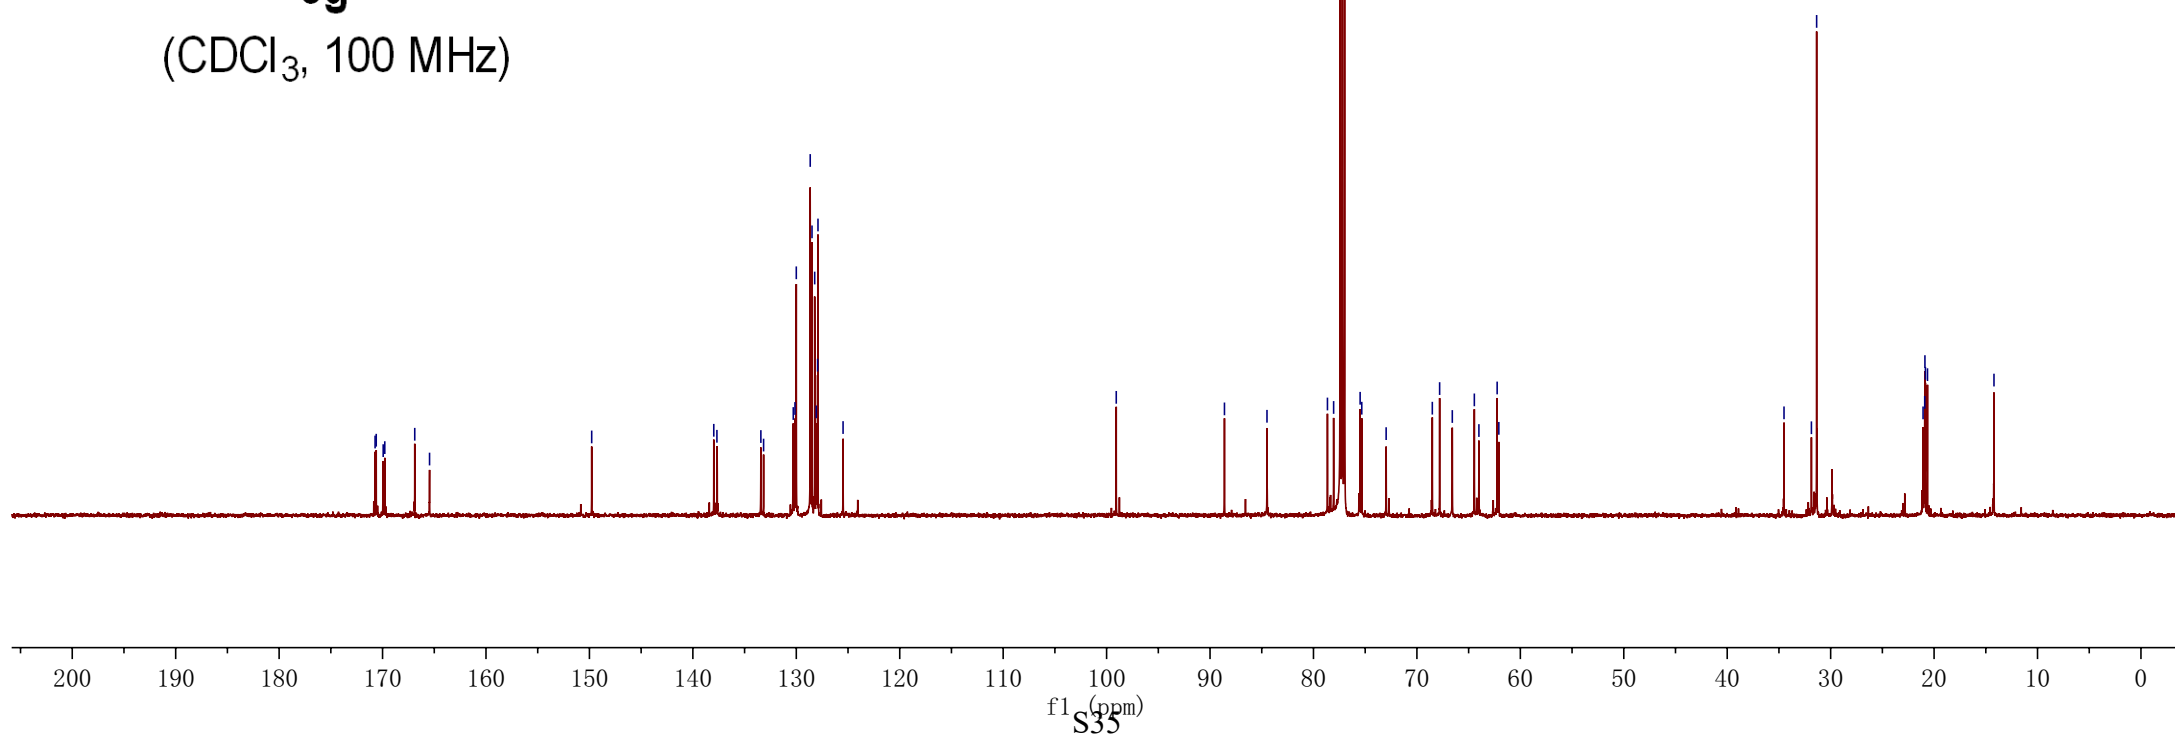

7.260  
6.992  
6.986  
6.974  
6.969  
6.839  
6.833  
6.822  
6.816  
5.562  
5.375  
5.370  
5.360  
5.352  
5.346  
5.335  
5.329  
5.317  
5.309  
4.670  
4.664  
4.639  
4.633  
4.307  
4.304  
4.300  
4.284  
4.281  
4.271  
4.260  
4.254  
4.244  
4.241  
4.236  
4.230  
4.223  
3.812  
3.796  
3.788  
3.769  
3.651  
3.636  
3.627  
3.613  
2.186  
2.174  
2.105  
2.083  
2.075  
1.991  
1.973  
1.530  
1.377  
1.344  
1.326  
1.309  
1.168  
1.152

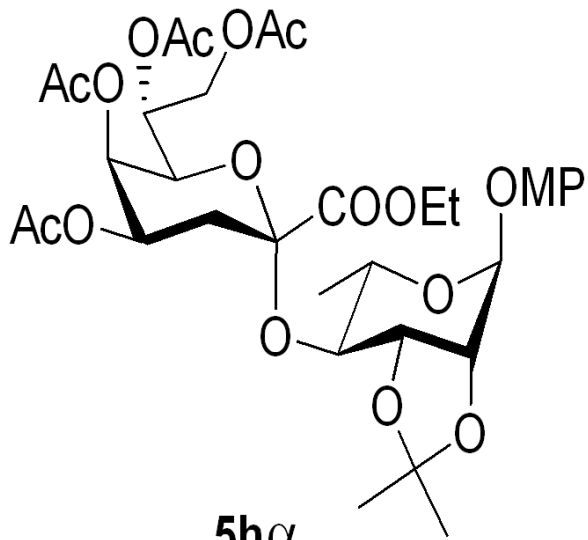

**5h $\alpha$**   
(CDCl<sub>3</sub>, 400 MHz)

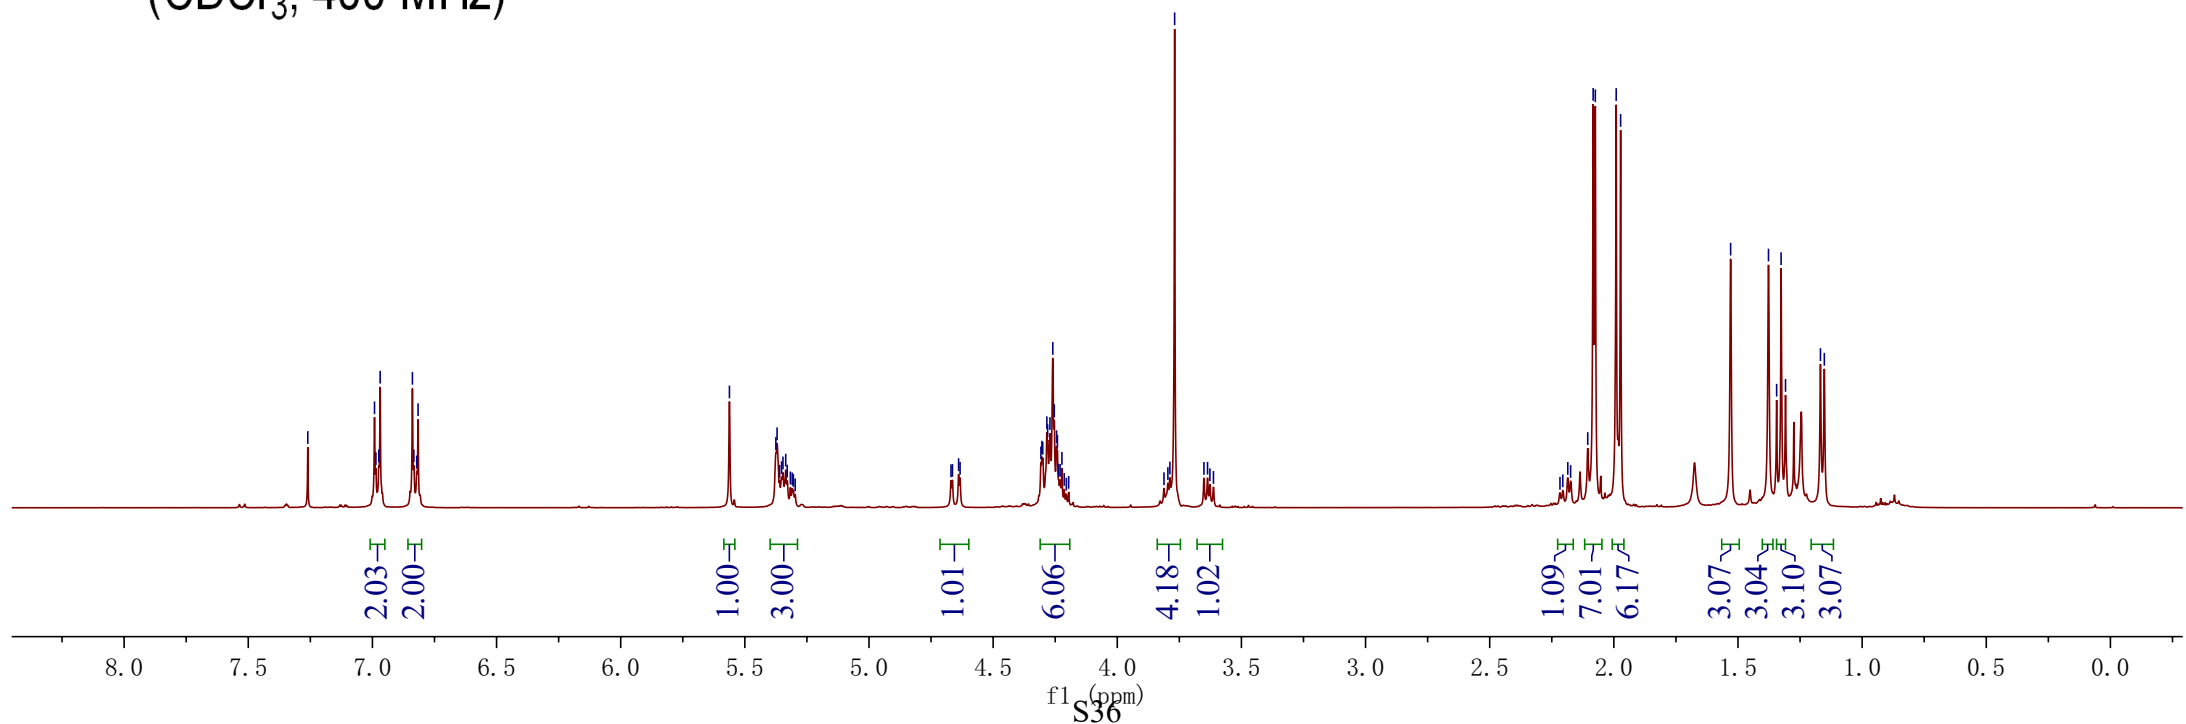

7.449  
7.444  
7.429  
7.426  
7.412  
7.392  
7.387  
7.375  
7.365  
7.360  
7.355  
7.349  
7.346  
7.336  
7.333  
7.315  
7.260  
5.349  
5.133  
4.808  
4.779  
4.649  
4.626  
4.620  
4.597  
4.579  
4.570  
4.309  
4.286  
4.264  
4.186  
4.172  
4.163  
4.149  
4.133  
4.118  
3.681  
3.656  
3.601  
3.588  
3.578  
3.564  
3.555  
3.393  
3.384  
3.366  
3.344  
3.144  
3.126  
2.195  
2.088  
2.042  
2.033  
1.948  
1.946  
0.904  
0.886  
0.868

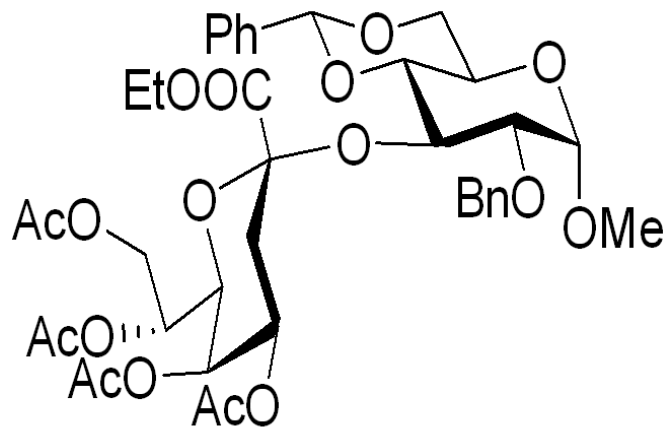

**5i**

(CDCl<sub>3</sub>, 400 MHz)

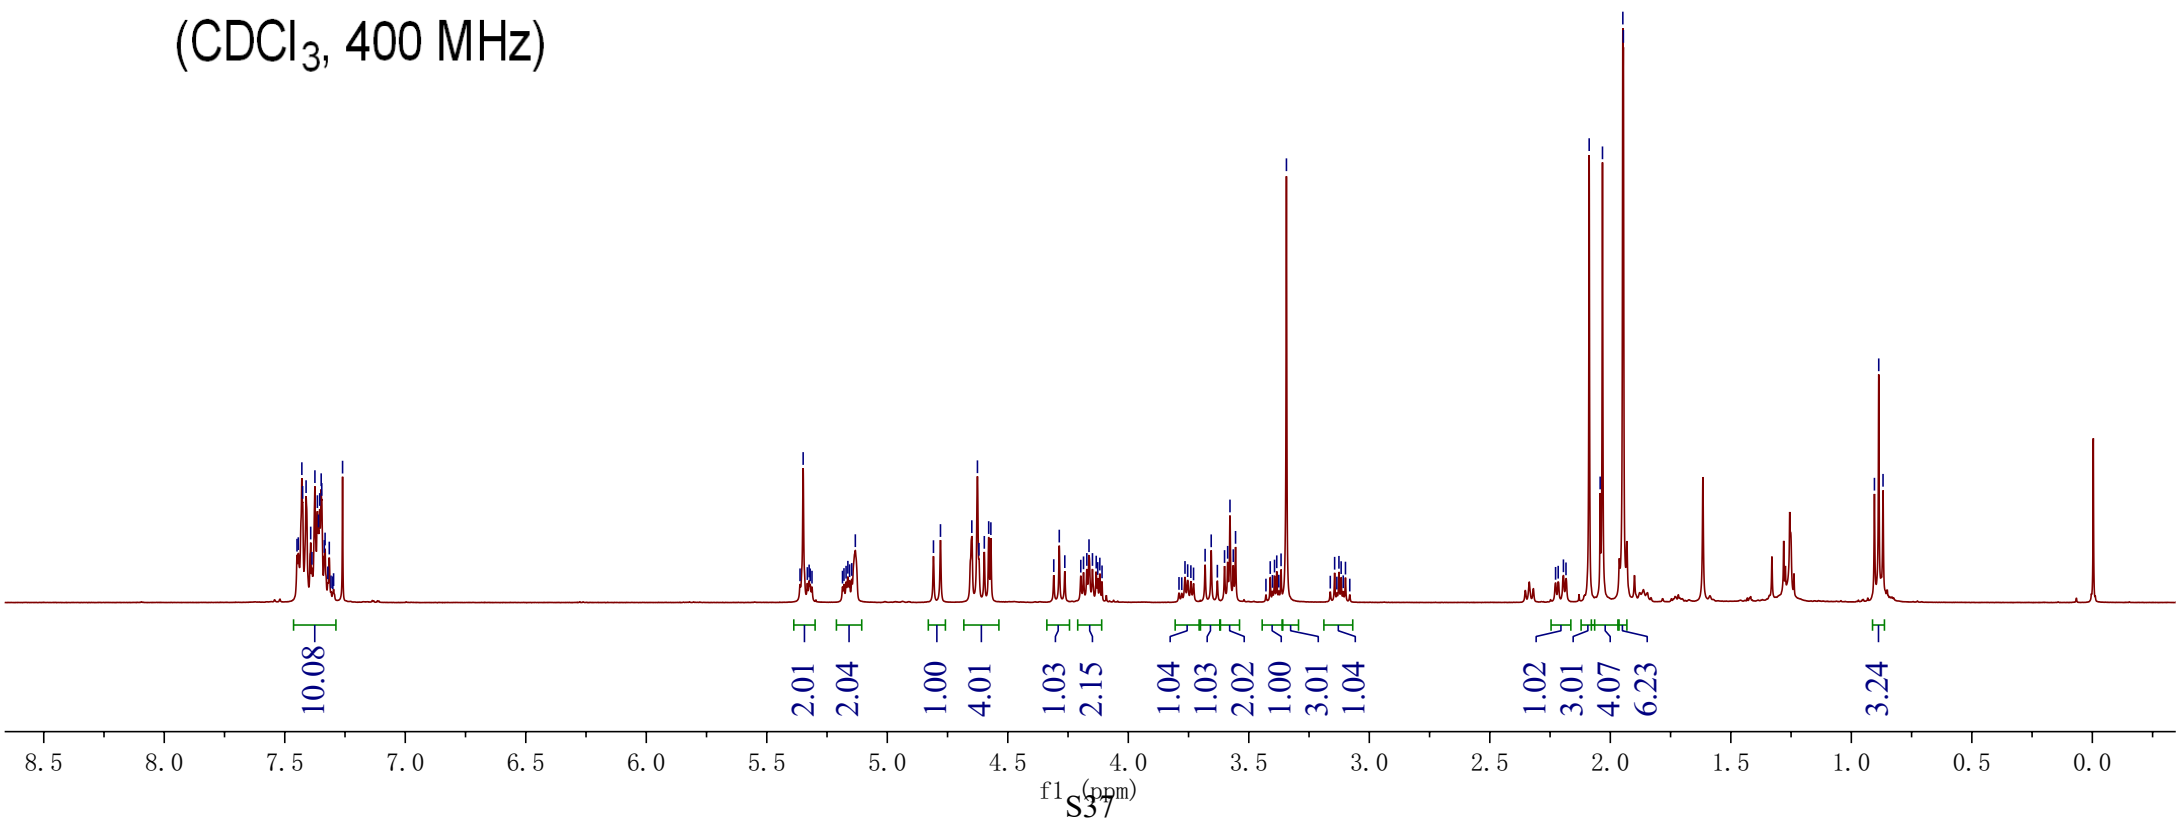

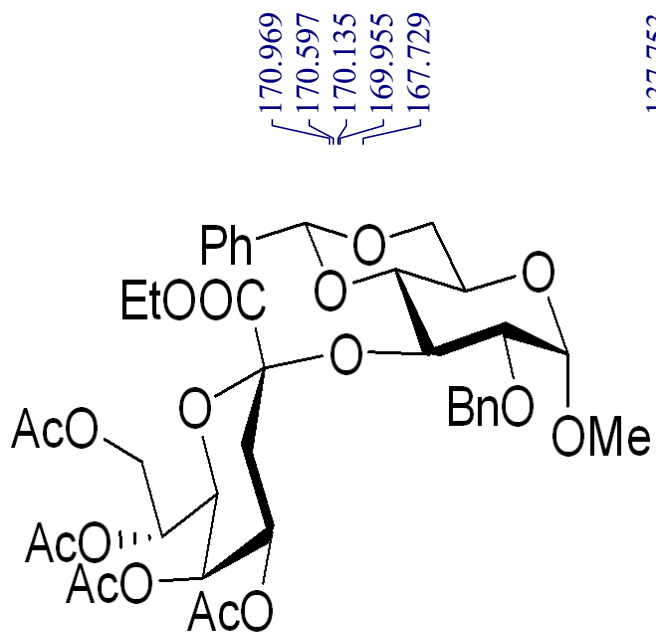

**5i**  
(CDCl<sub>3</sub>, 100 MHz)

170.969  
170.597  
170.135  
169.955  
167.729

137.753  
137.163  
129.433  
128.762  
128.680  
128.356  
126.932

102.140  
98.609  
98.586  
81.663  
79.253  
77.412  
77.200  
76.989  
73.800  
71.291  
69.278  
69.240  
68.357  
66.612  
64.764  
62.823  
62.358  
61.224  
55.426

32.874

20.990  
20.924  
20.870  
13.883

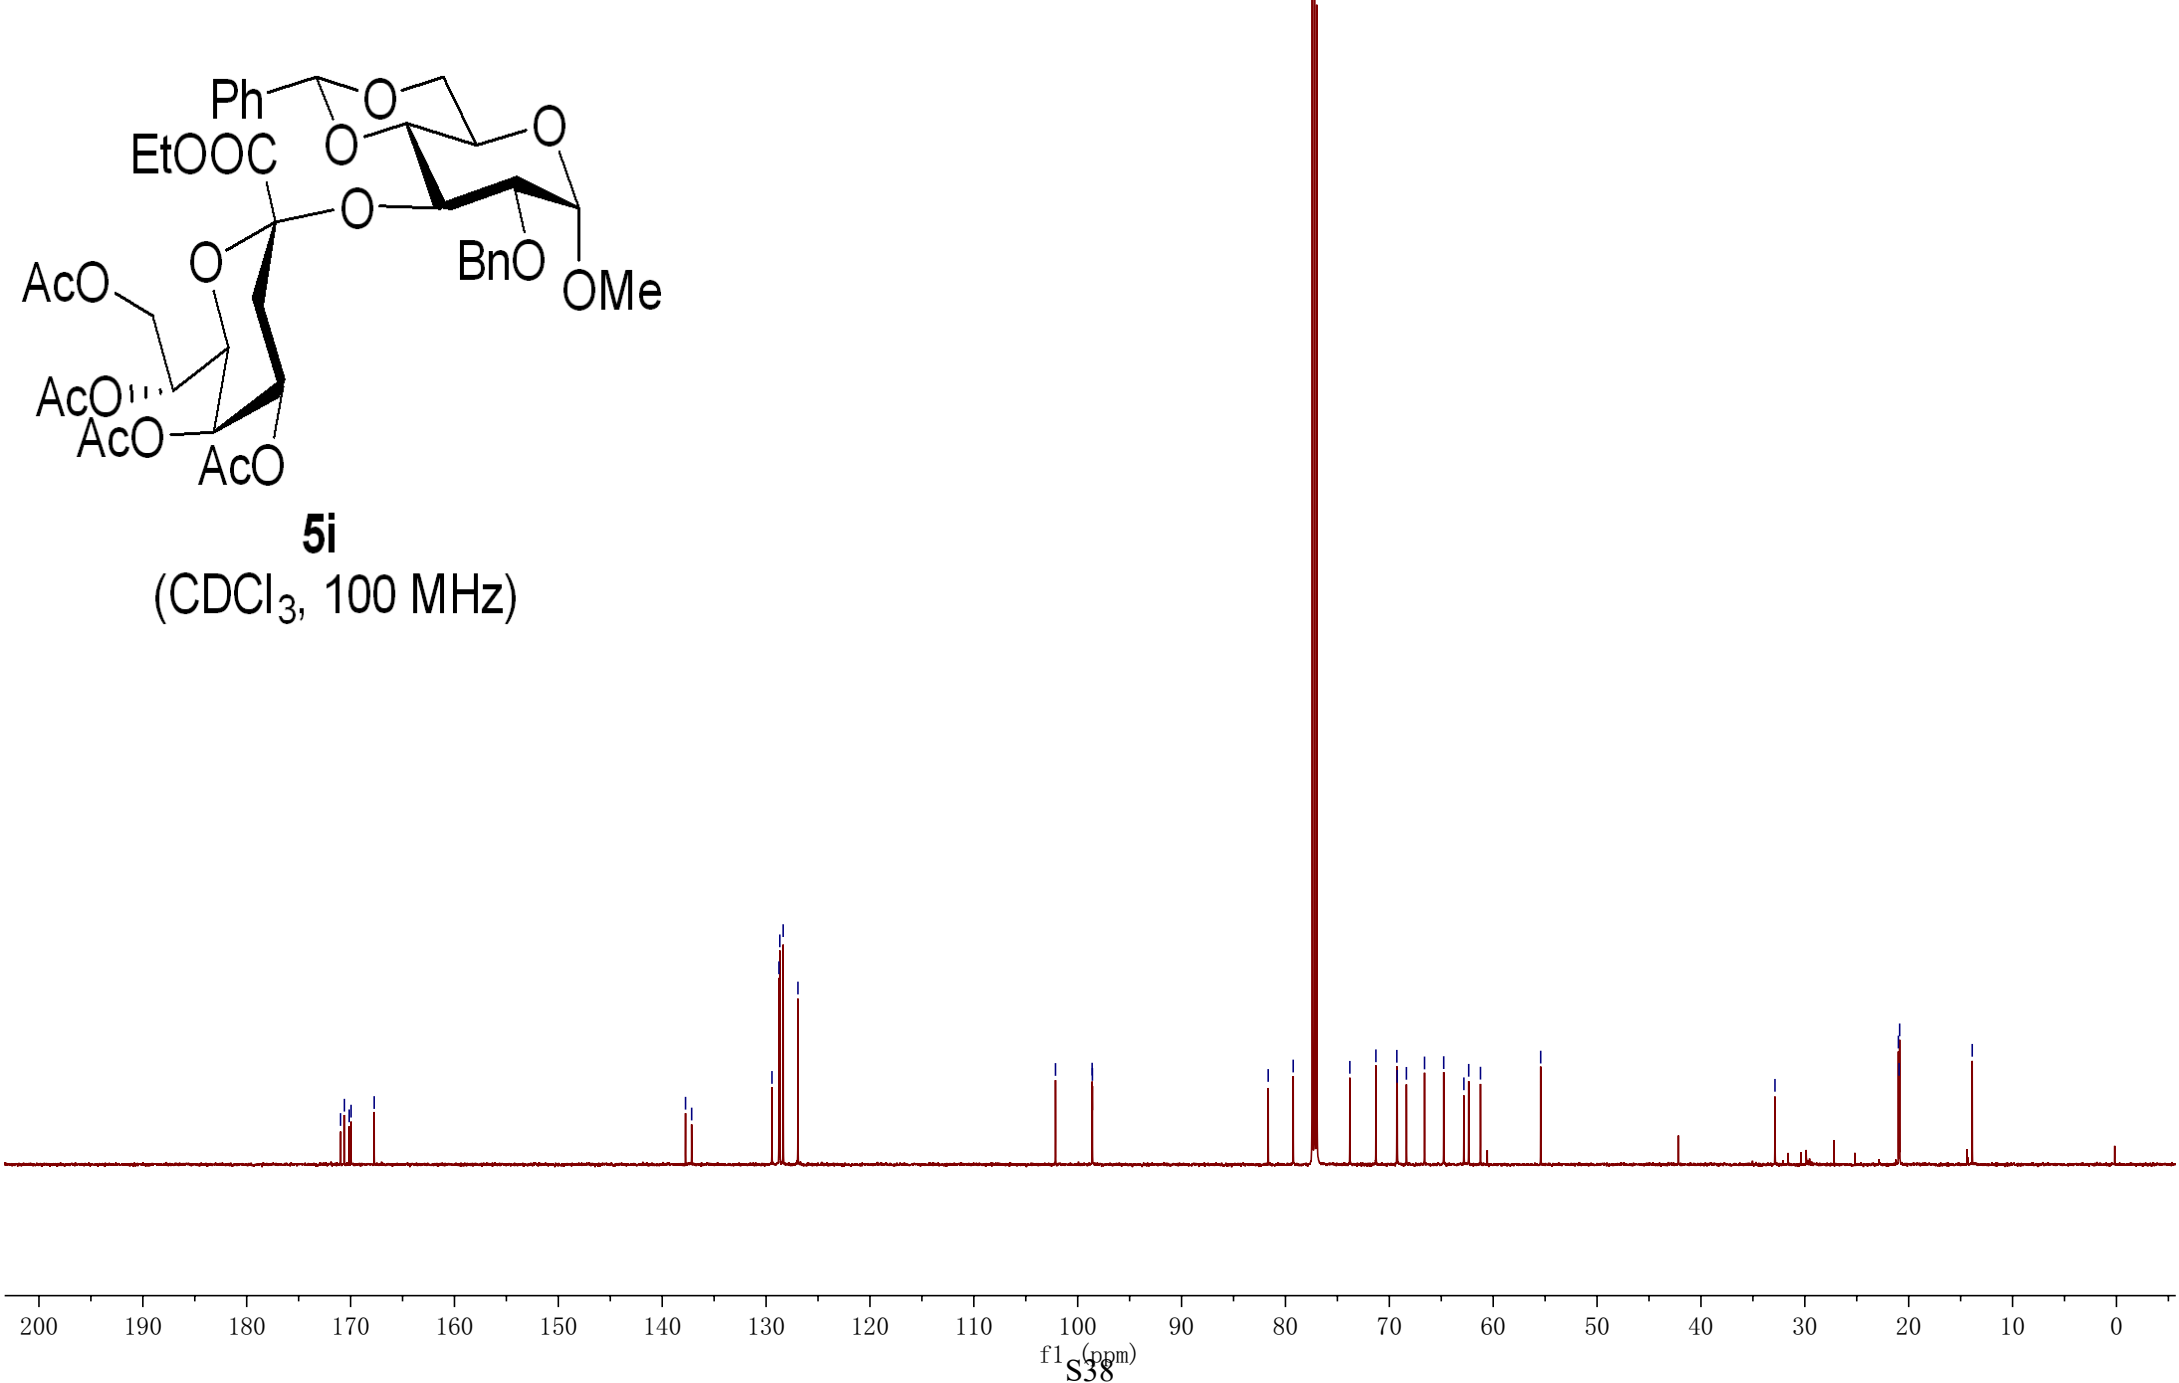

7.260  
5.923  
5.914  
5.386  
5.199  
5.197  
5.176  
5.173  
4.802  
4.795  
4.771  
4.764  
4.648  
4.639  
4.326  
4.317  
4.308  
4.299  
4.290  
4.281  
4.276  
4.264  
4.254  
4.249  
4.241  
4.237  
4.217  
4.214  
4.199  
4.191  
4.182  
4.174  
4.098  
4.090  
4.083  
4.078  
4.061  
4.048  
4.029  
4.015  
4.008  
3.994  
2.318  
2.284  
2.273  
2.168  
2.136  
2.098  
2.075  
1.985  
1.971  
1.485  
1.407  
1.371  
1.353  
1.349  
1.335  
1.305

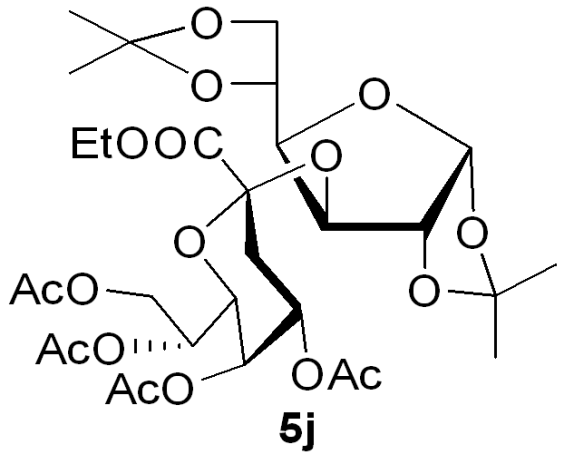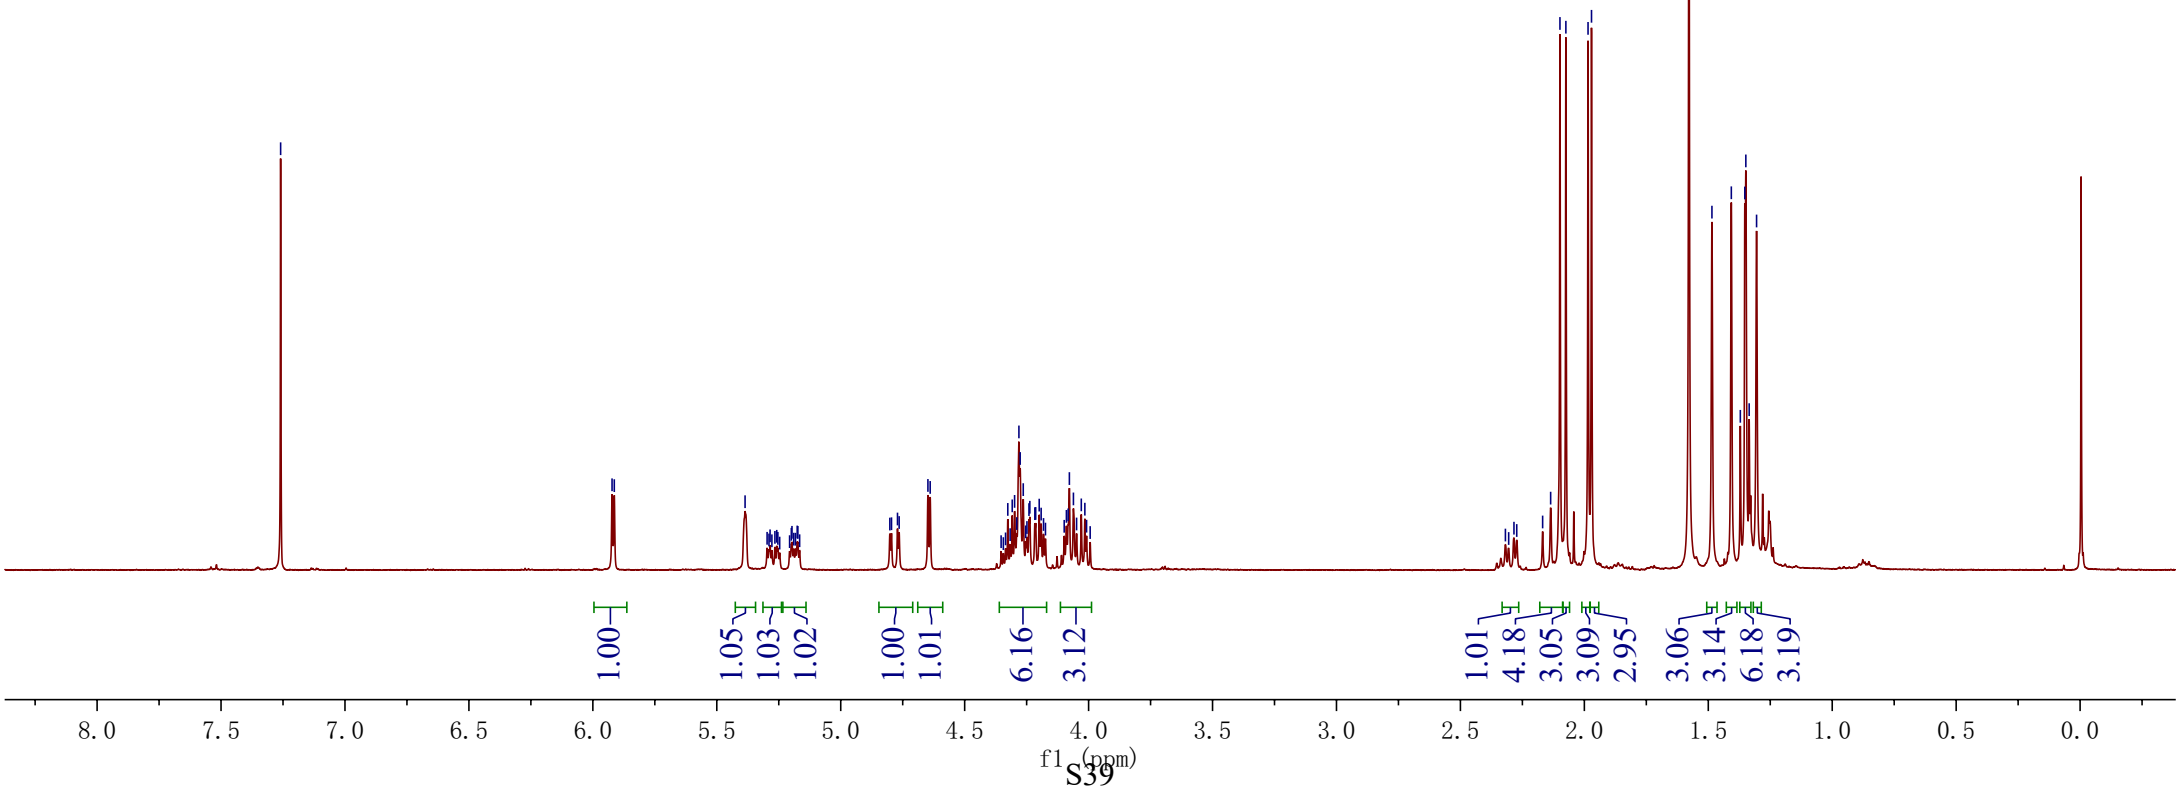

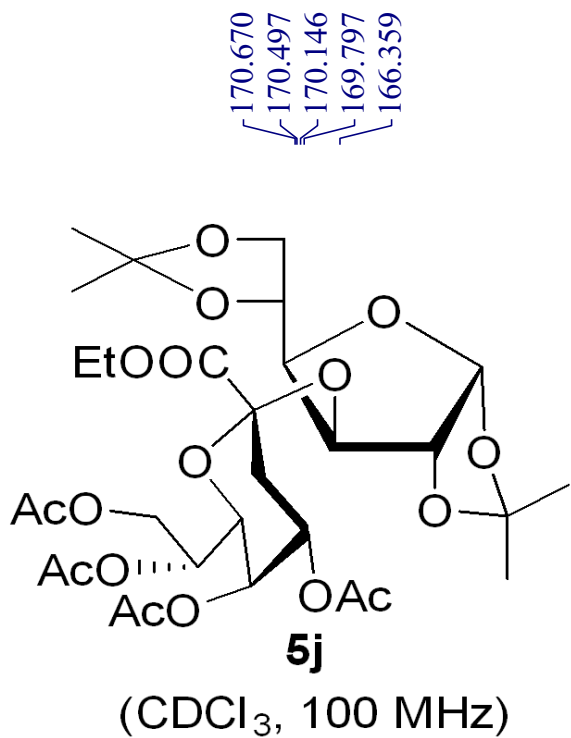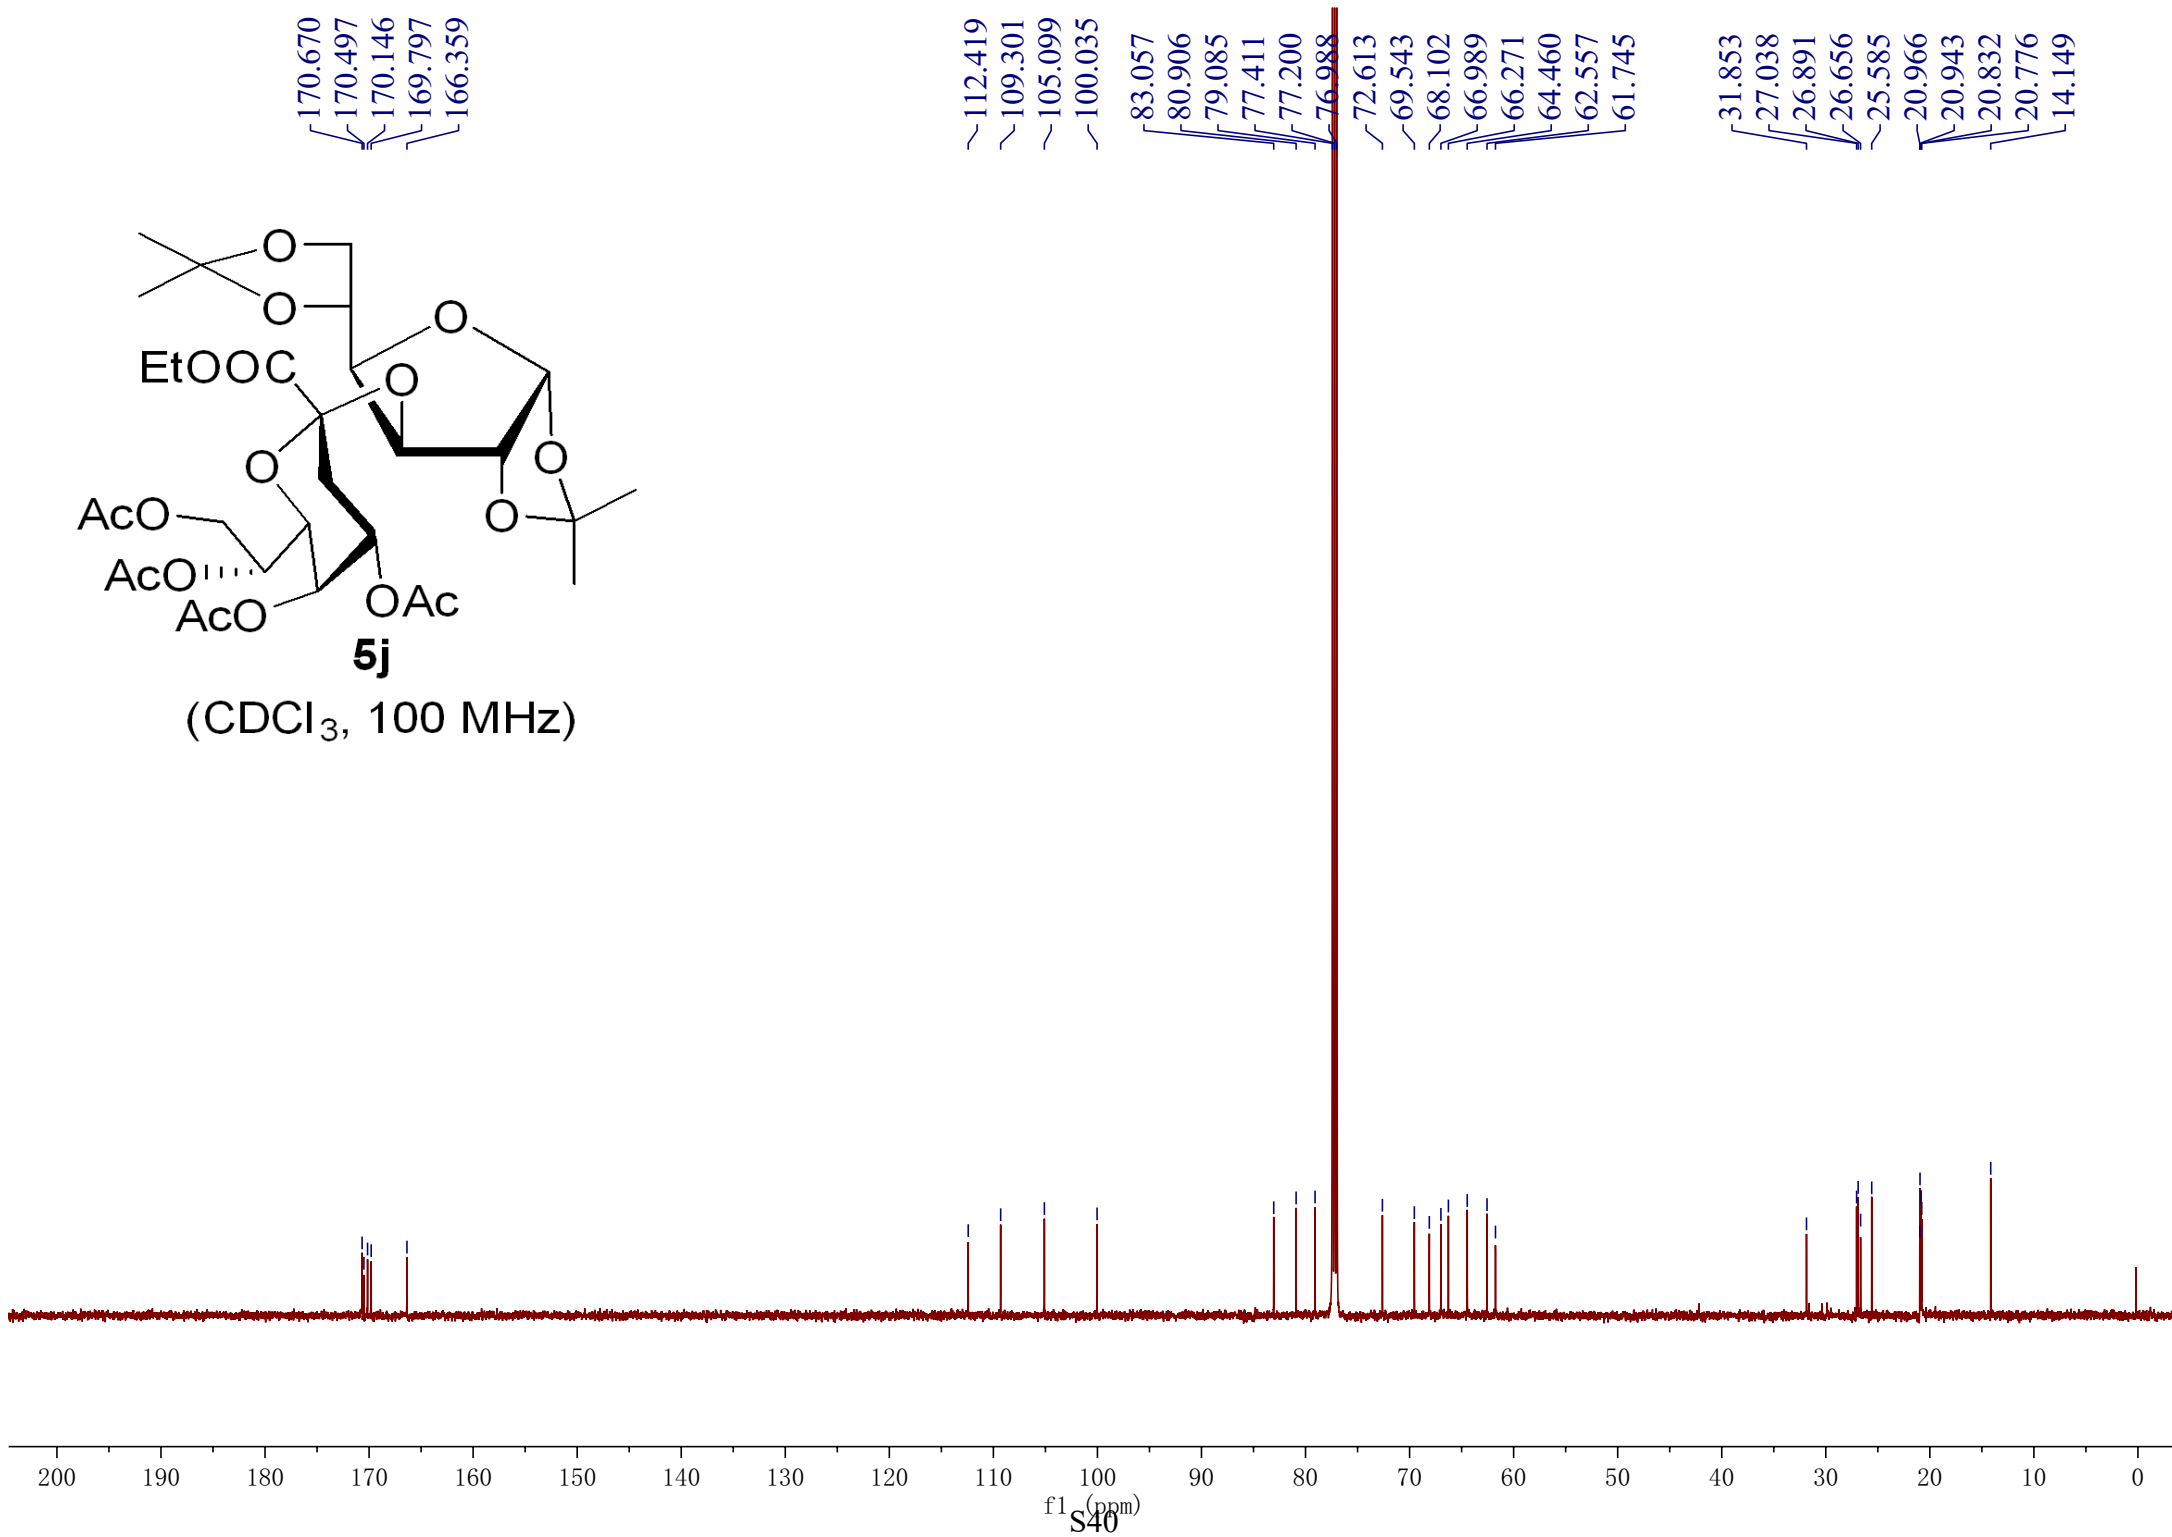



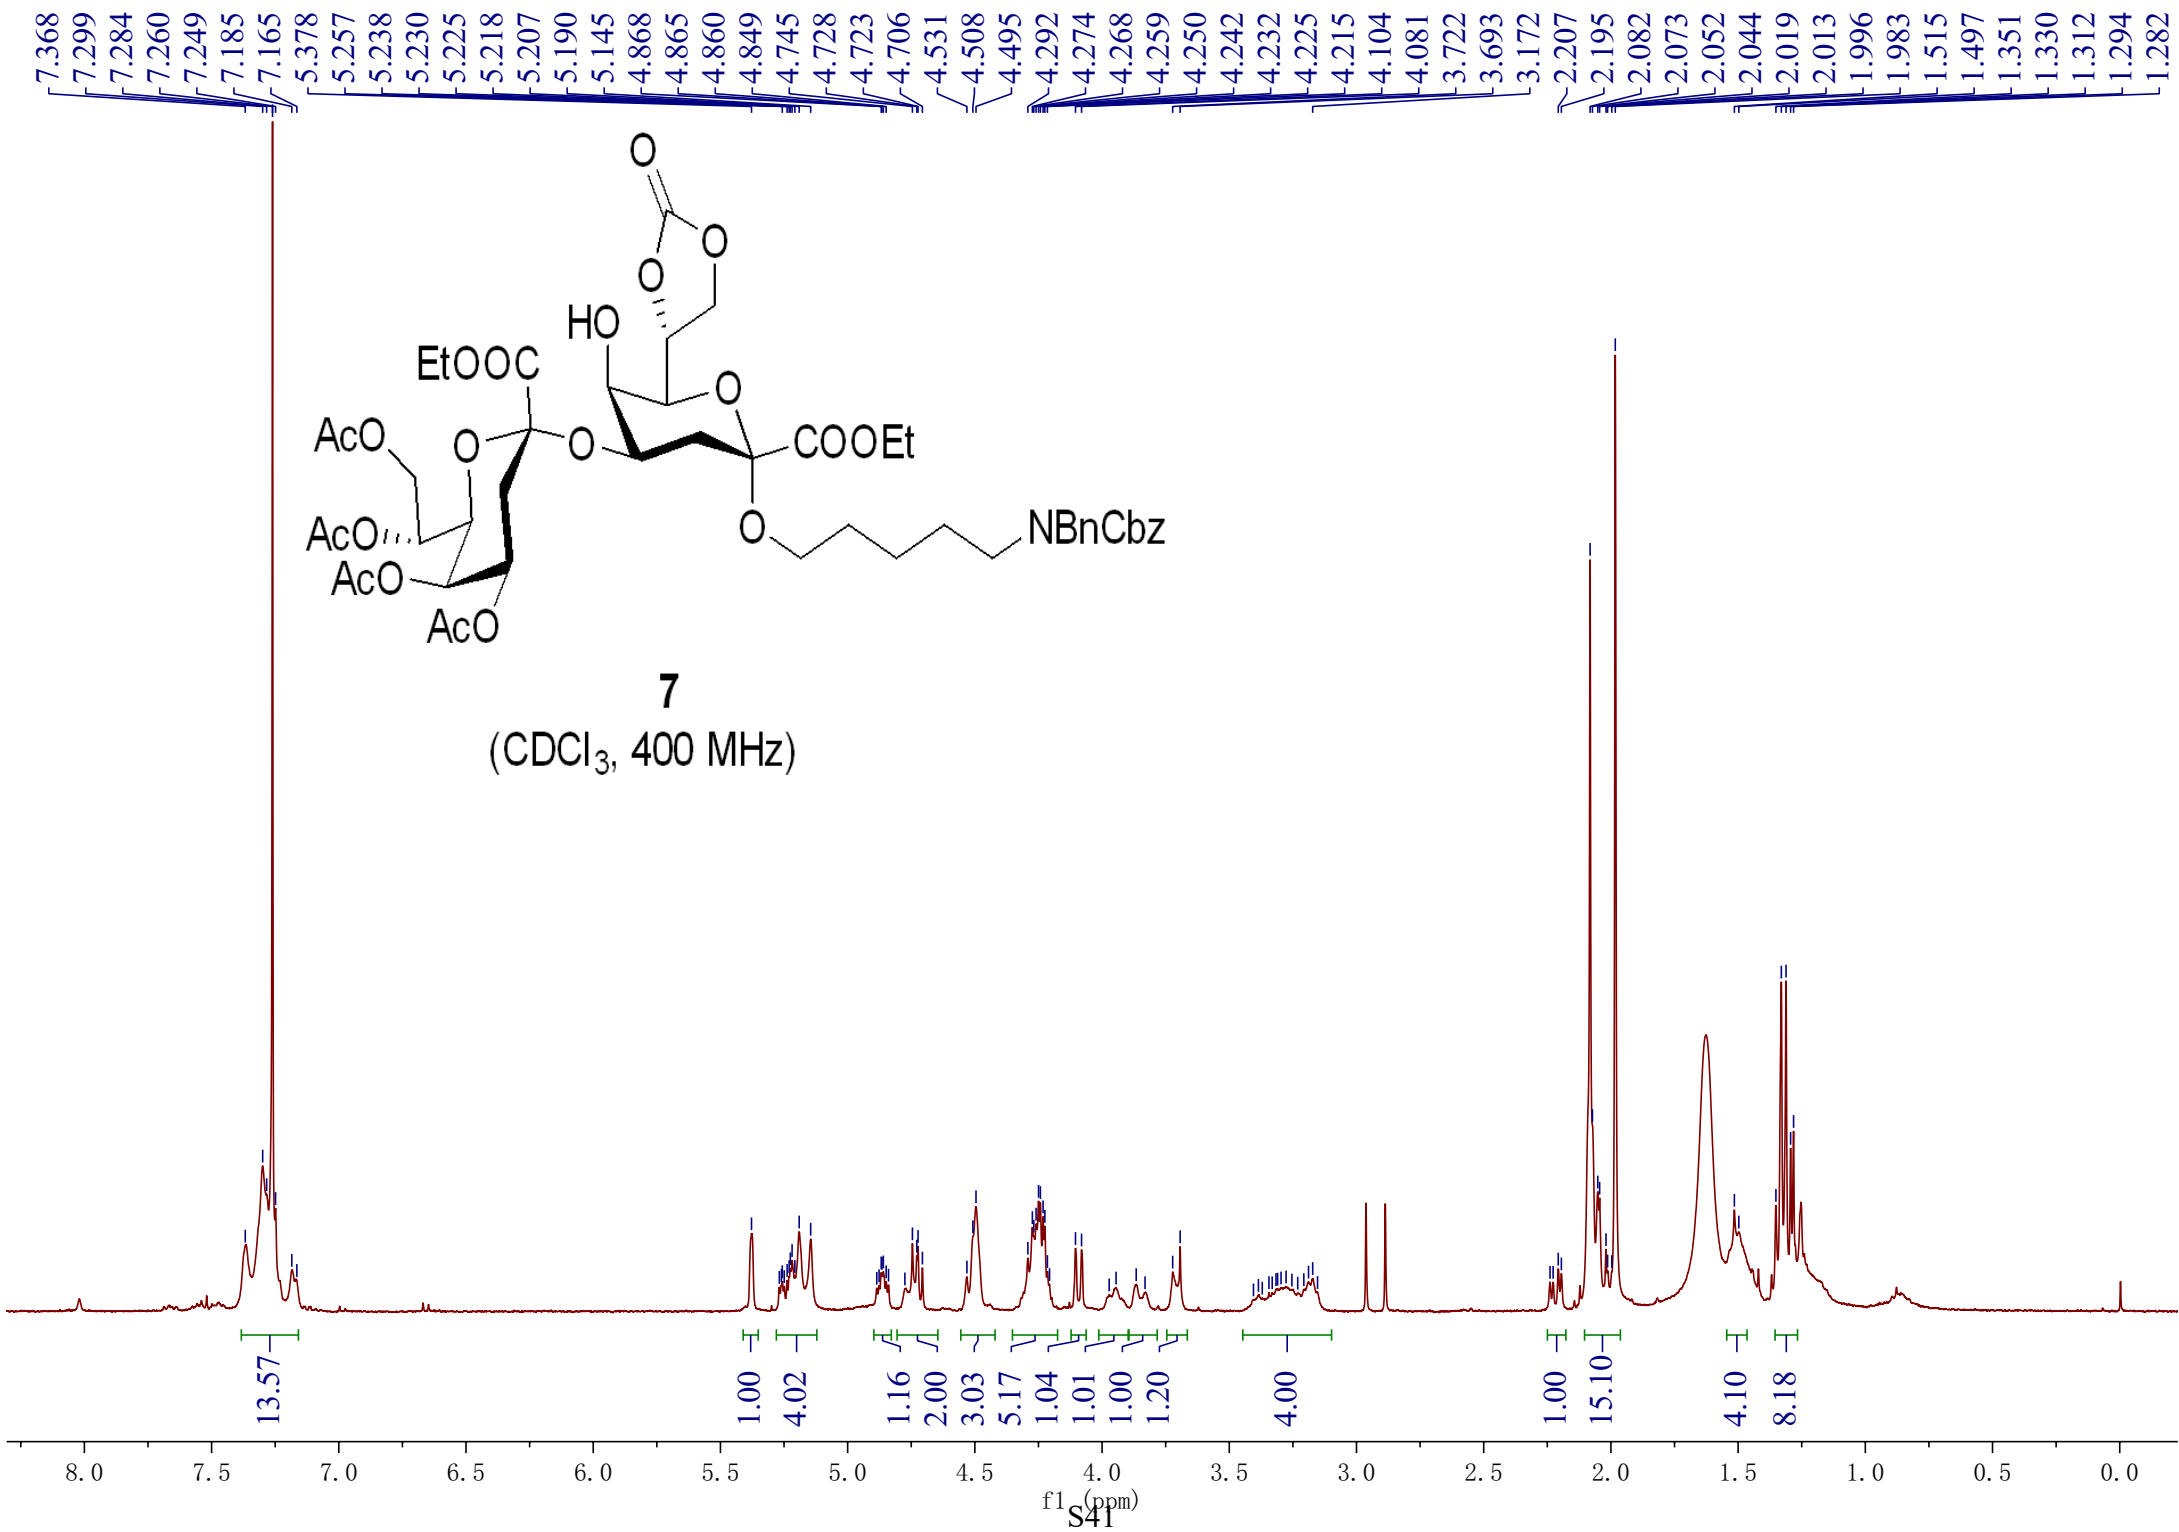

7.362  
7.298  
7.271  
7.260  
7.255  
7.237  
7.173  
7.158  
5.187  
5.152  
4.501  
4.484  
4.416  
4.402  
4.397  
4.389  
4.385  
4.370  
4.244  
4.226  
4.208  
4.191  
4.167  
4.151  
4.145  
4.129  
4.050  
3.983  
3.975  
3.962  
3.951  
3.940  
3.520  
3.495  
3.478  
3.386  
3.369  
3.254  
3.210  
3.191  
3.175  
2.164  
2.152  
2.132  
2.121  
1.856  
1.826  
1.795  
1.569  
1.551  
1.538  
1.531  
1.516  
1.393  
1.360  
1.292  
1.274  
1.256

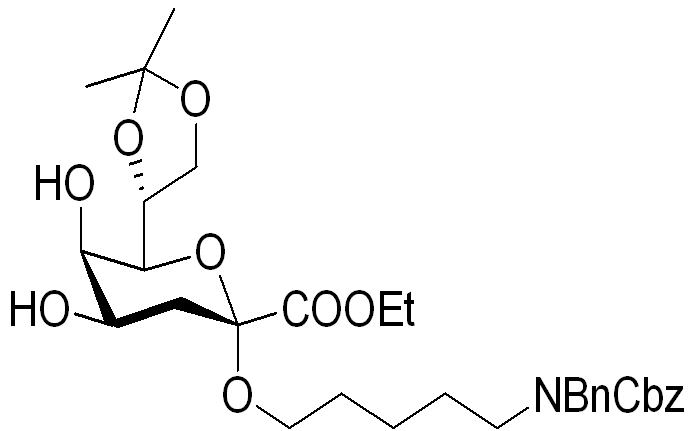

**8**

(CDCl<sub>3</sub>, 400 MHz)

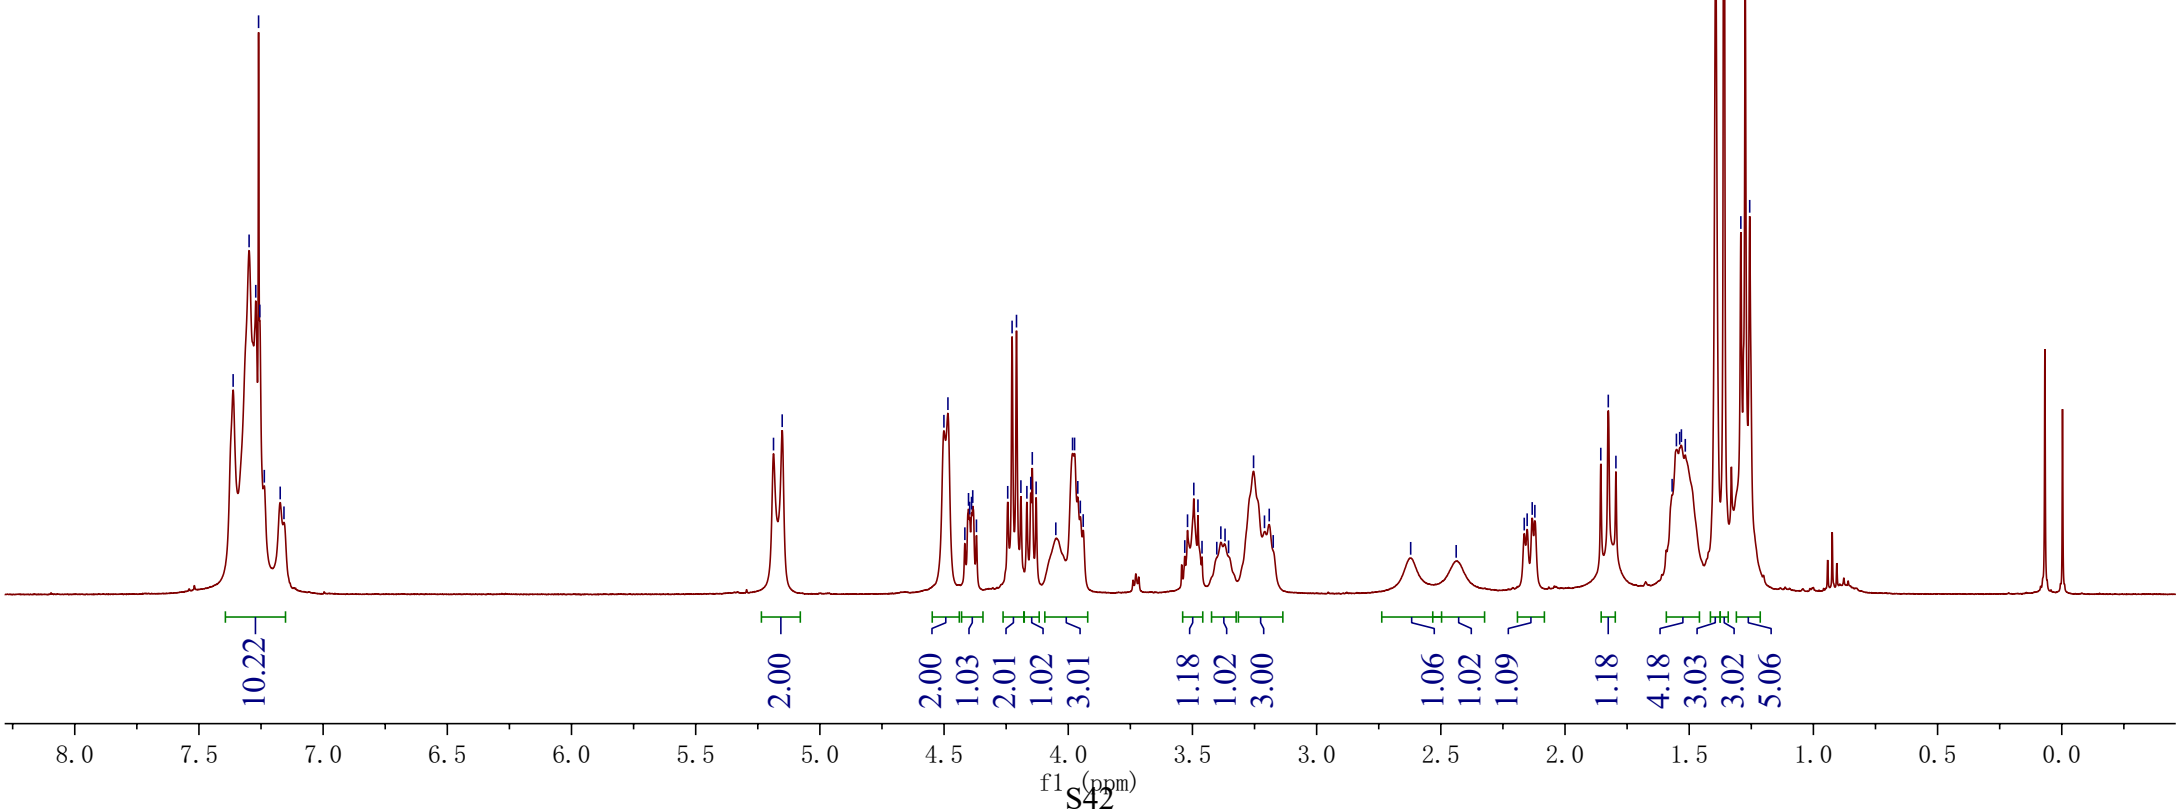

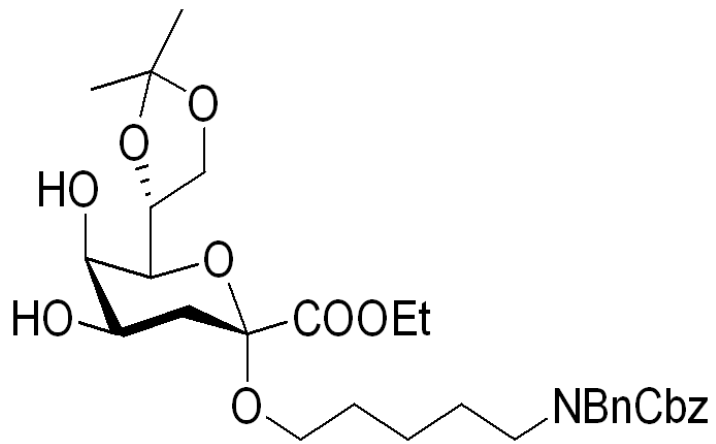

**8**

(CDCl<sub>3</sub>, 100 MHz)

—168.517

—138.001  
 —128.707  
 —128.618  
 —128.106  
 —127.972  
 —127.448  
 —127.331

—109.563

—99.010

77.518  
 77.200  
 76.882  
 73.798  
 72.886  
 67.364  
 67.249  
 66.901  
 65.928  
 63.751  
 61.908  
 50.609  
 50.336  
 47.200  
 46.246

35.174  
 29.385  
 27.699  
 27.072  
 25.454  
 23.651  
 14.295

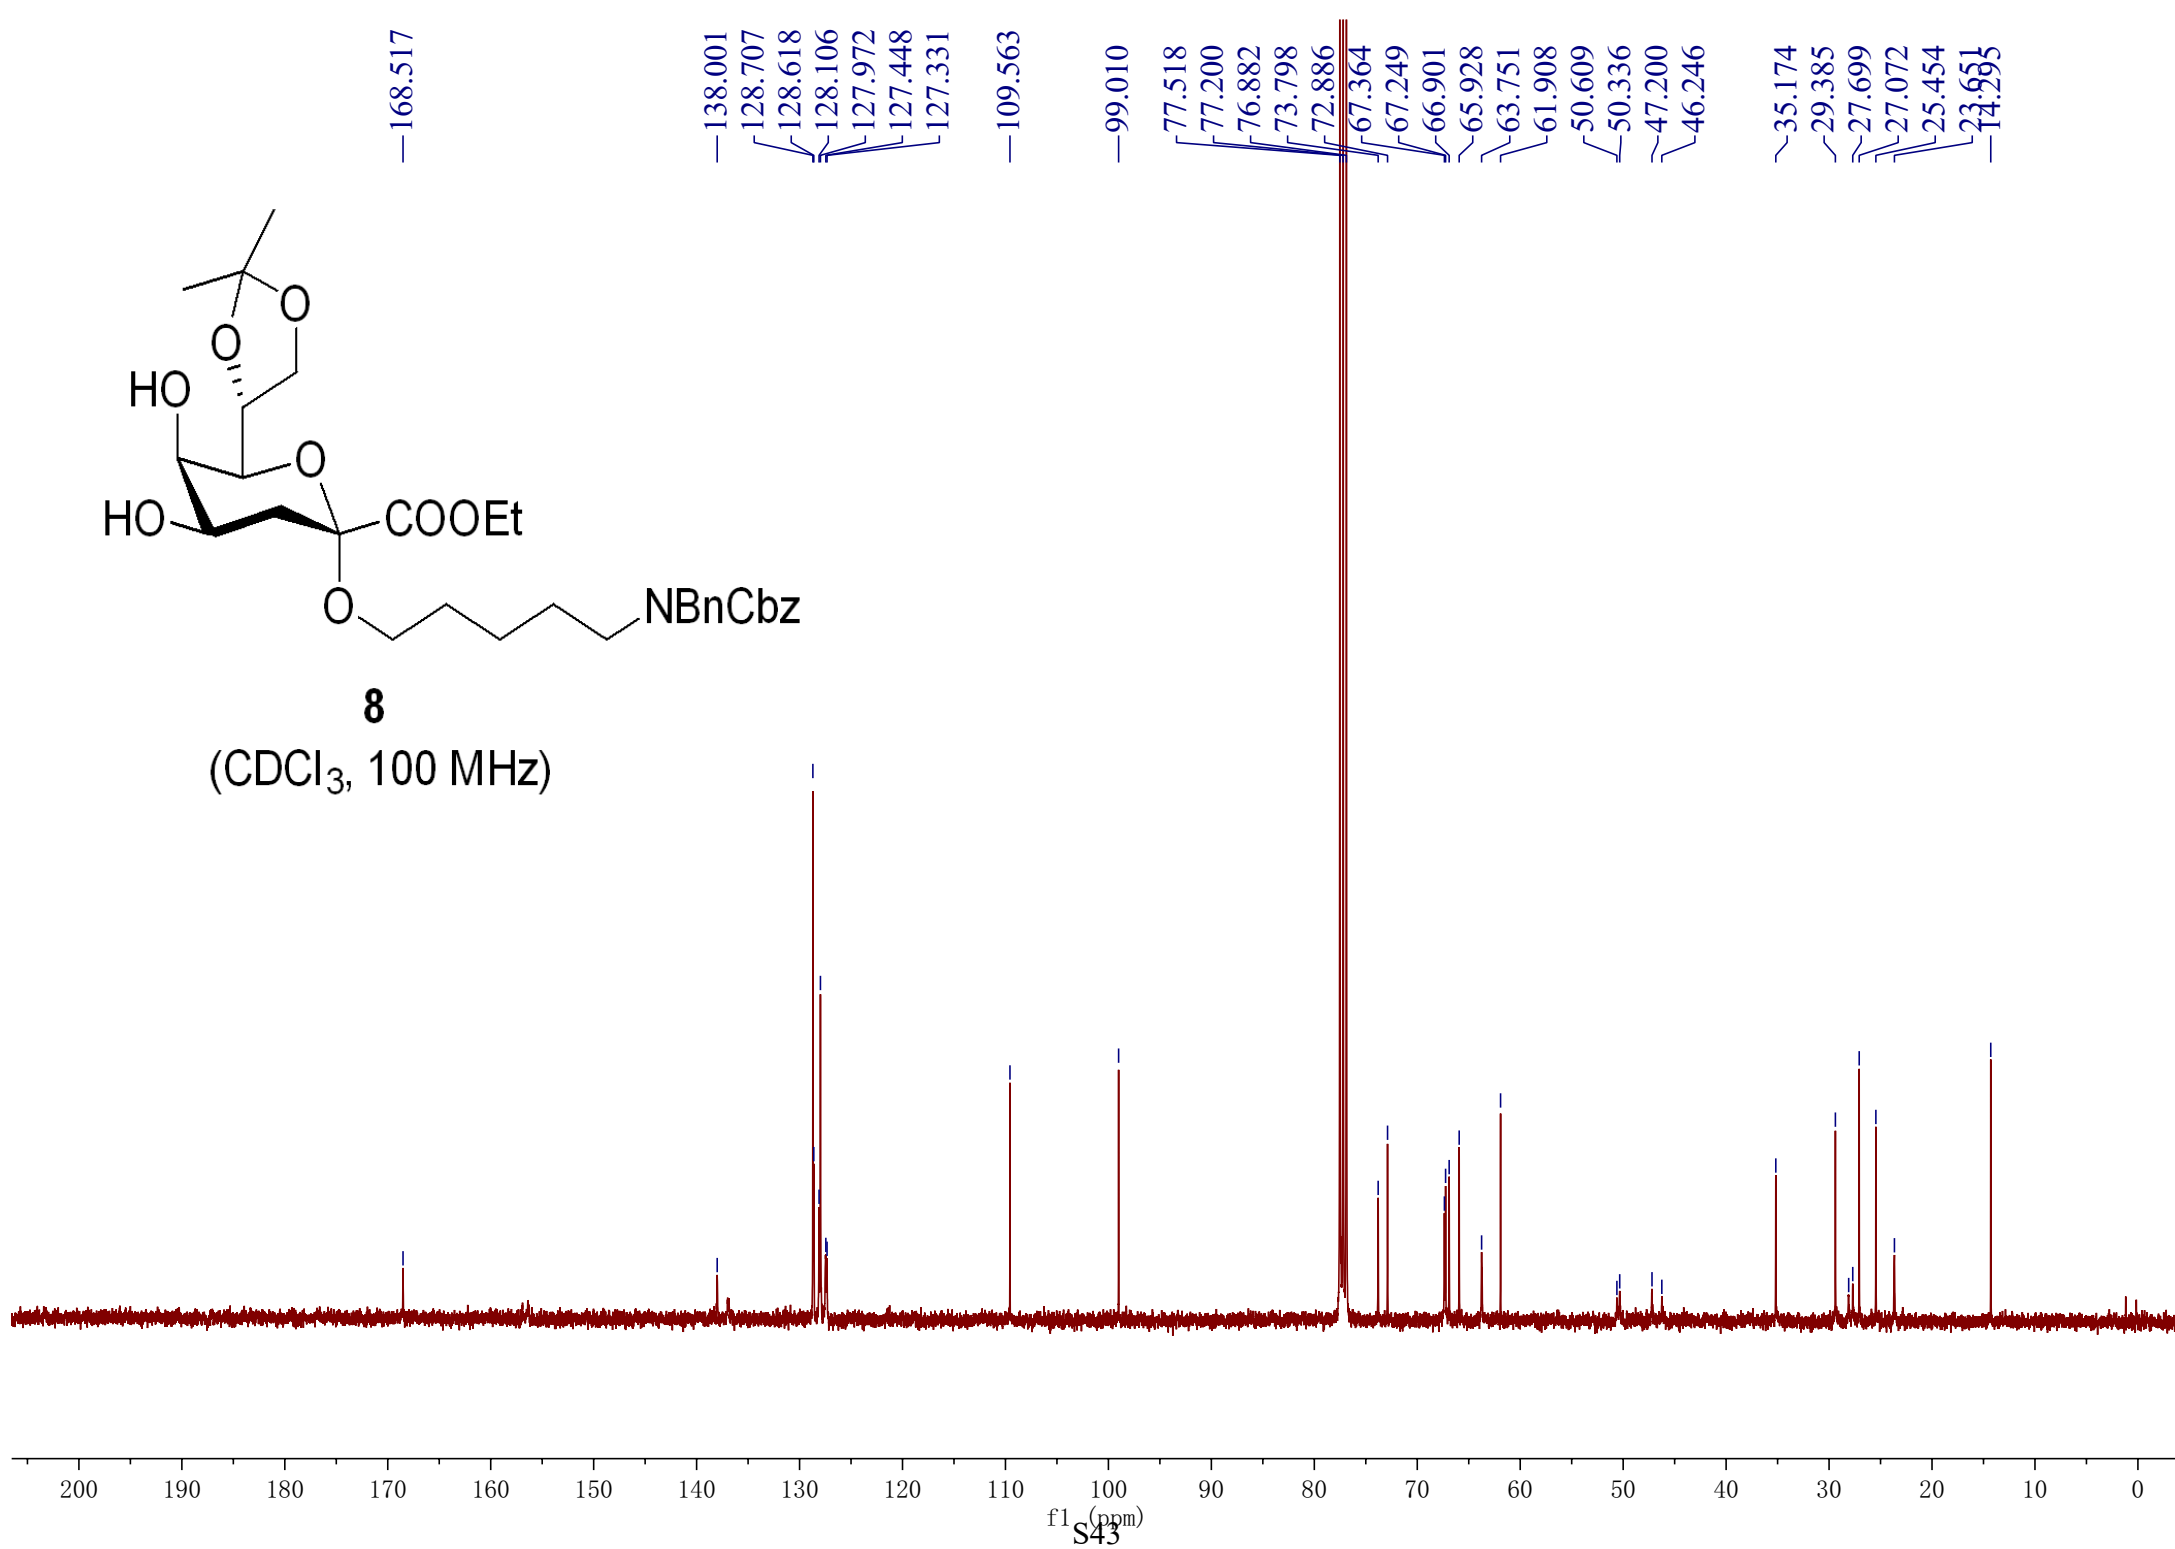

7.355  
7.288  
7.260  
7.243  
7.174  
7.159  
5.377  
5.305  
5.292  
5.286  
5.274  
5.266  
5.263  
5.199  
5.178  
5.142  
4.479  
4.380  
4.361  
4.271  
4.249  
4.230  
4.212  
4.195  
4.169  
4.144  
4.131  
4.115  
4.110  
4.094  
3.955  
3.943  
3.934  
3.750  
3.397  
3.381  
3.242  
3.229  
3.179  
3.163  
2.305  
2.293  
2.272  
2.261  
2.109  
2.085  
2.070  
2.048  
2.045  
1.976  
1.971  
1.503  
1.490  
1.353  
1.333  
1.312  
1.295  
1.277

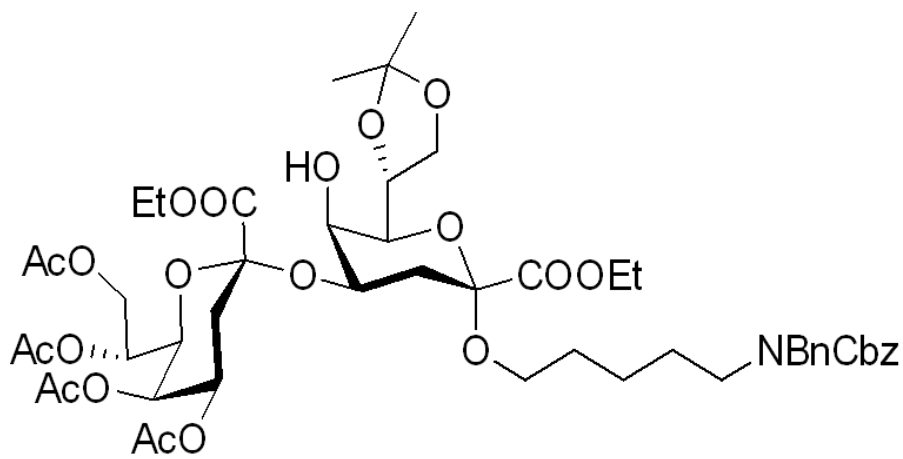

**9**

(CDCl<sub>3</sub>, 400 MHz)

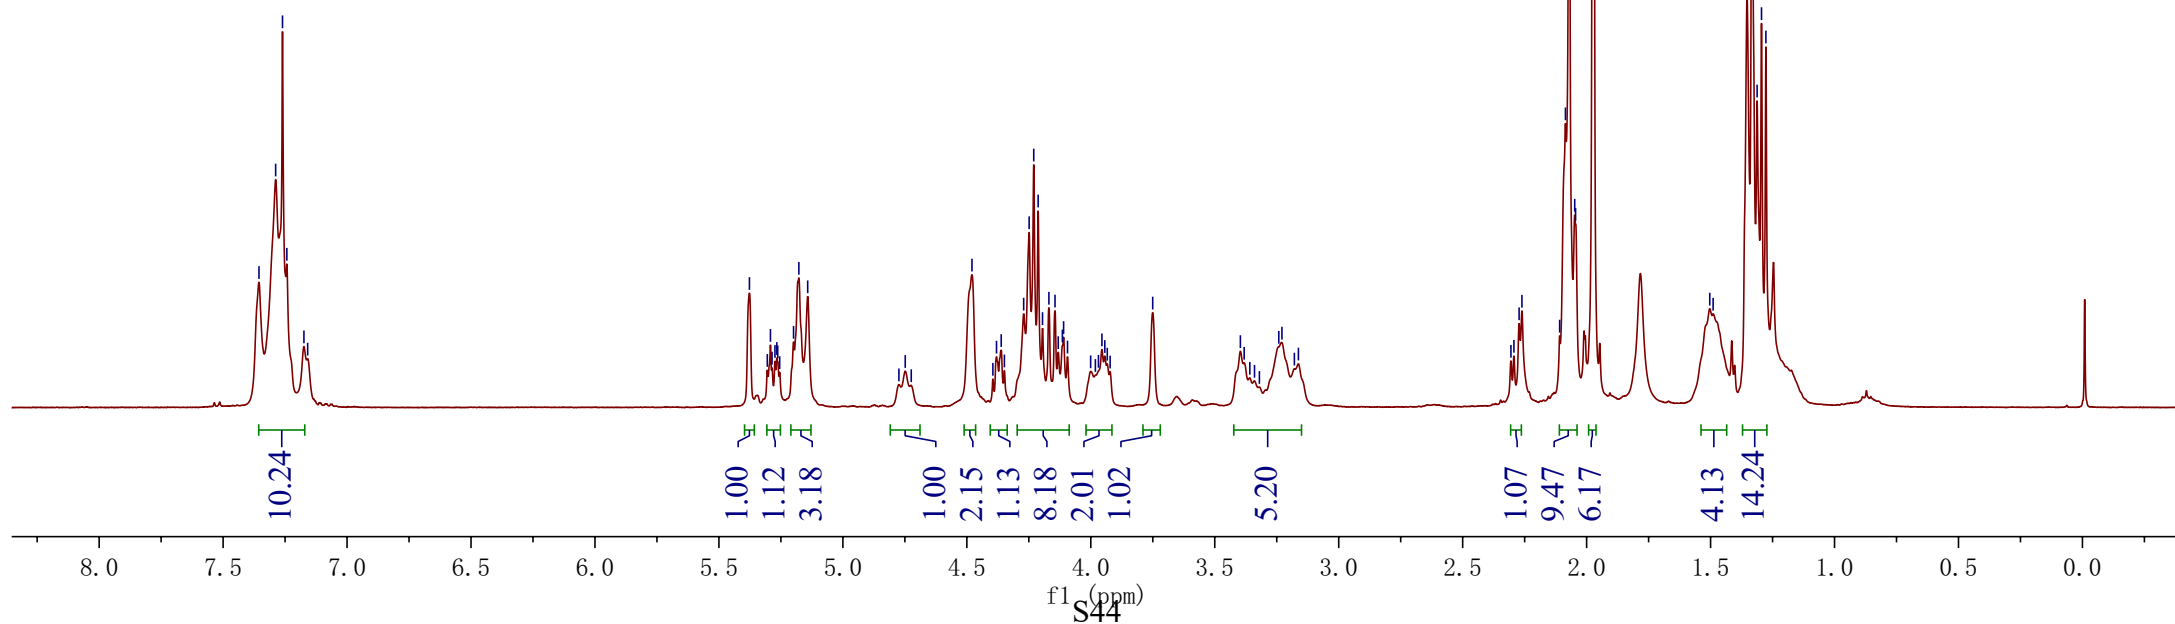

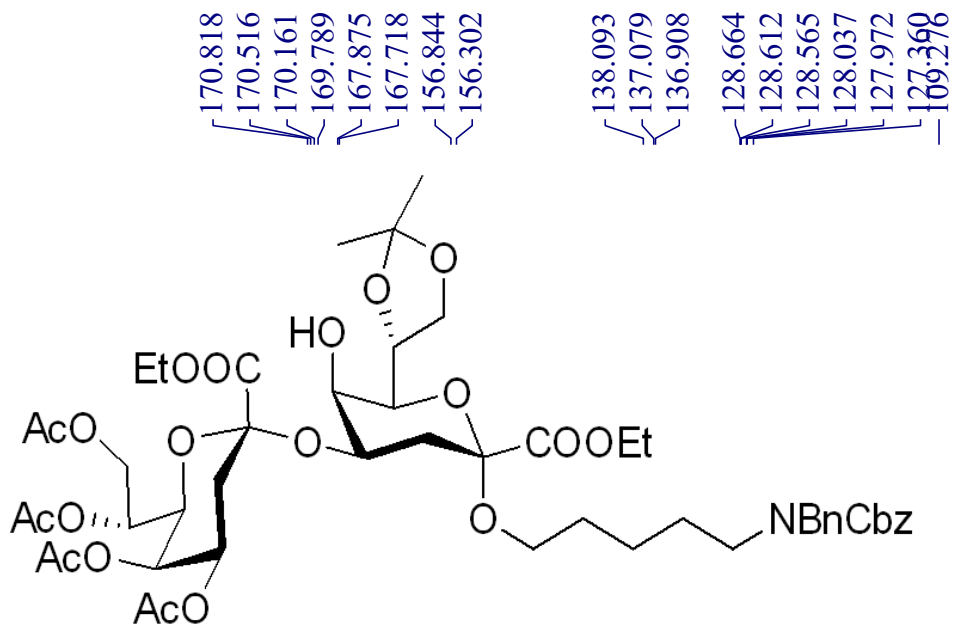

**9**

(CDCl<sub>3</sub>, 100 MHz)

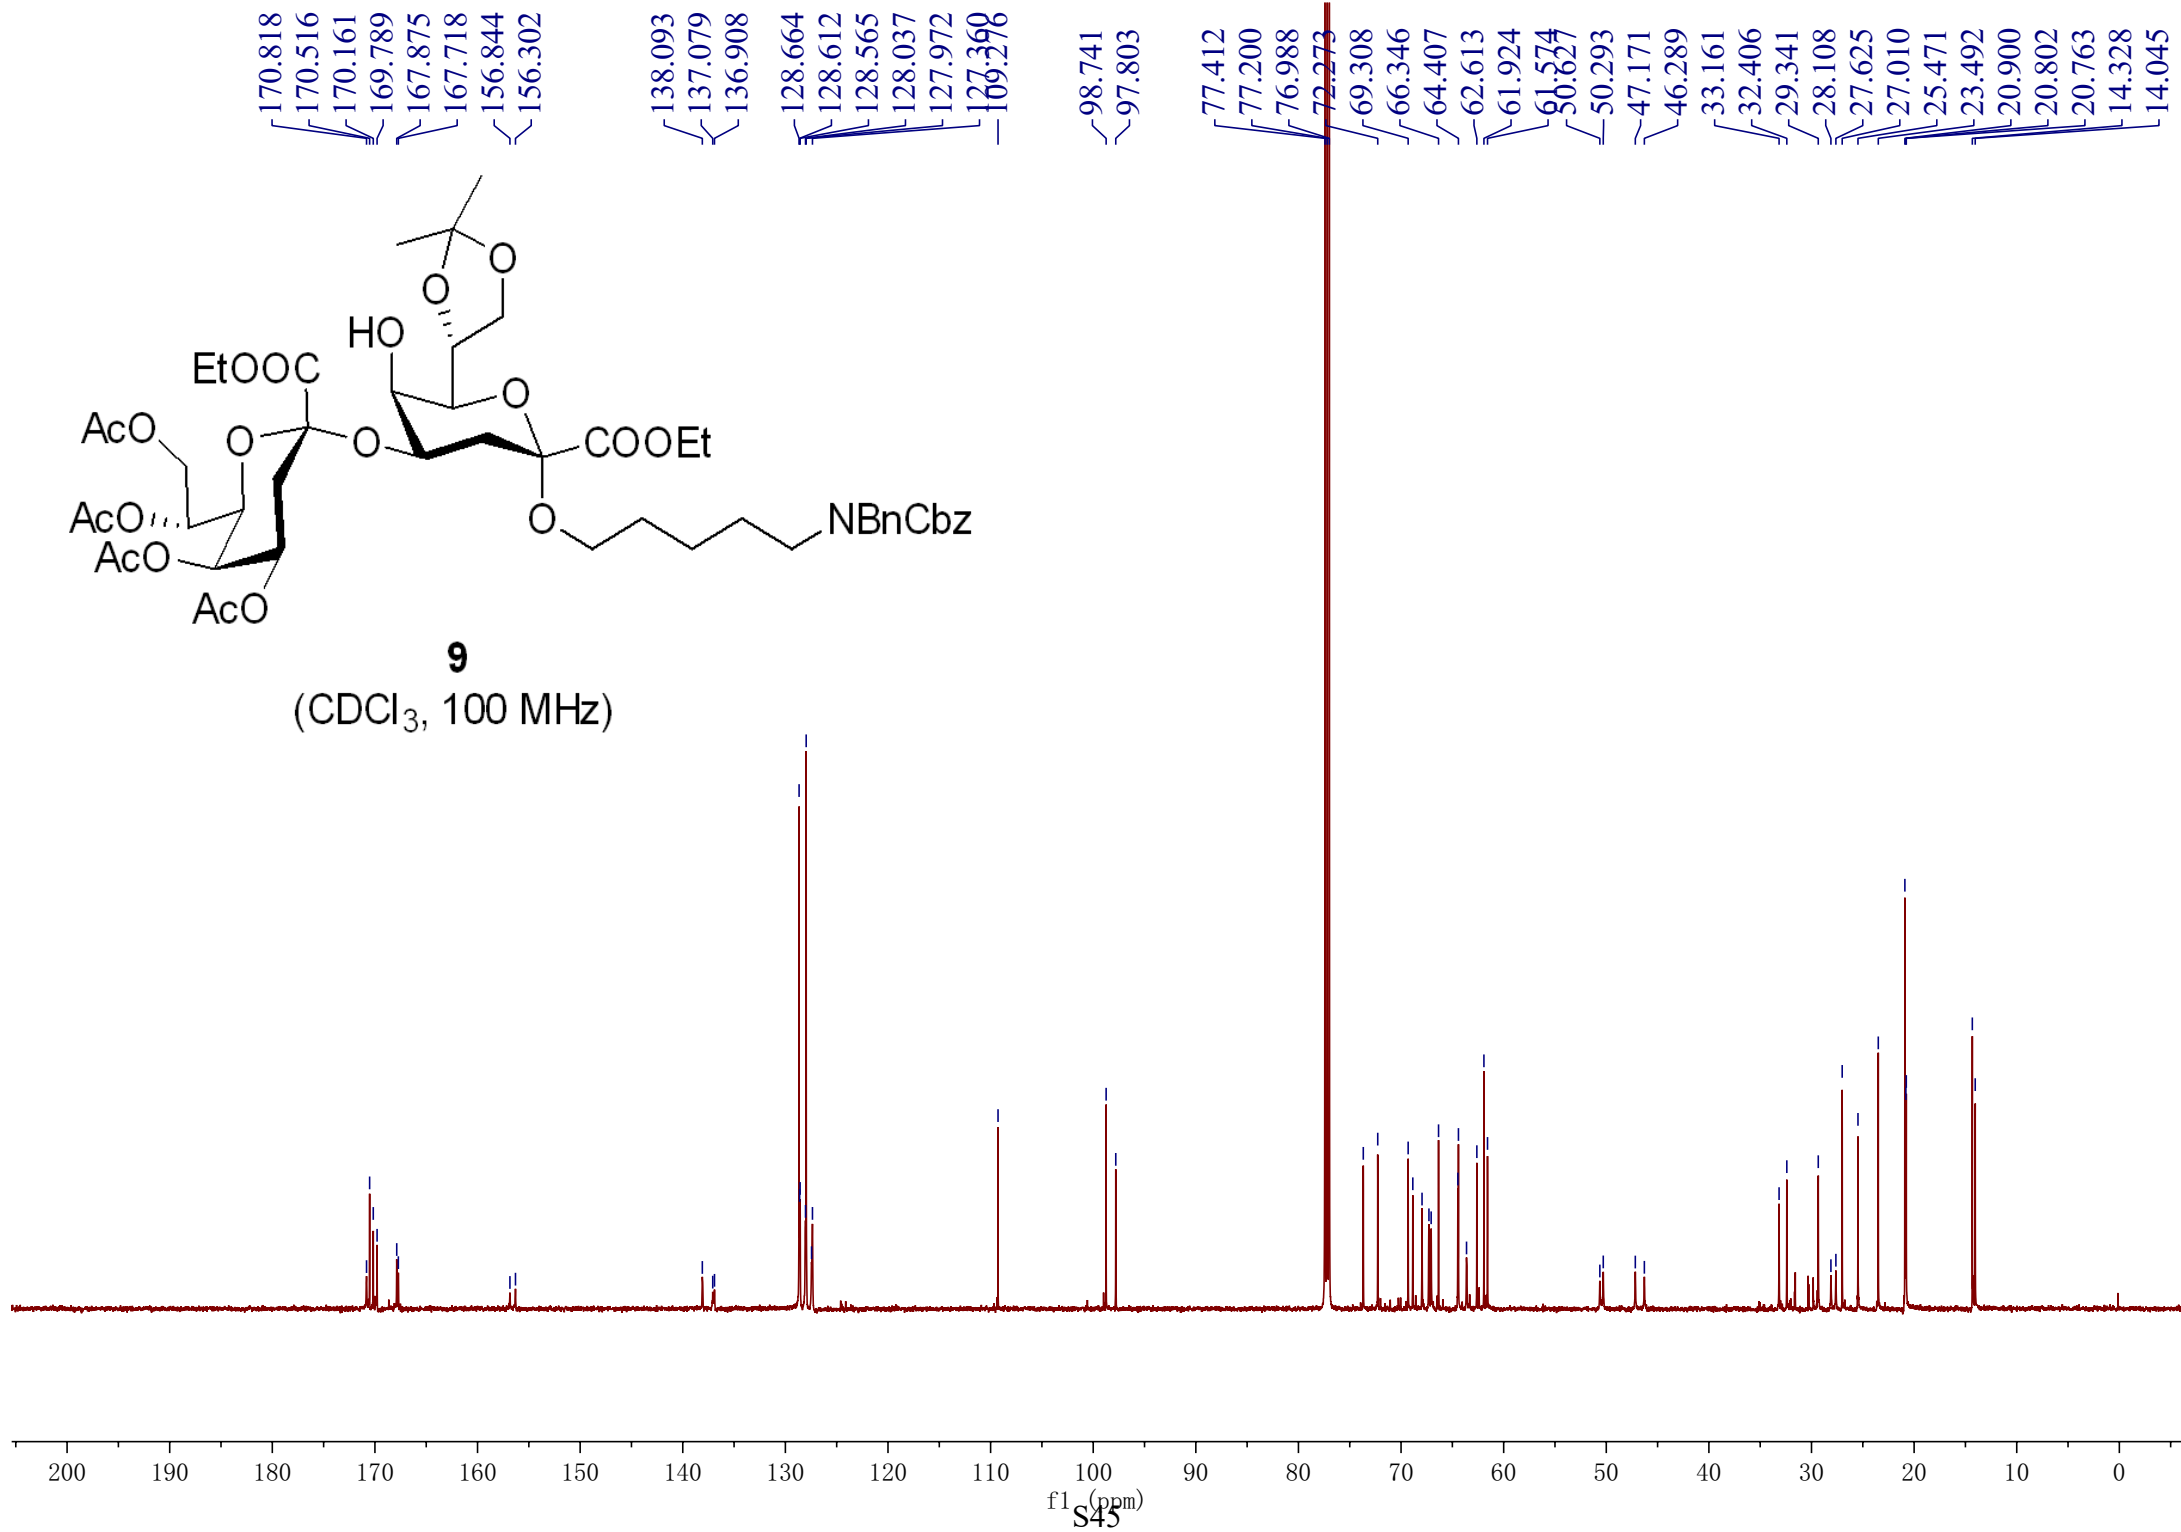

7.363  
7.296  
7.266  
7.250  
7.185  
5.344  
5.272  
5.231  
5.224  
5.218  
5.211  
5.189  
5.154  
5.133  
4.753  
4.723  
4.627  
4.620  
4.610  
4.603  
4.496  
4.311  
4.293  
4.285  
4.275  
4.257  
4.240  
4.222  
4.149  
4.125  
4.095  
4.077  
4.064  
4.014  
3.991  
3.979  
3.603  
3.593  
3.266  
3.250  
3.200  
3.185  
2.186  
2.153  
2.137  
2.115  
2.096  
2.070  
2.025  
1.992  
1.977  
1.526  
1.372  
1.356  
1.335  
1.318  
1.300  
1.256

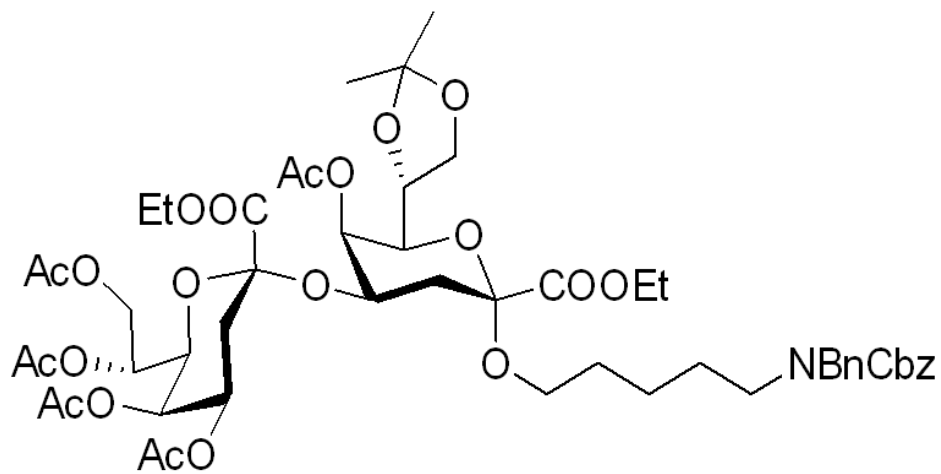

**10**  
(CDCl<sub>3</sub>, 400 MHz)

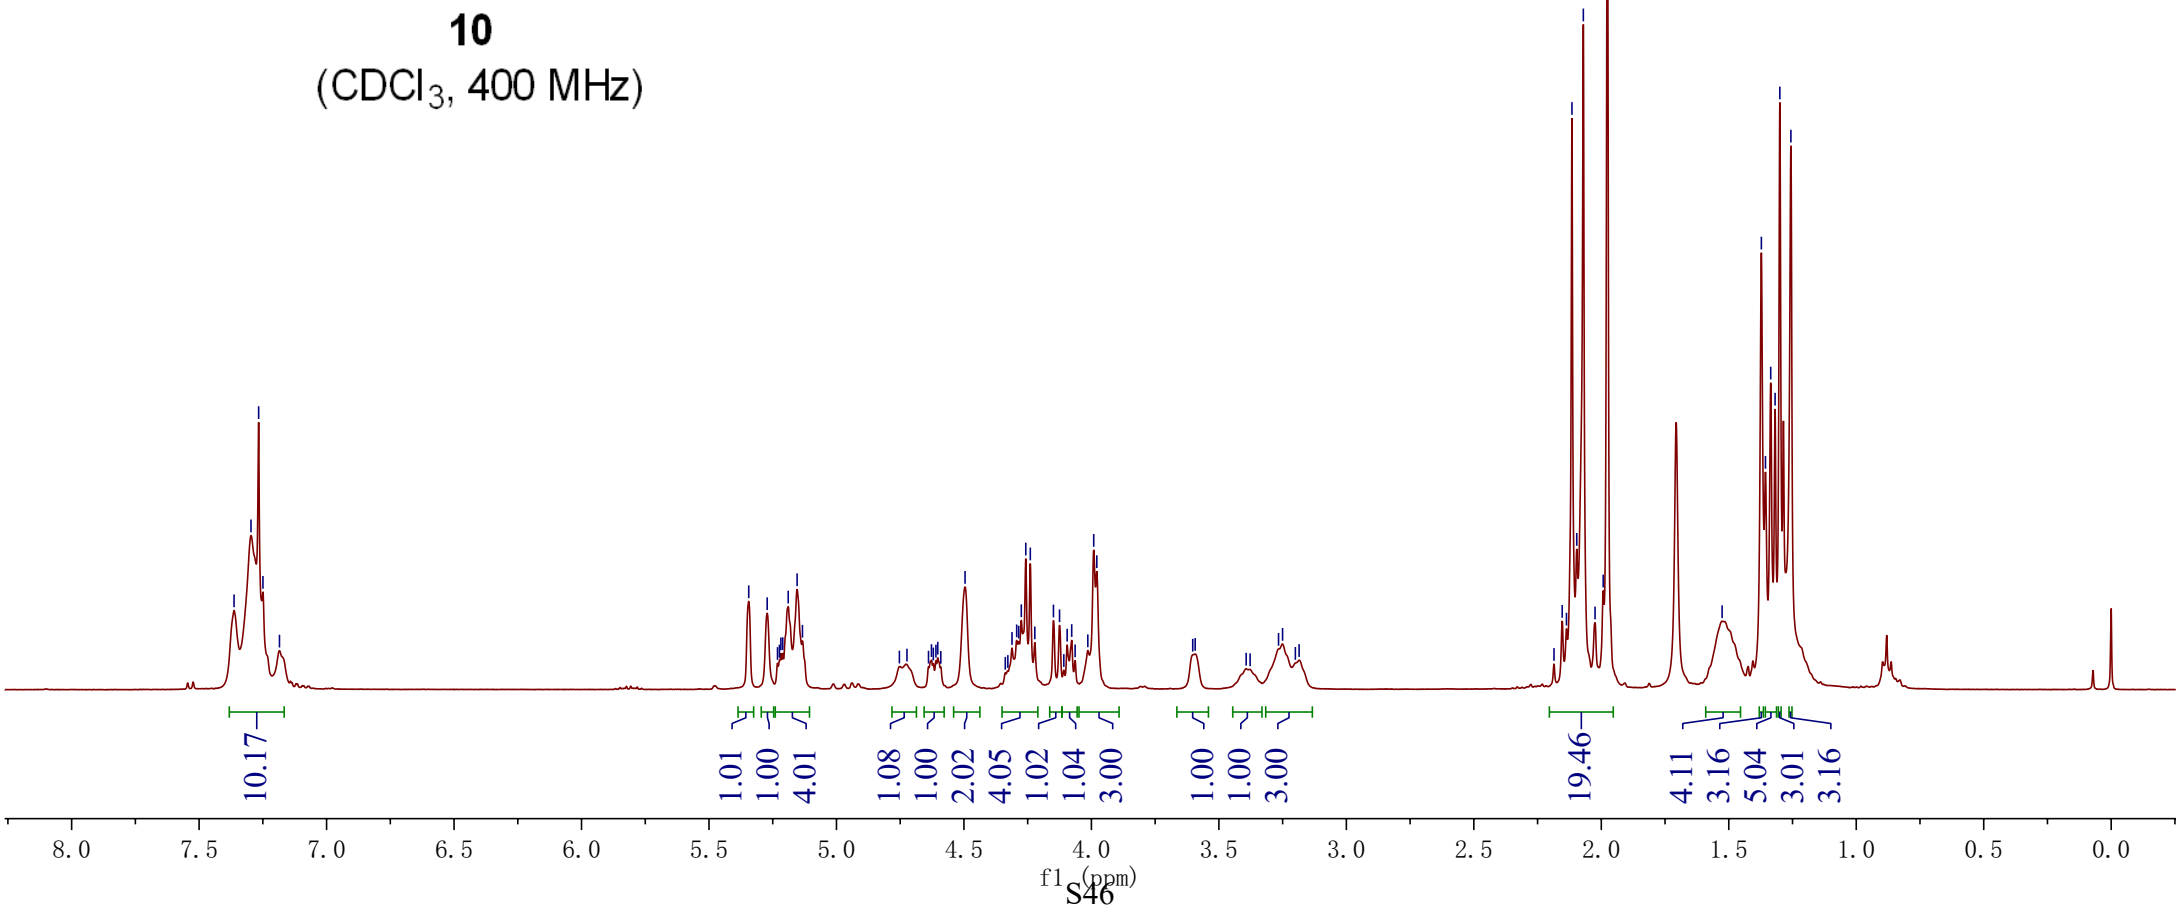

170.819  
170.594  
170.354  
169.988  
169.816  
167.827  
166.671  
138.132  
136.931  
128.677  
128.626  
128.578  
128.053  
127.988  
127.452  
127.383  
109.483  
98.728  
97.851  
77.412  
77.200  
76.989  
73.743  
71.668  
69.287  
68.079  
67.301  
67.218  
66.718  
66.628  
66.449  
64.531  
63.767  
63.703  
62.529  
61.969  
61.654  
50.676  
50.339  
47.217  
46.348  
34.295  
31.788  
31.596  
29.857  
29.823  
29.351  
27.001  
25.550  
23.544  
22.854  
21.062  
20.979  
20.906  
20.832  
20.790  
14.367  
14.001

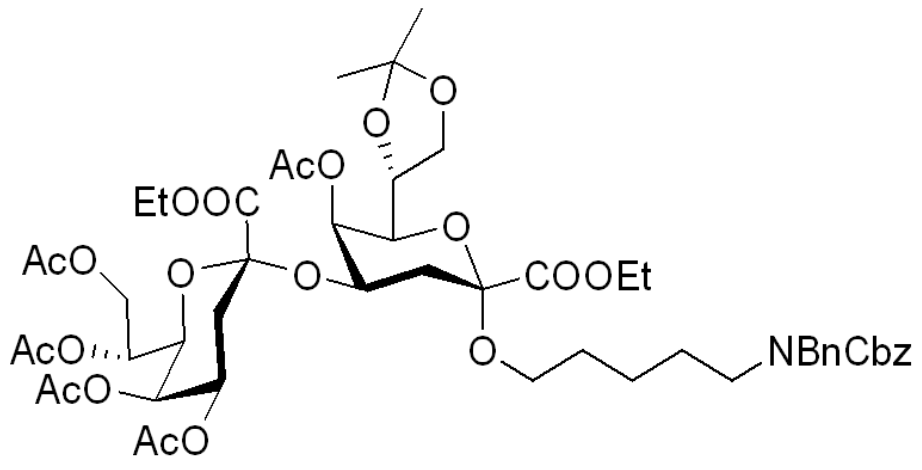

**10**

(CDCl<sub>3</sub>, 100 MHz)

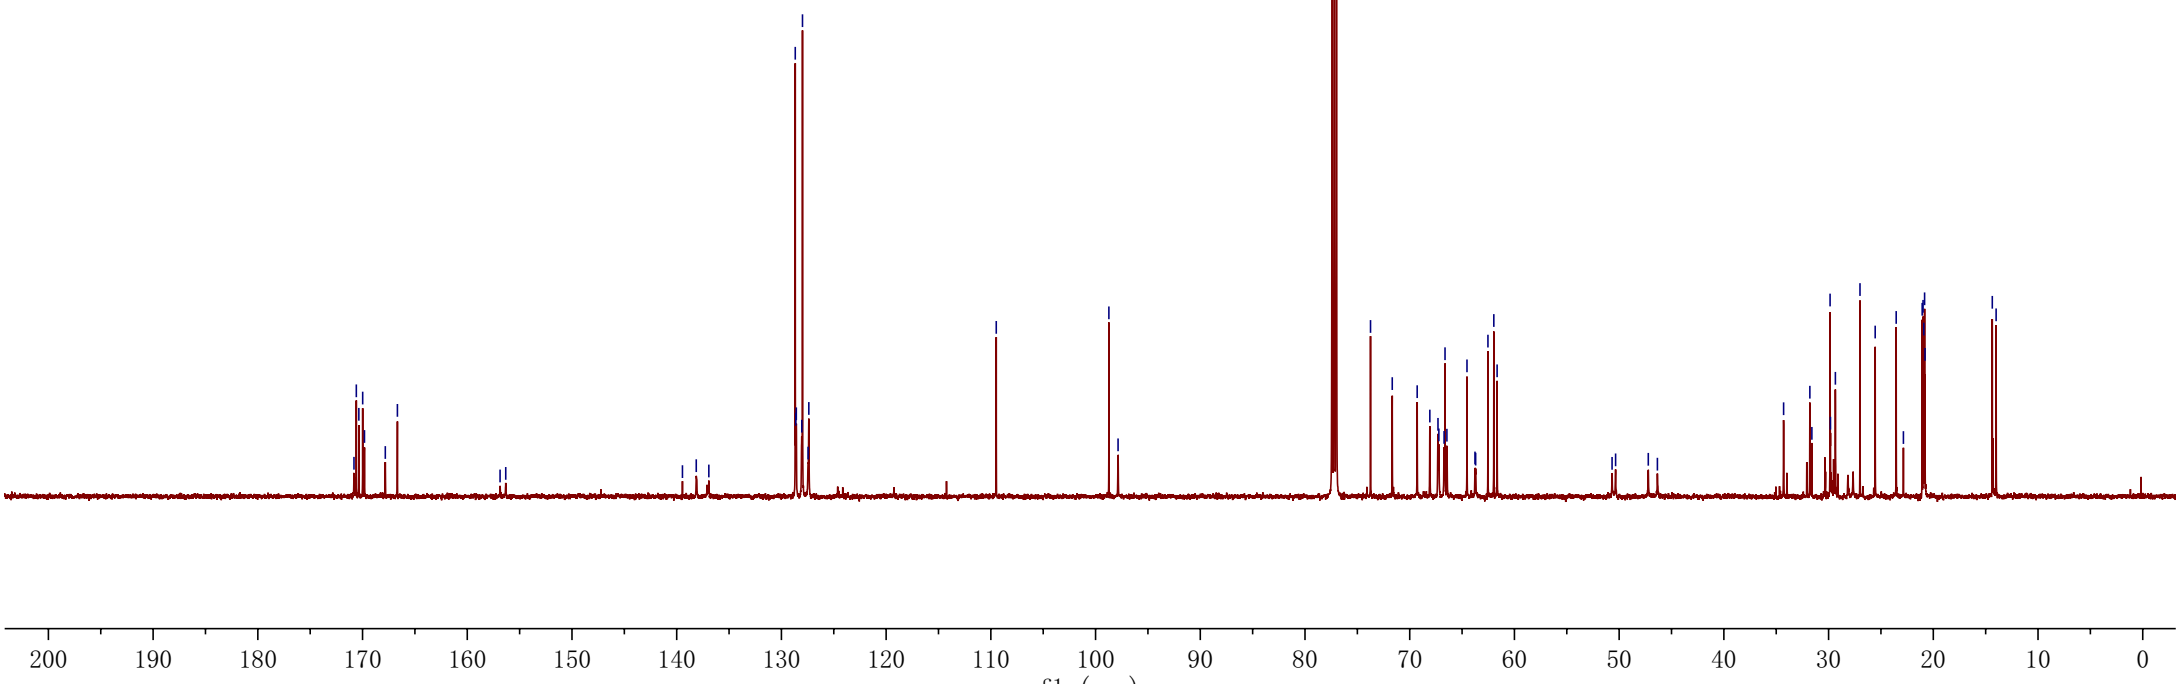

7.360  
7.294  
7.260  
7.249  
7.171  
7.157

5.184  
5.151  
4.497  
4.487  
4.479  
4.268  
4.250  
4.240  
4.222  
4.130

3.589  
3.552  
3.251  
3.184  
3.184  
2.774  
2.745  
2.736  
1.845  
1.807  
1.520  
1.502  
1.476  
1.410  
1.366  
1.306  
1.282  
1.264  
1.253

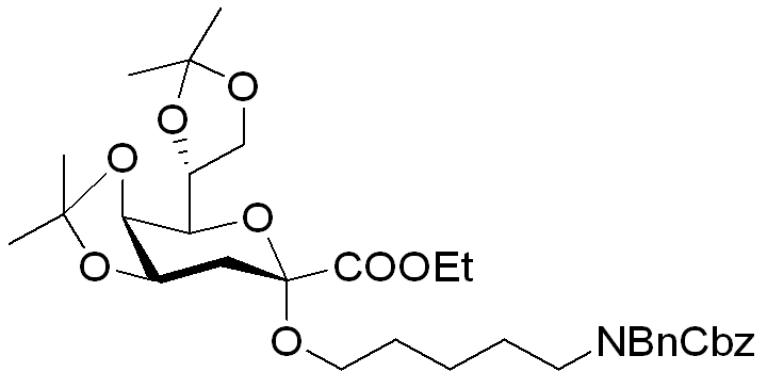

**S4**  
(CDCl<sub>3</sub>, 400 MHz)

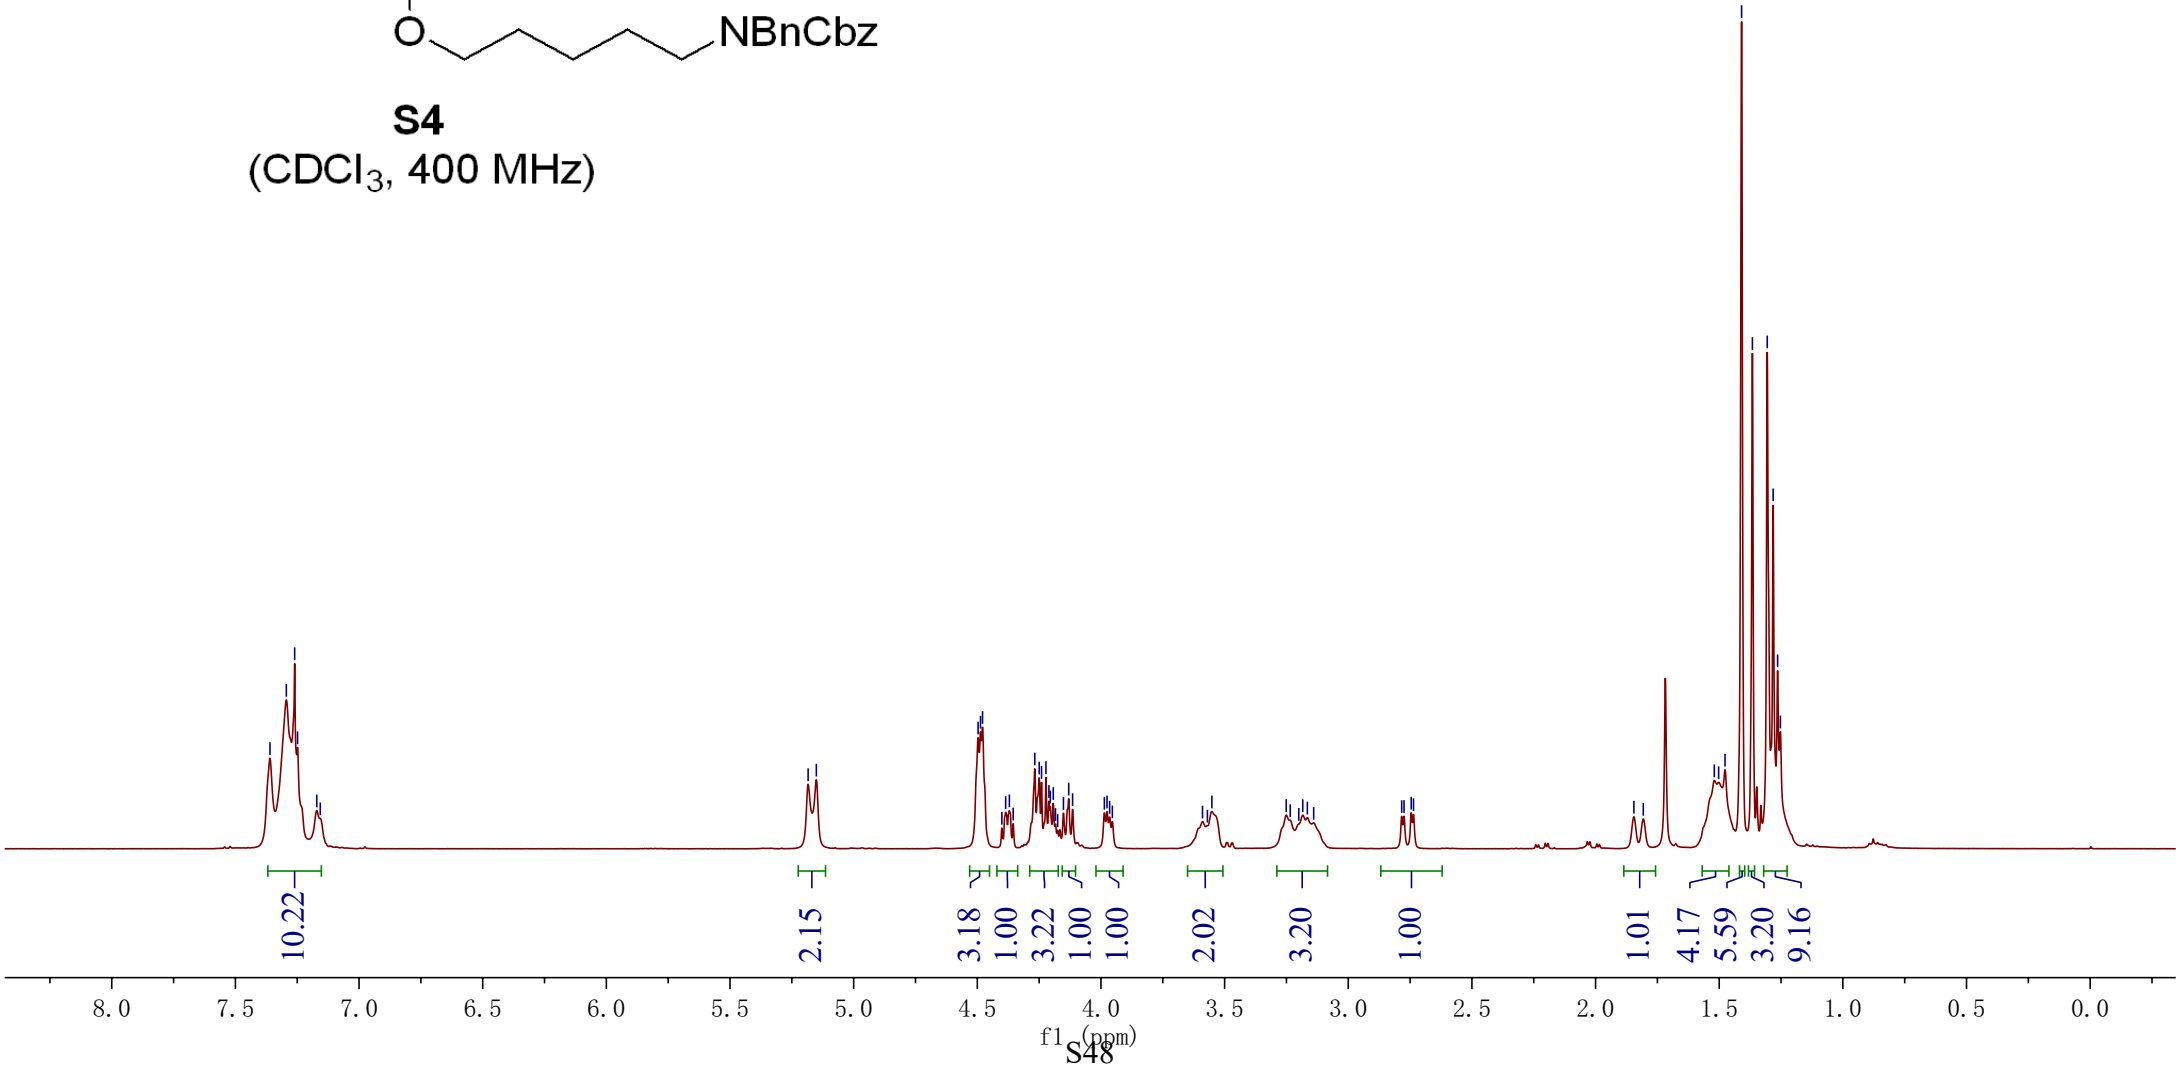



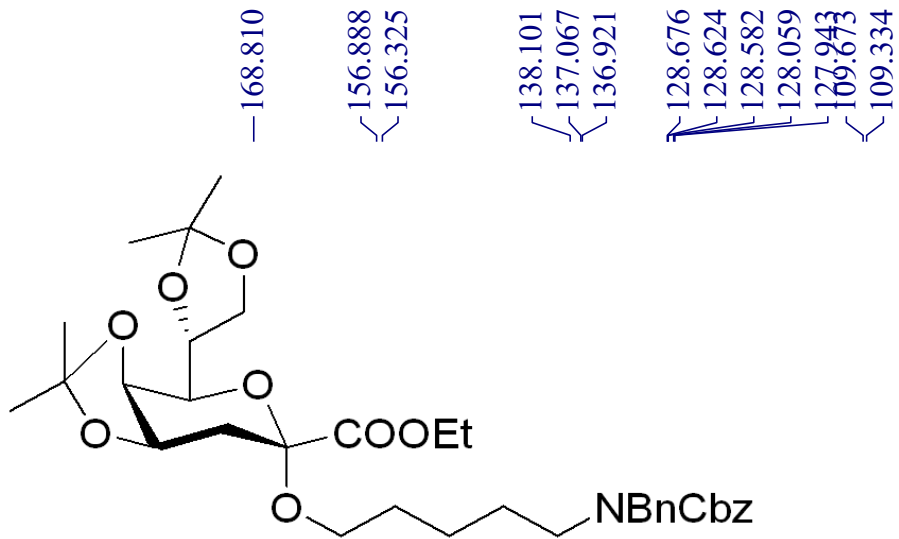

**S4**  
(CDCl<sub>3</sub>, 100 MHz)

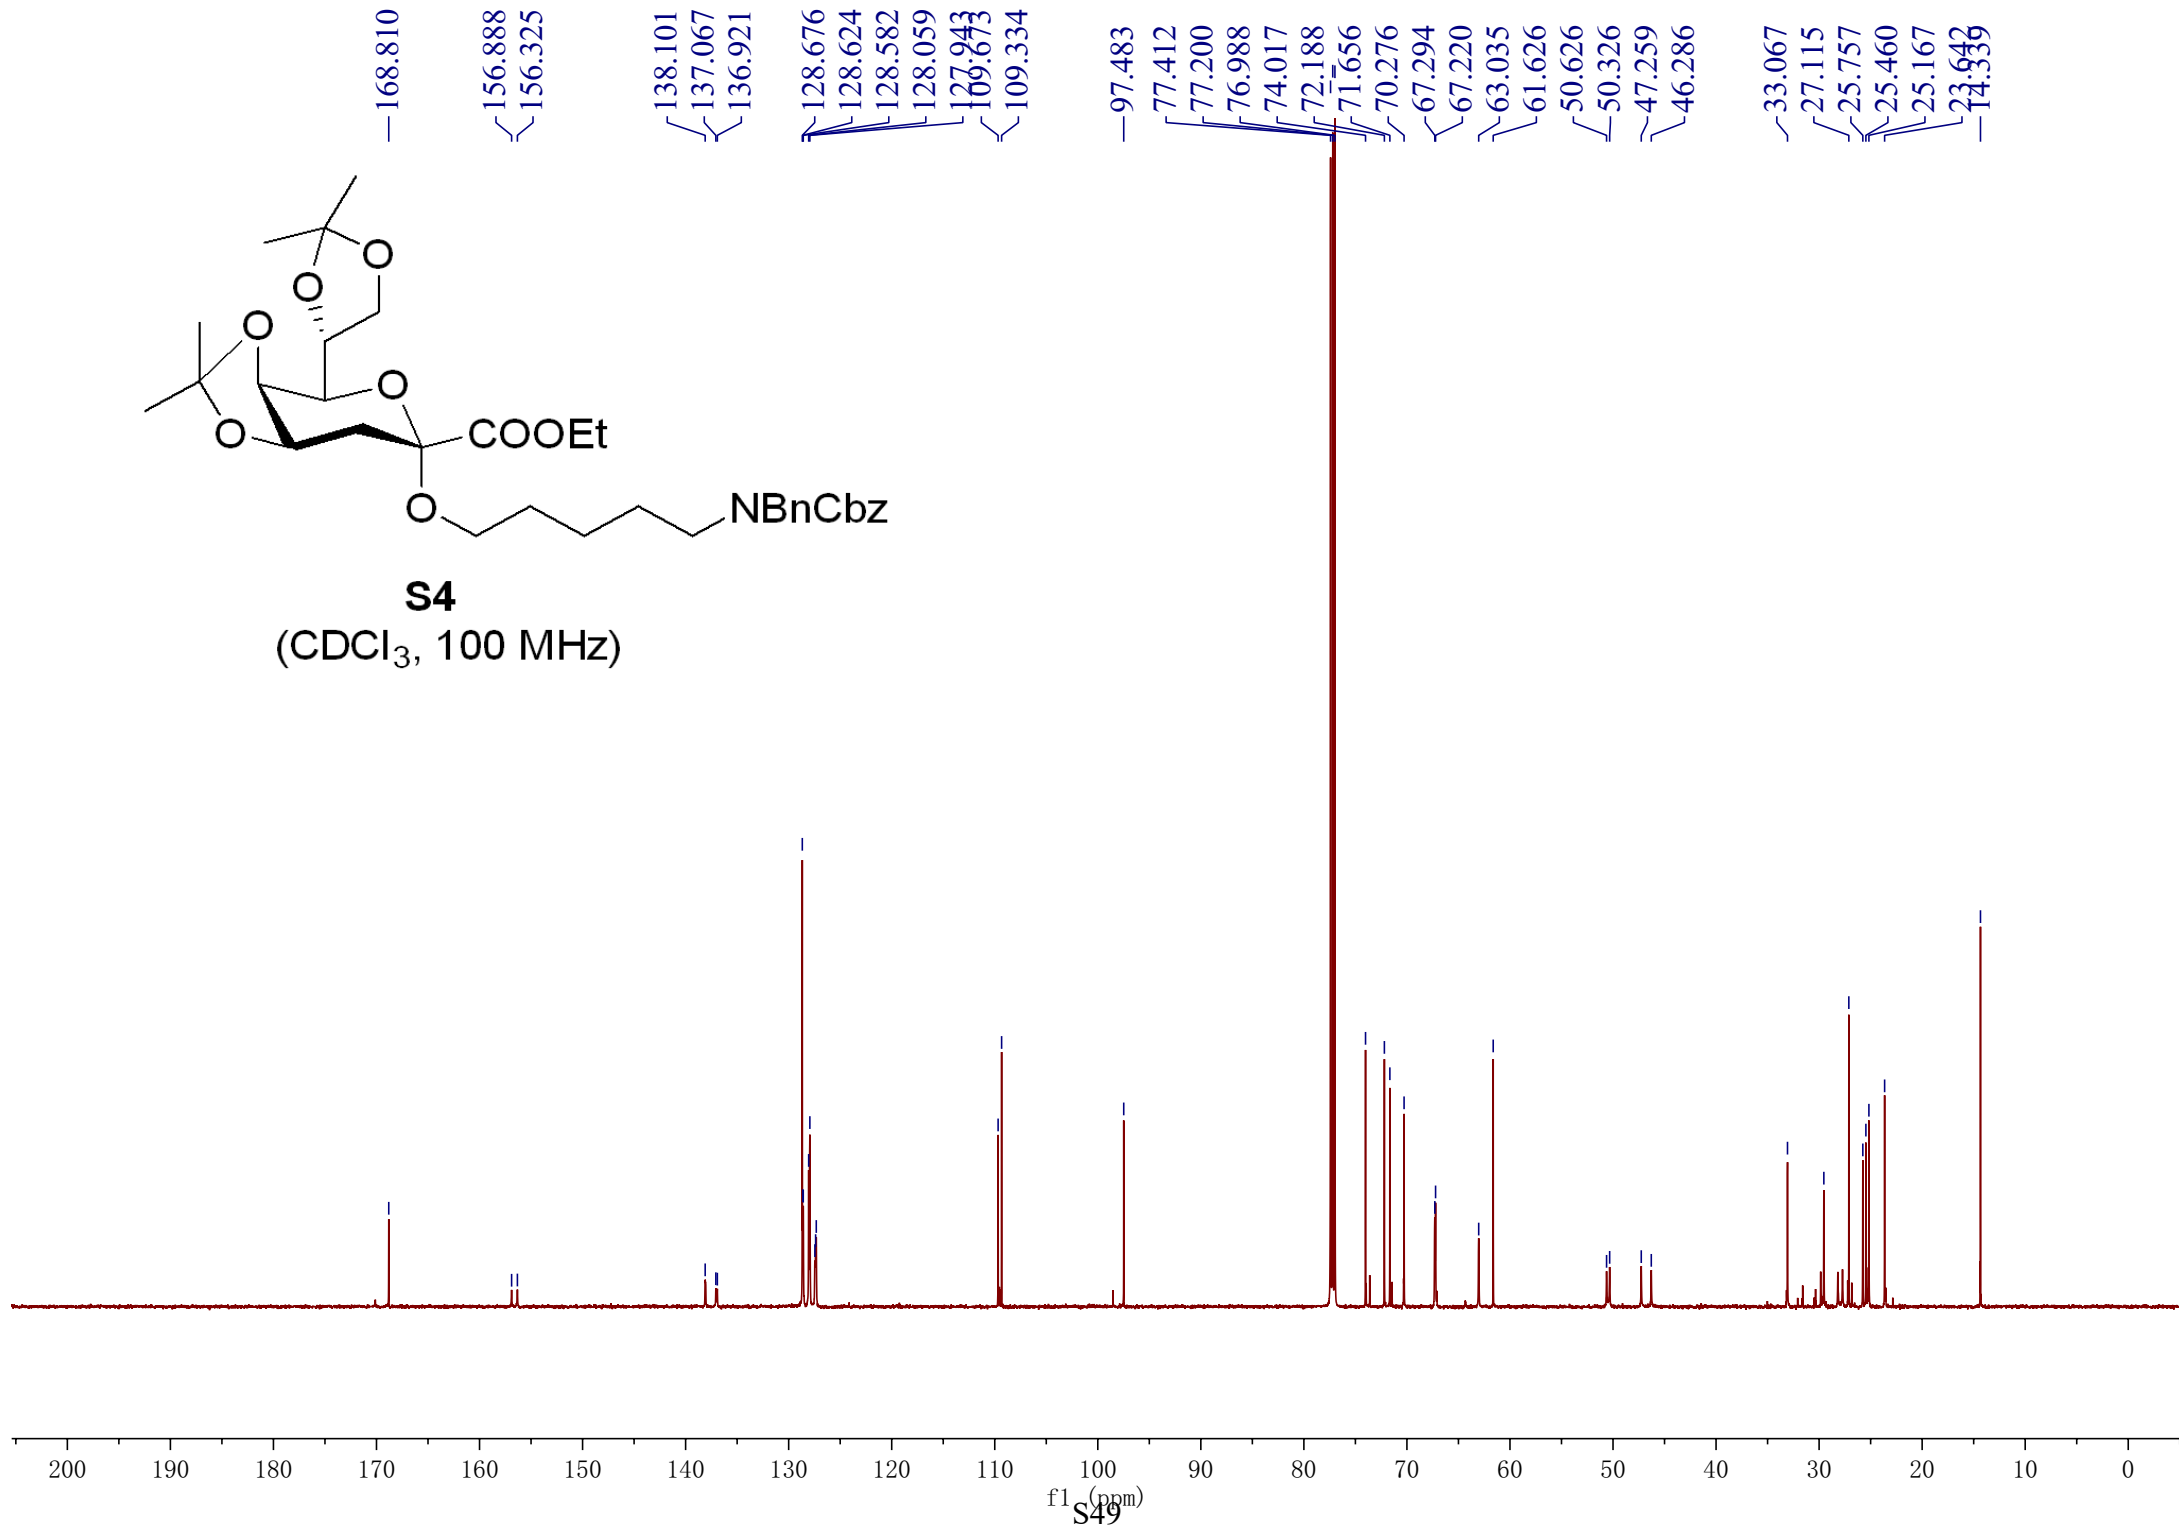

7.363  
7.300  
7.281  
7.270  
7.260  
7.253  
7.236  
7.164  
7.148  
5.186  
5.147  
4.544  
4.504  
4.488  
4.479  
4.470  
4.446  
4.405  
4.359  
4.342  
4.264  
4.246  
4.227  
4.209  
4.192  
4.183  
4.012  
3.849  
3.776  
3.758  
3.610  
3.593  
3.353  
3.176  
3.165  
3.157  
3.142  
2.649  
2.637  
2.611  
2.599  
1.910  
1.879  
1.873  
1.604  
1.586  
1.570  
1.554  
1.493  
1.481  
1.467  
1.429  
1.328  
1.311  
1.290  
1.280  
1.273  
1.249

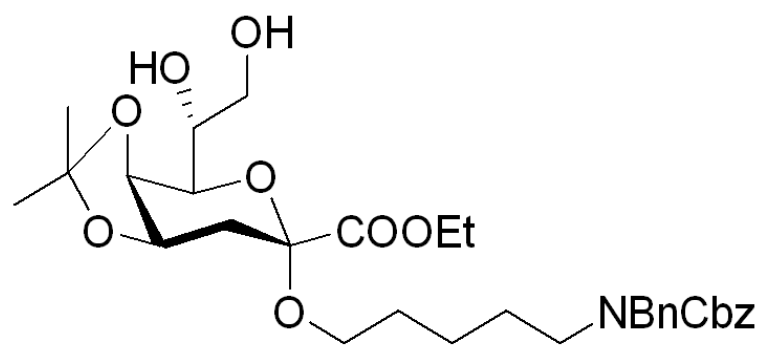

**11**  
(CDCl<sub>3</sub>, 400 MHz)

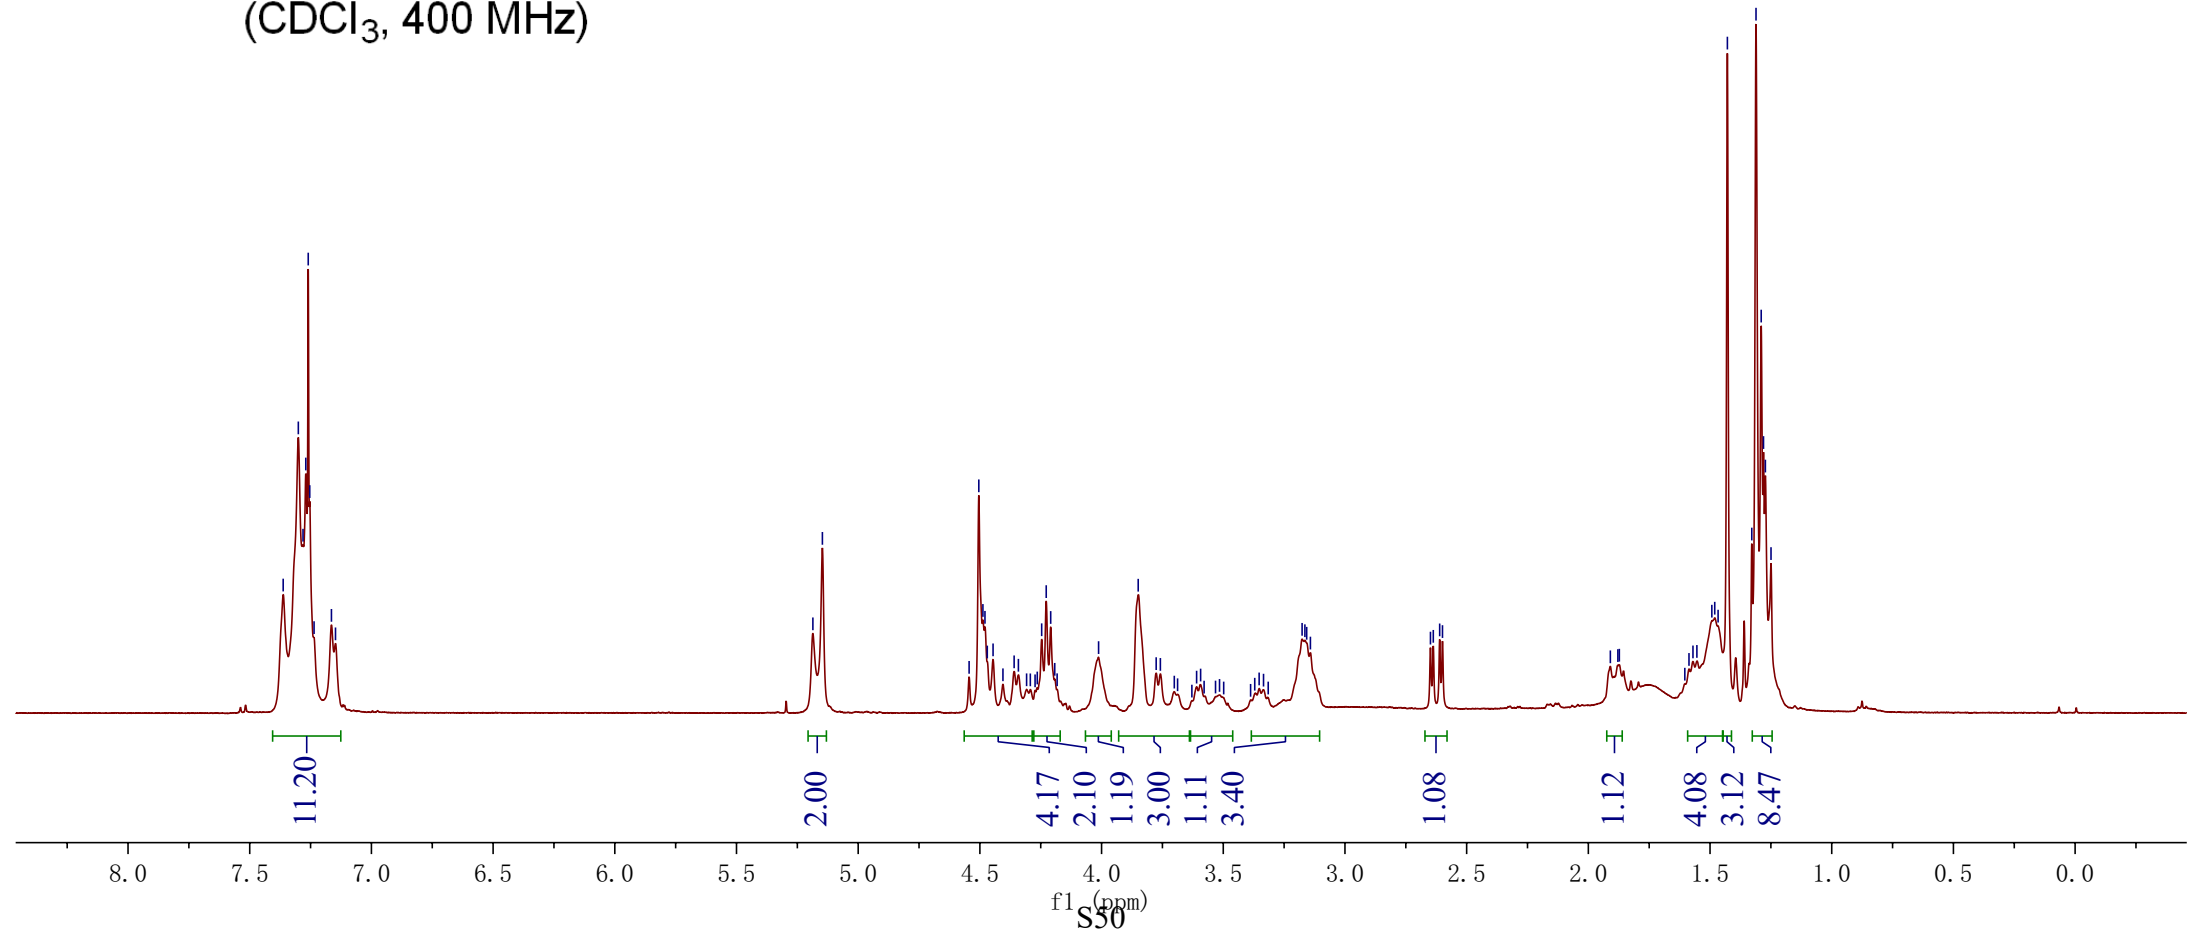

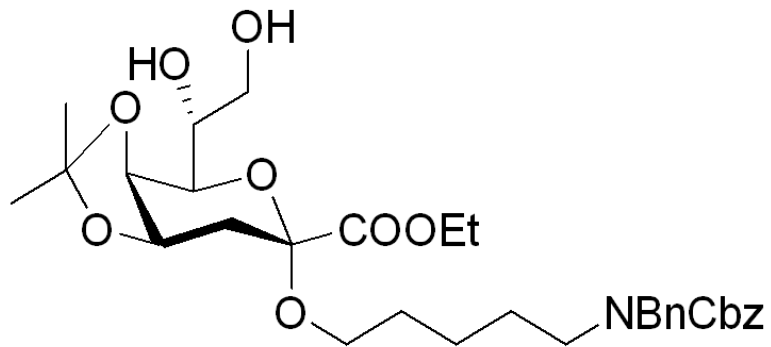

**11**

(CDCl<sub>3</sub>, 100 MHz)

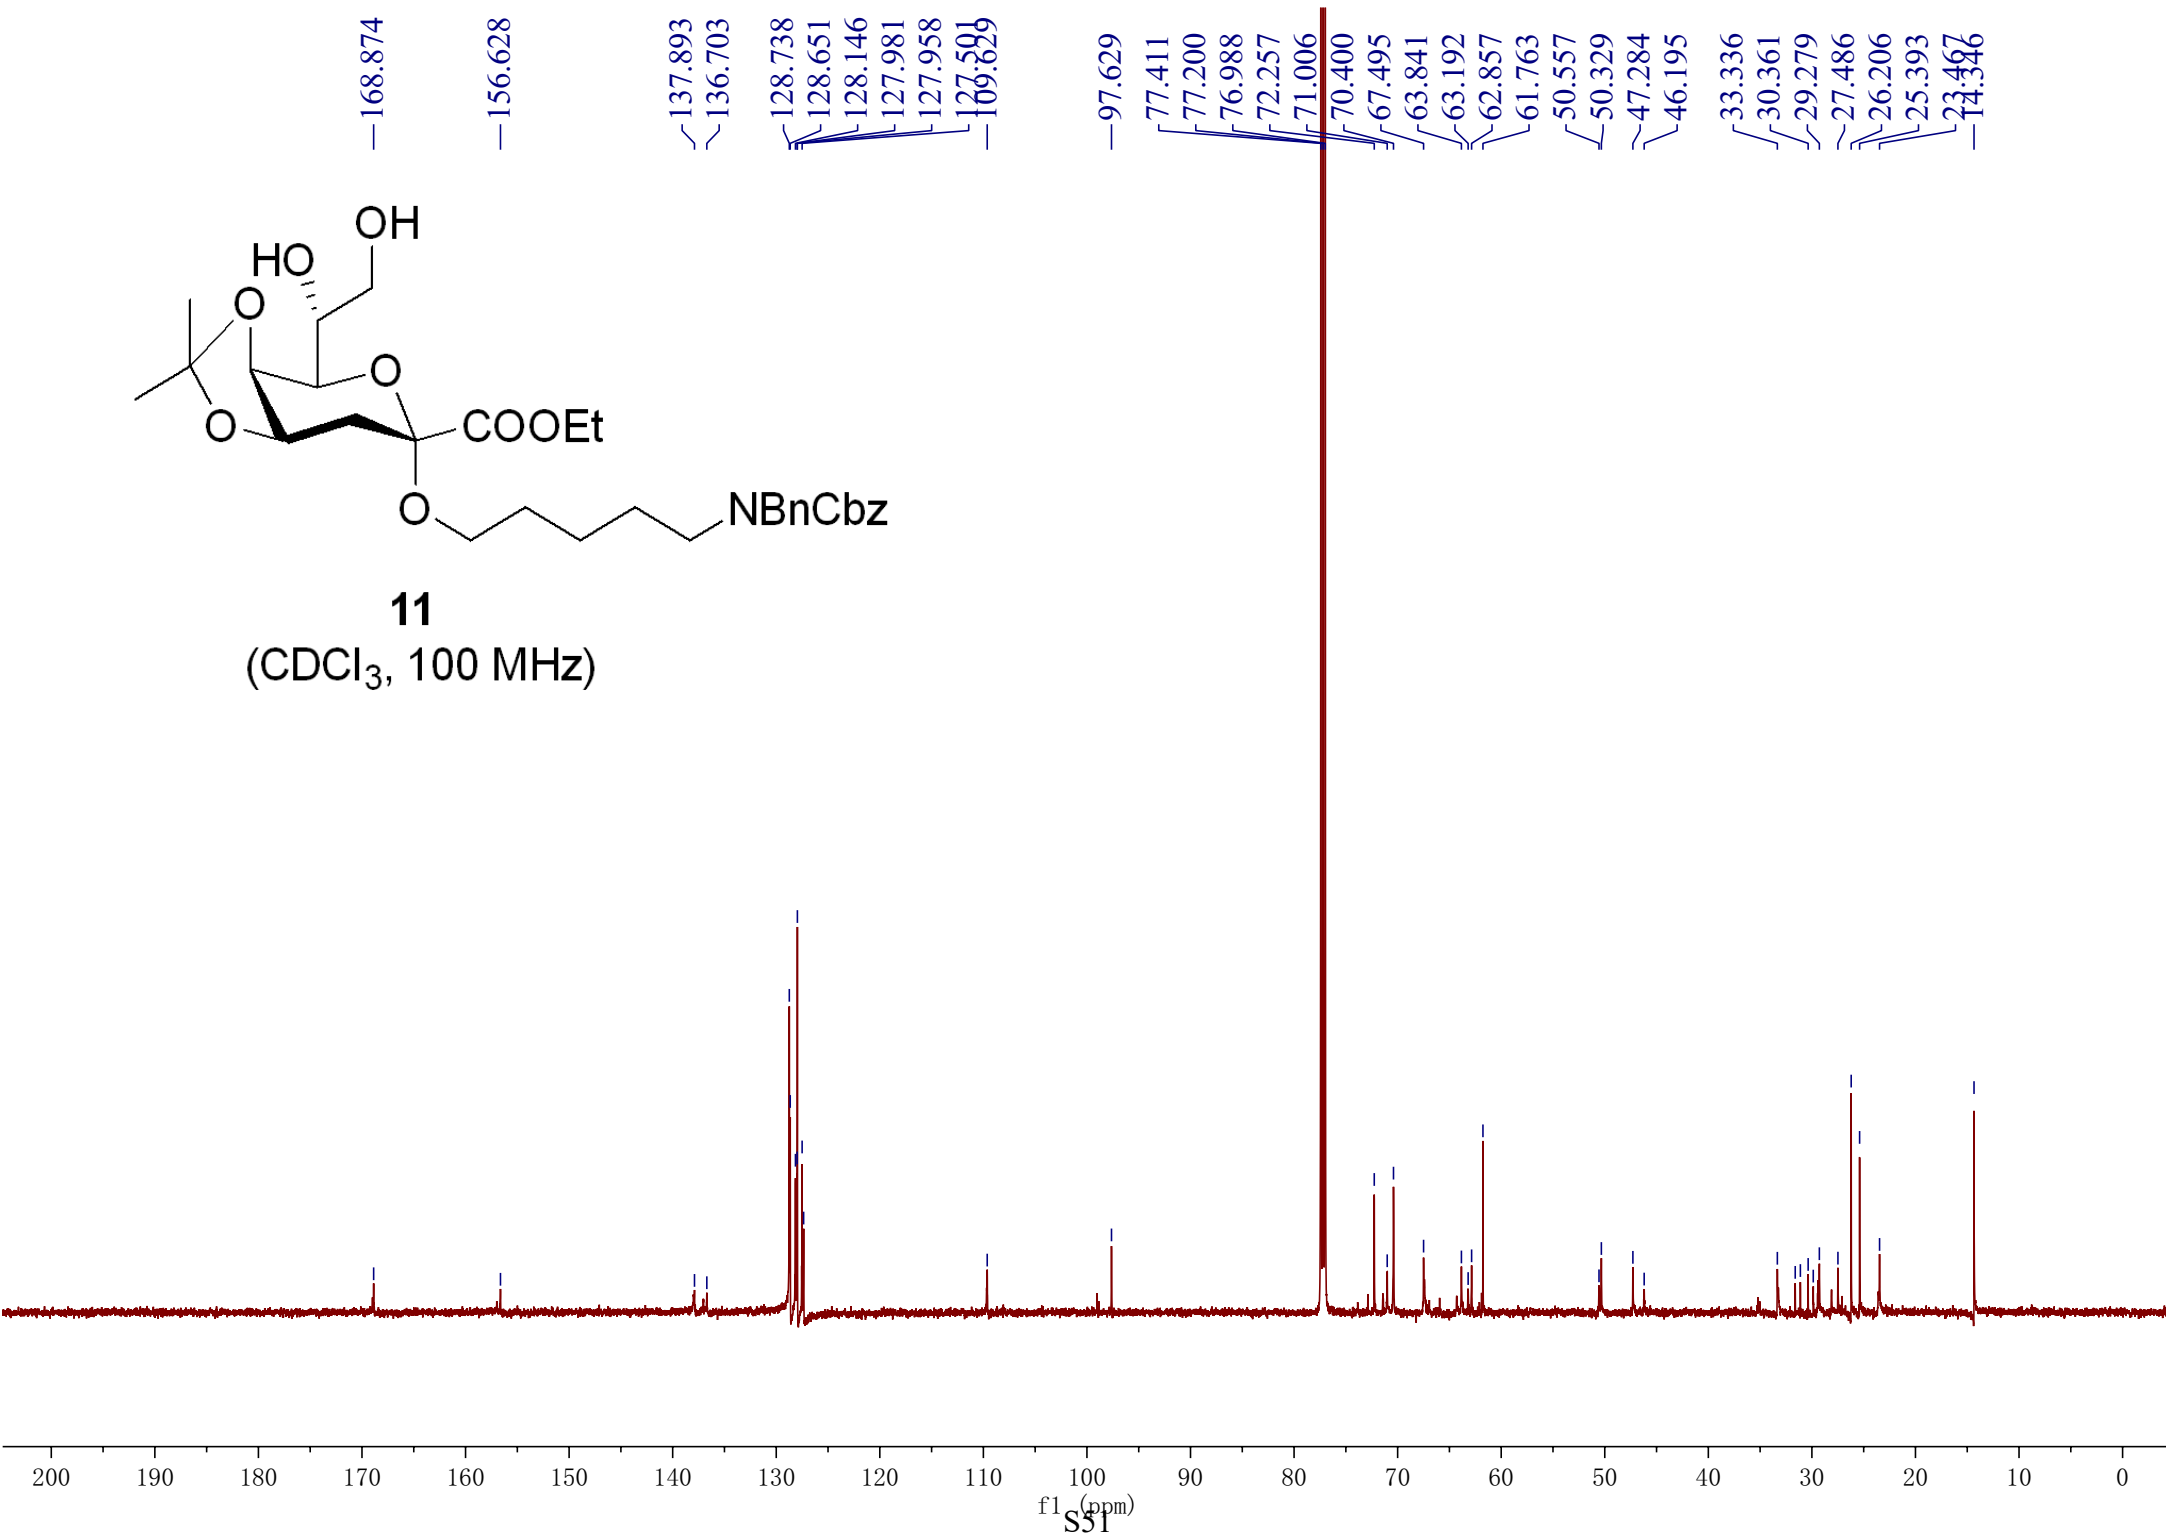

7.354  
7.285  
7.260  
7.238  
7.172  
7.156  
5.343  
5.289  
5.246  
5.225  
5.221  
5.179  
5.138  
4.499  
4.489  
4.482  
4.463  
4.358  
4.354  
4.340  
4.336  
4.274  
4.250  
4.231  
4.212  
4.193  
4.187  
4.176  
4.156  
4.145  
4.138  
4.120  
4.102  
4.085  
3.653  
3.587  
3.244  
3.185  
3.169  
2.154  
2.141  
2.084  
2.060  
2.037  
1.967  
1.945  
1.893  
1.853  
1.824  
1.516  
1.500  
1.324  
1.304  
1.281  
1.276  
1.267  
1.250  
1.232

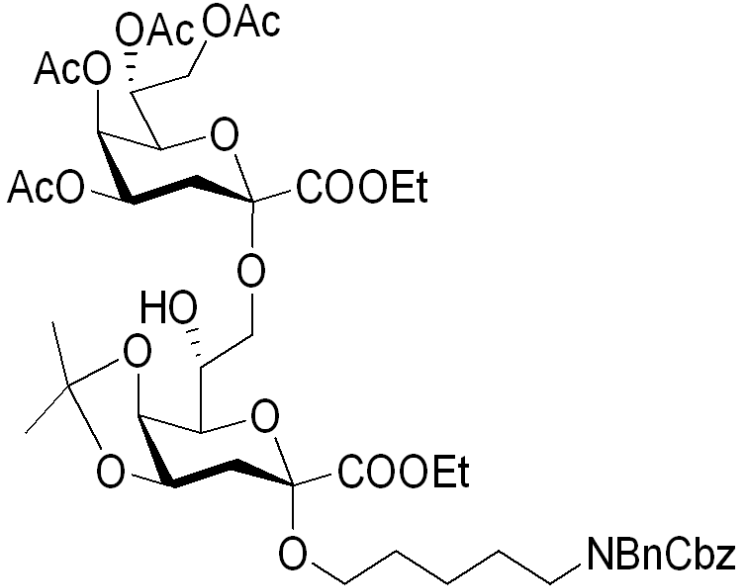

**12**

(CDCl<sub>3</sub>, 400 MHz)

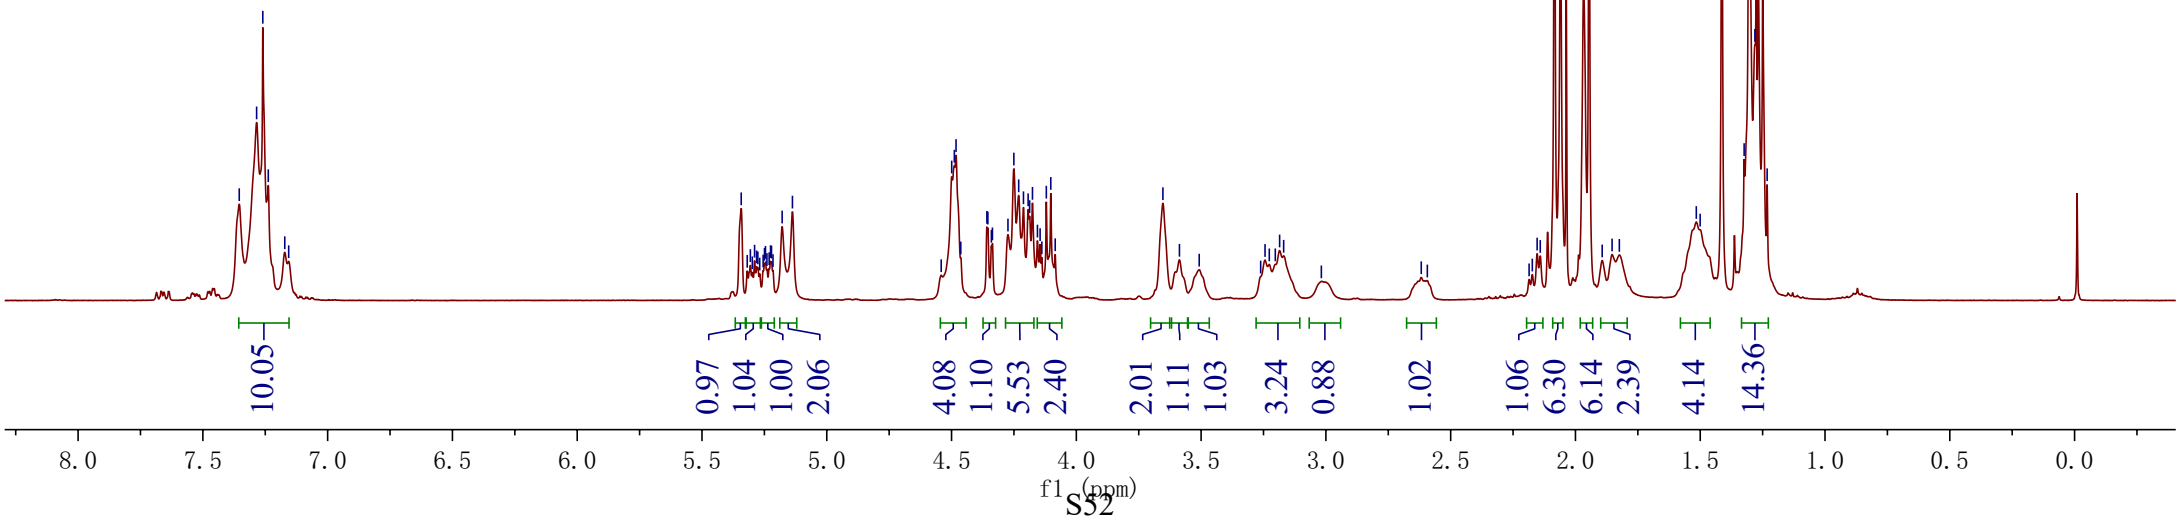

170.796  
170.603  
169.985  
169.895  
168.645  
167.524  
156.874  
156.299

138.147  
132.283  
132.217  
132.115  
128.662  
128.621  
128.568  
128.034  
127.932  
127.424  
127.339  
109.678

98.997  
97.771

77.412  
77.200  
76.988  
72.014  
70.045  
68.575  
66.503  
65.930  
63.319  
62.394  
61.588  
50.513  
50.250  
47.264  
46.273

33.260  
32.032  
29.442  
27.643  
26.214  
25.430  
23.651  
20.995  
20.898  
20.831  
14.332  
14.222

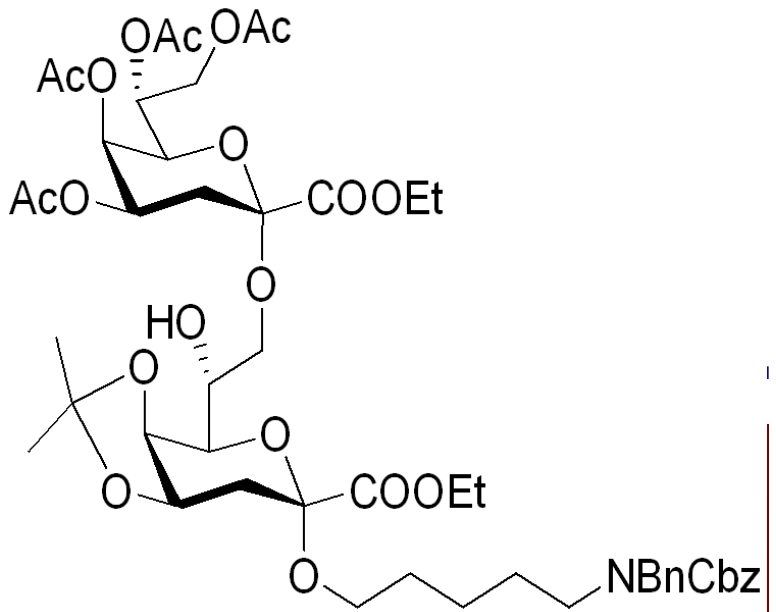

**12**  
(CDCl<sub>3</sub>, 100 MHz)

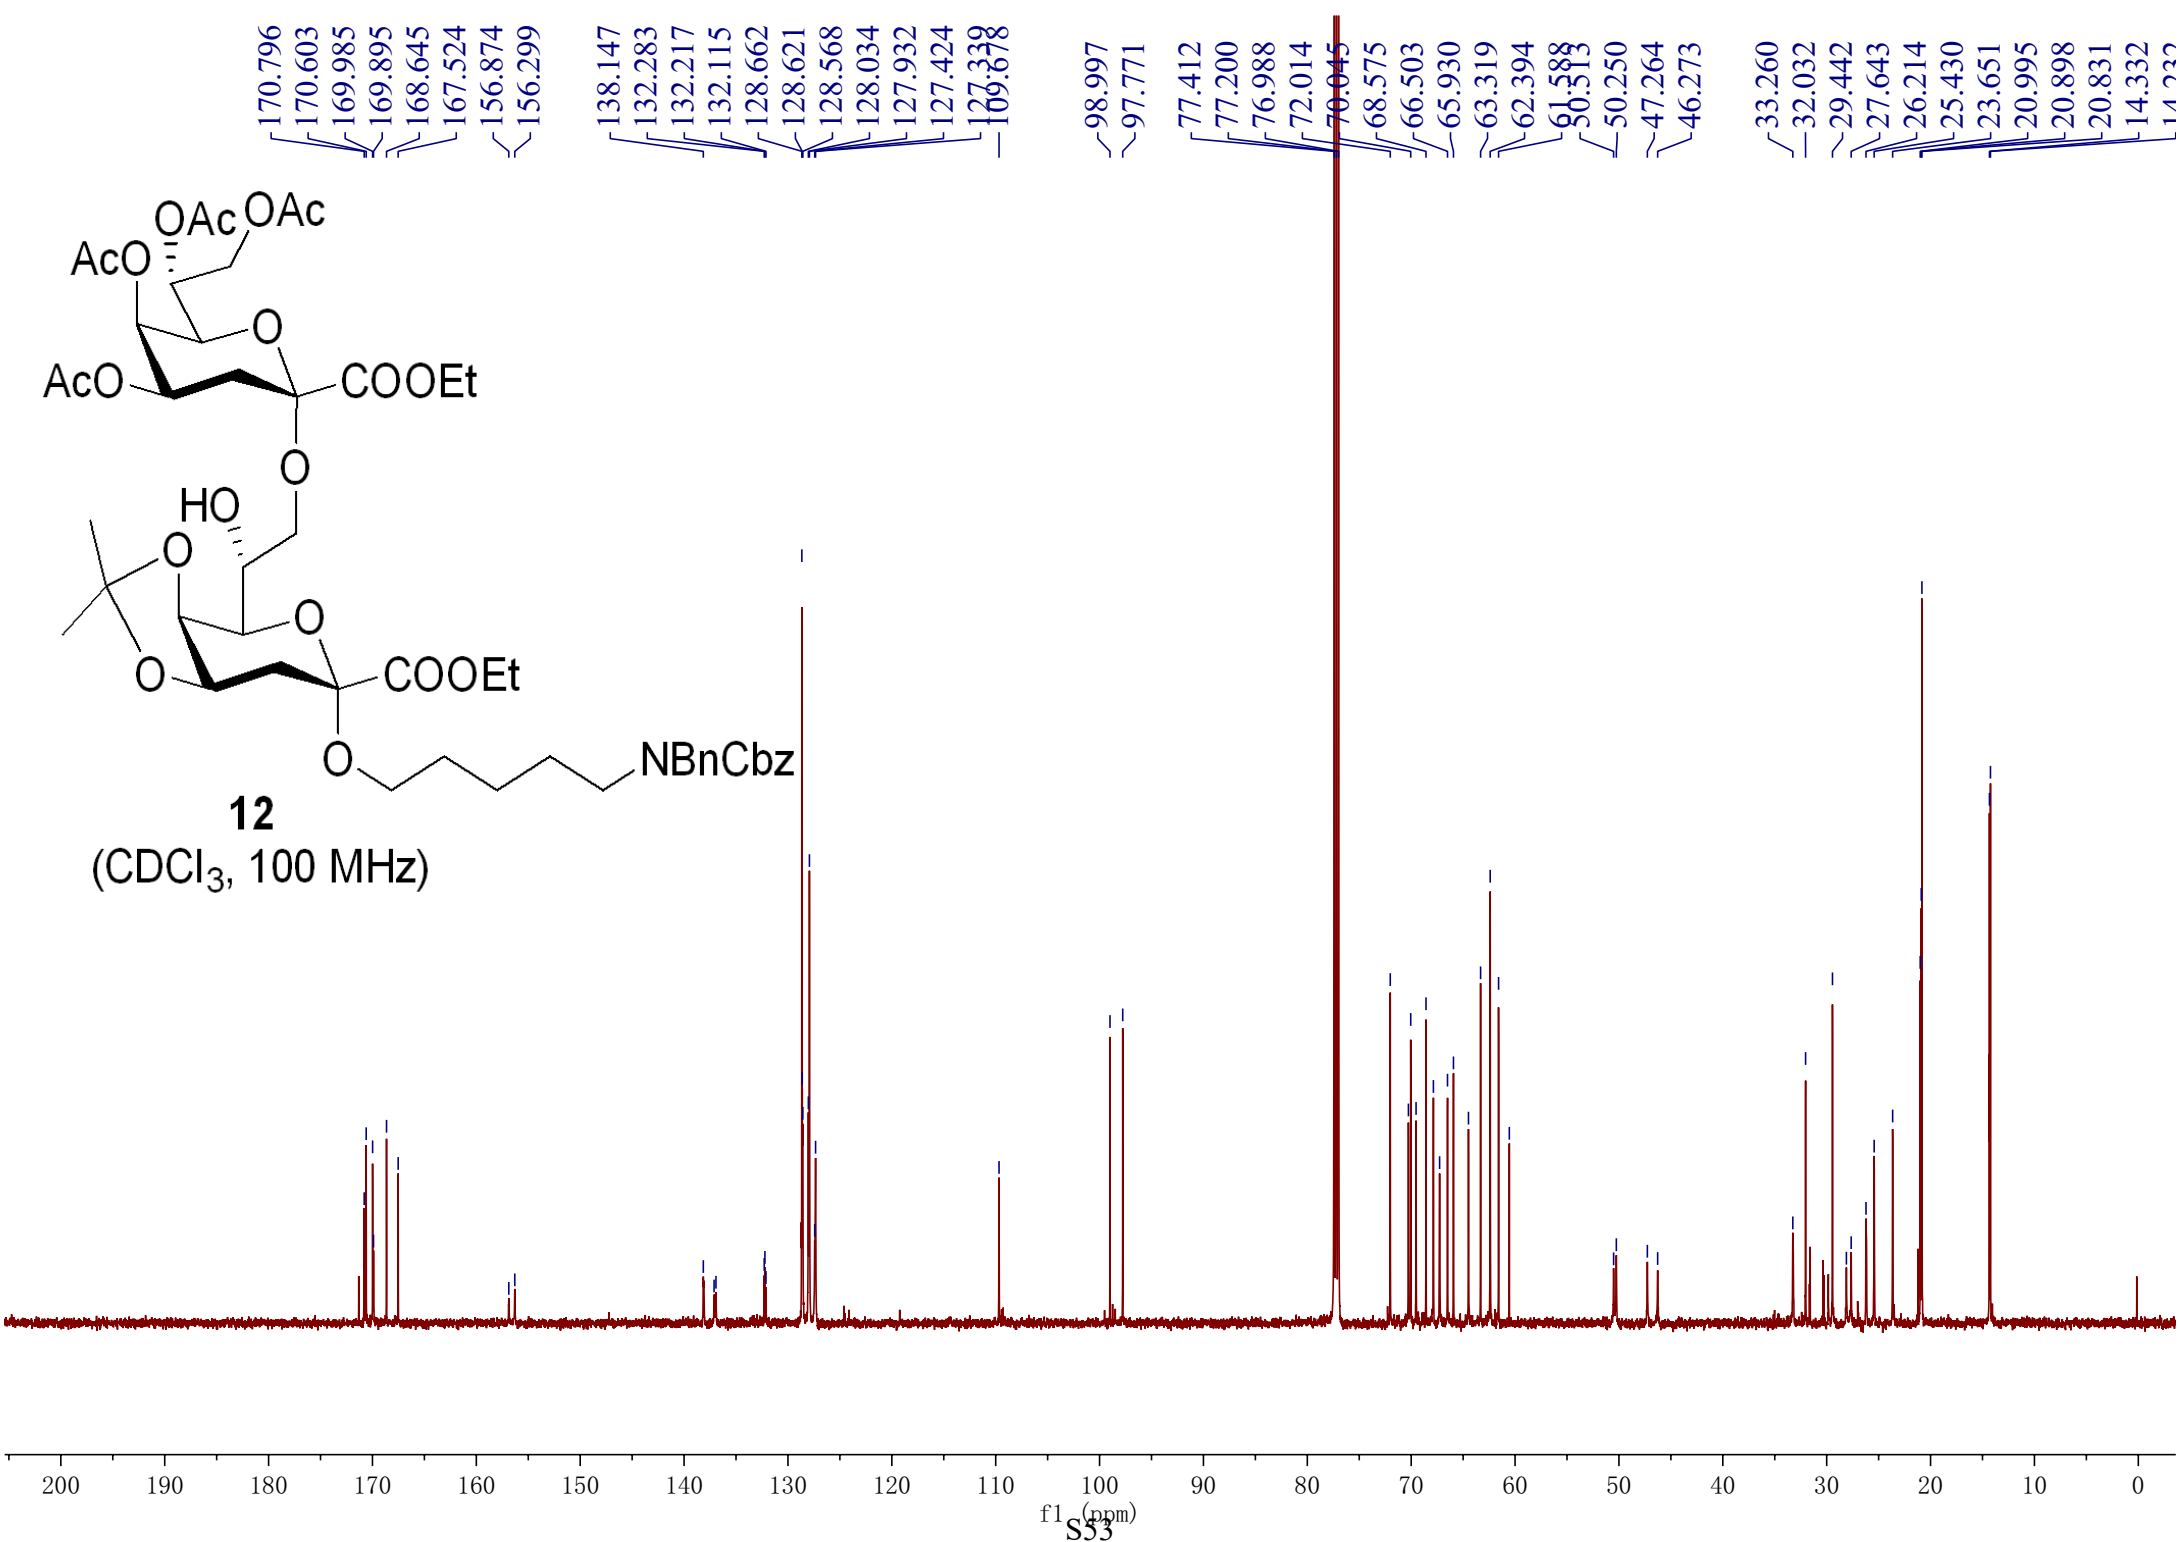

7.363  
7.298  
7.266  
7.250  
7.177  
5.335  
5.300  
5.274  
5.268  
5.261  
5.249  
5.243  
5.237  
5.231  
5.211  
5.206  
5.198  
5.189  
5.150  
4.494  
4.450  
4.436  
4.255  
4.241  
4.224  
4.203  
4.184  
4.173  
4.159  
4.147  
4.130  
4.115  
4.094  
4.013  
3.986  
3.865  
3.855  
3.249  
3.231  
3.189  
2.186  
2.174  
2.115  
2.084  
2.057  
2.045  
2.027  
1.973  
1.948  
1.512  
1.384  
1.339  
1.321  
1.303  
1.285  
1.281  
1.263  
1.246

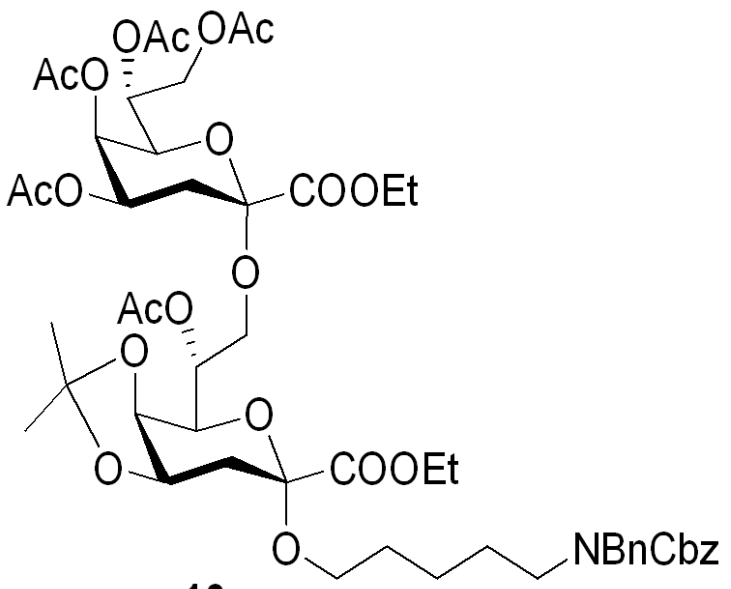

**13**  
(CDCl<sub>3</sub>, 400 MHz)

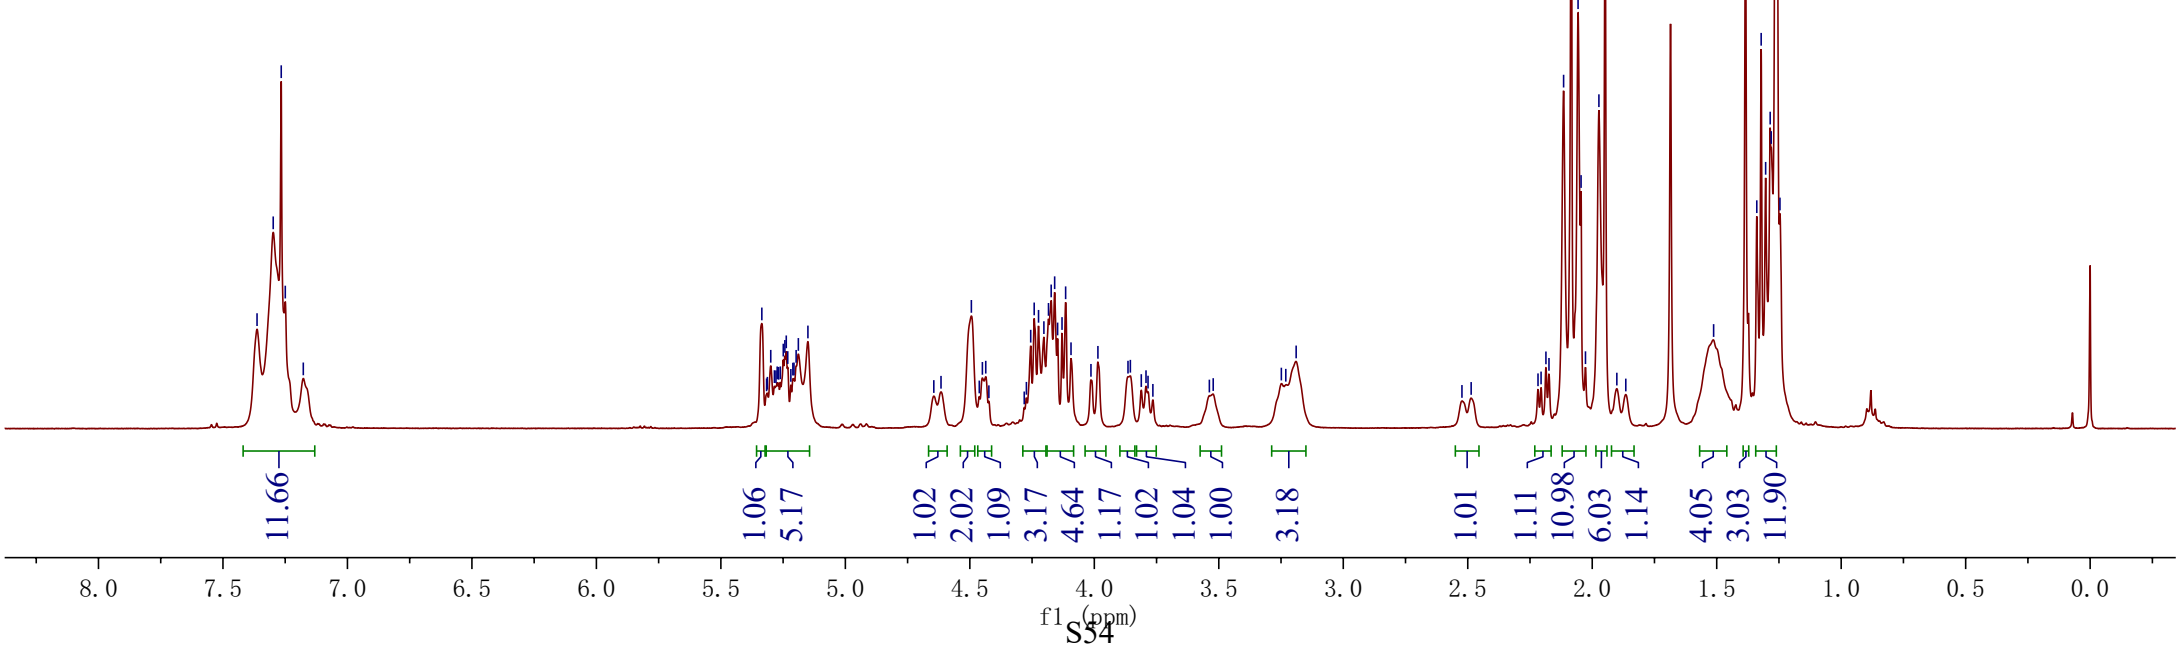

170.643  
170.570  
170.082  
170.027  
169.867  
168.345  
167.104  
156.867  
156.297

138.125  
137.102

128.689  
128.632  
128.590  
128.071  
127.969  
127.944  
109.686

98.969  
97.939

77.412  
77.200  
76.989  
71.869  
69.865  
68.749  
67.984  
66.585  
62.118  
61.620  
50.566  
50.288  
47.250  
46.281

33.395  
31.903  
29.860  
29.459  
26.319  
25.458  
23.691  
21.165  
20.917  
20.898  
20.831  
14.286  
14.222

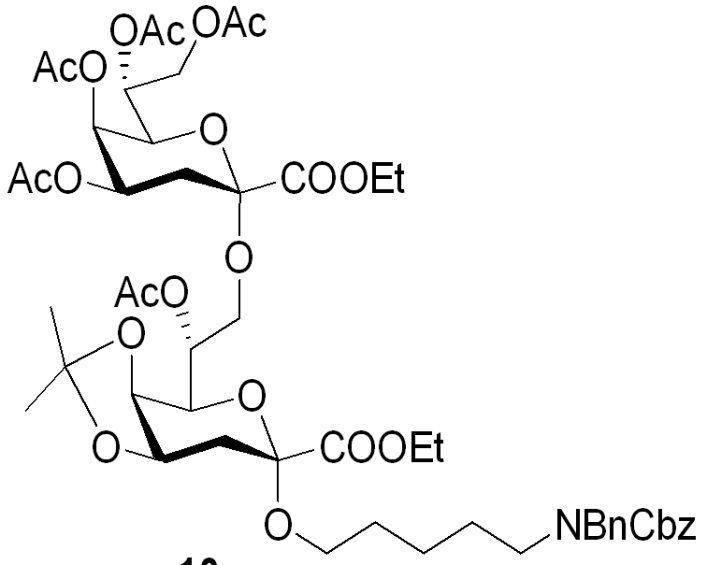

**13**

(CDCl<sub>3</sub>, 100 MHz)

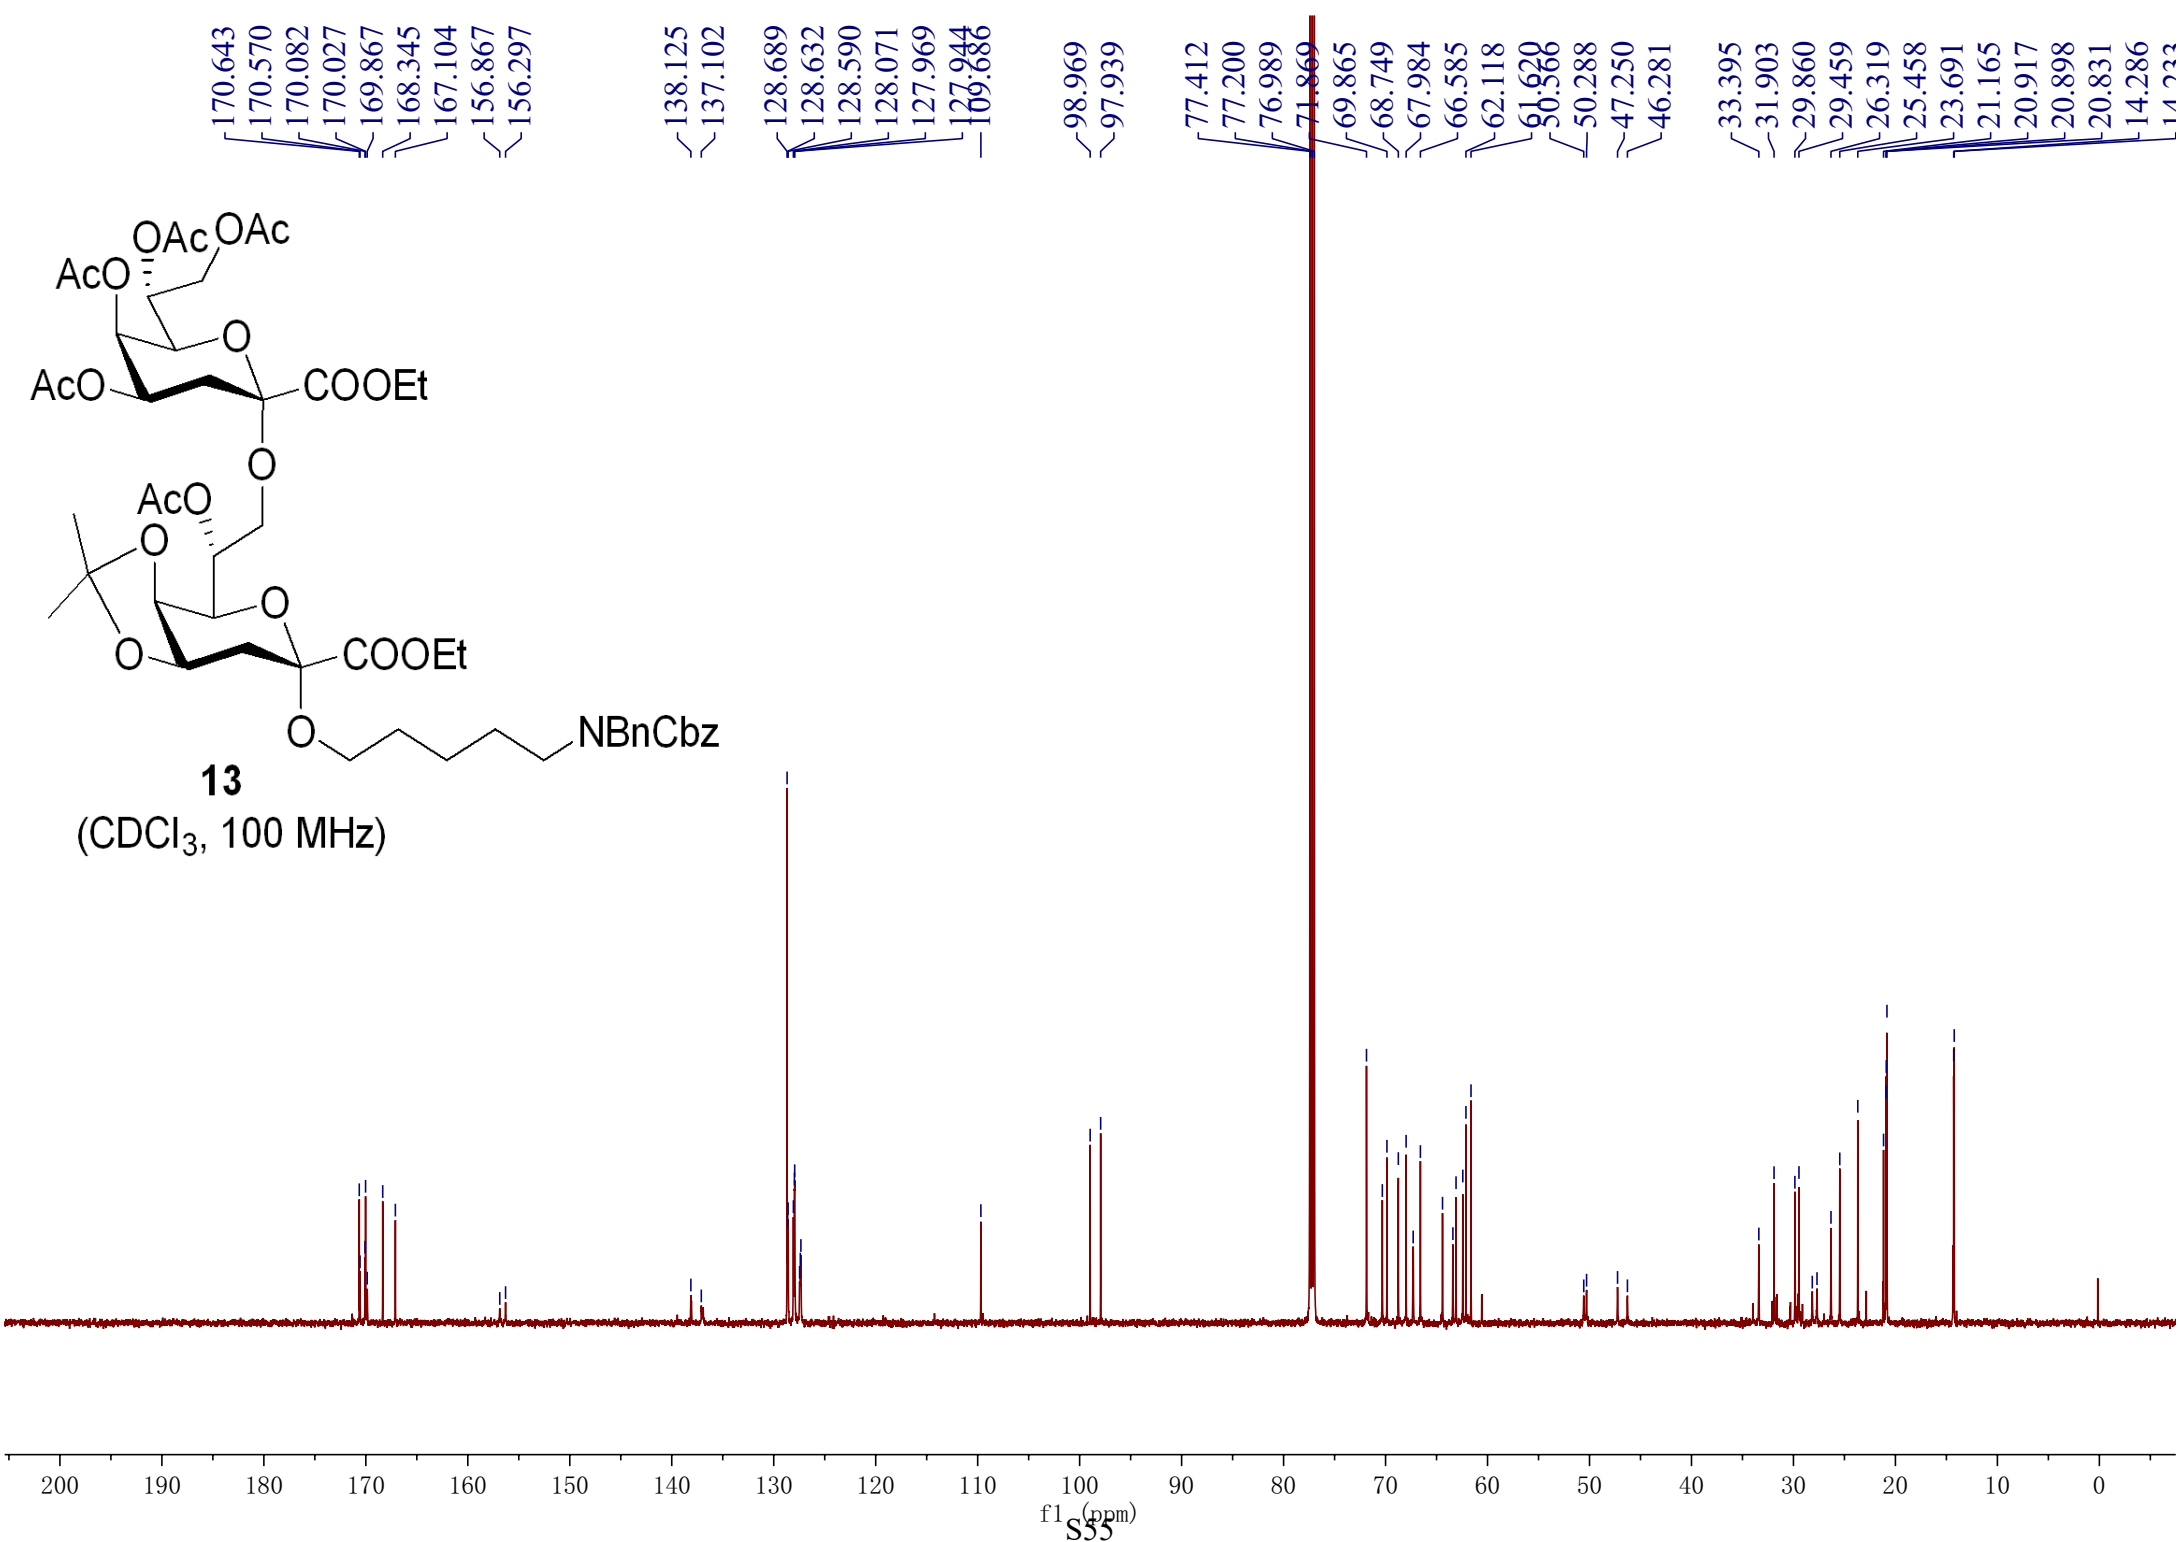

7.360  
7.339  
7.323  
7.302  
7.280  
7.260  
7.179  
7.161

5.193  
5.156  
4.607  
4.598  
4.507  
4.487  
4.475  
4.460  
4.454  
4.175  
4.159  
4.153  
4.137  
3.988  
3.976  
3.755  
3.256

2.265  
2.205  
2.194  
2.001  
1.971  
1.949  
1.529  
1.406  
1.377  
1.284  
1.254

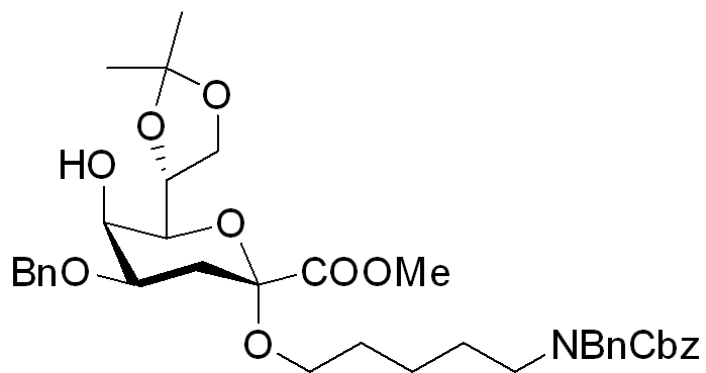

**14**  
(CDCl<sub>3</sub>, 400 MHz)

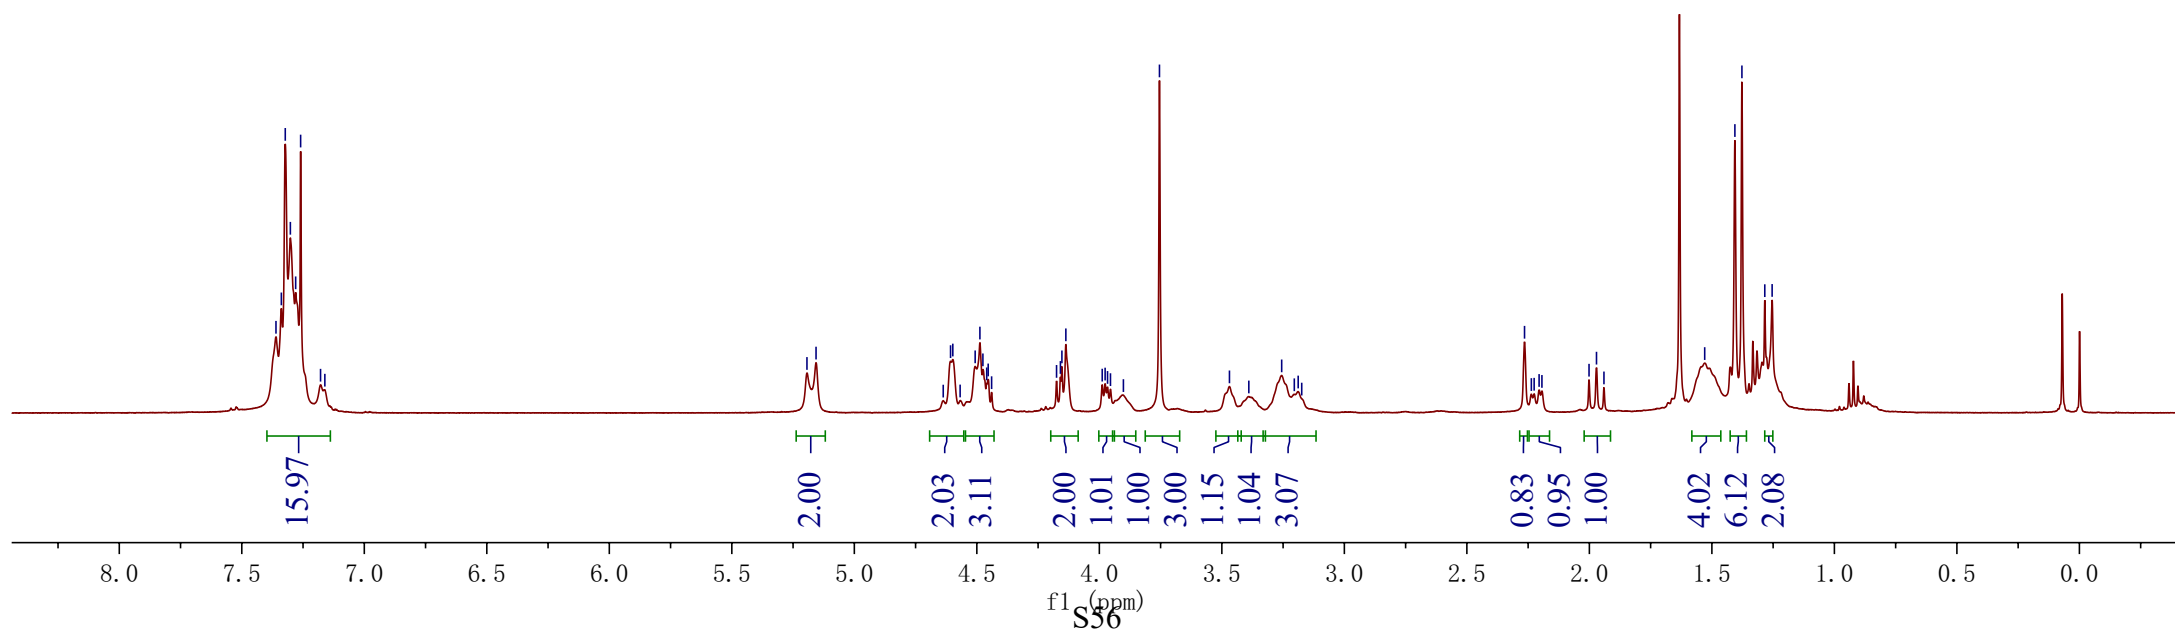



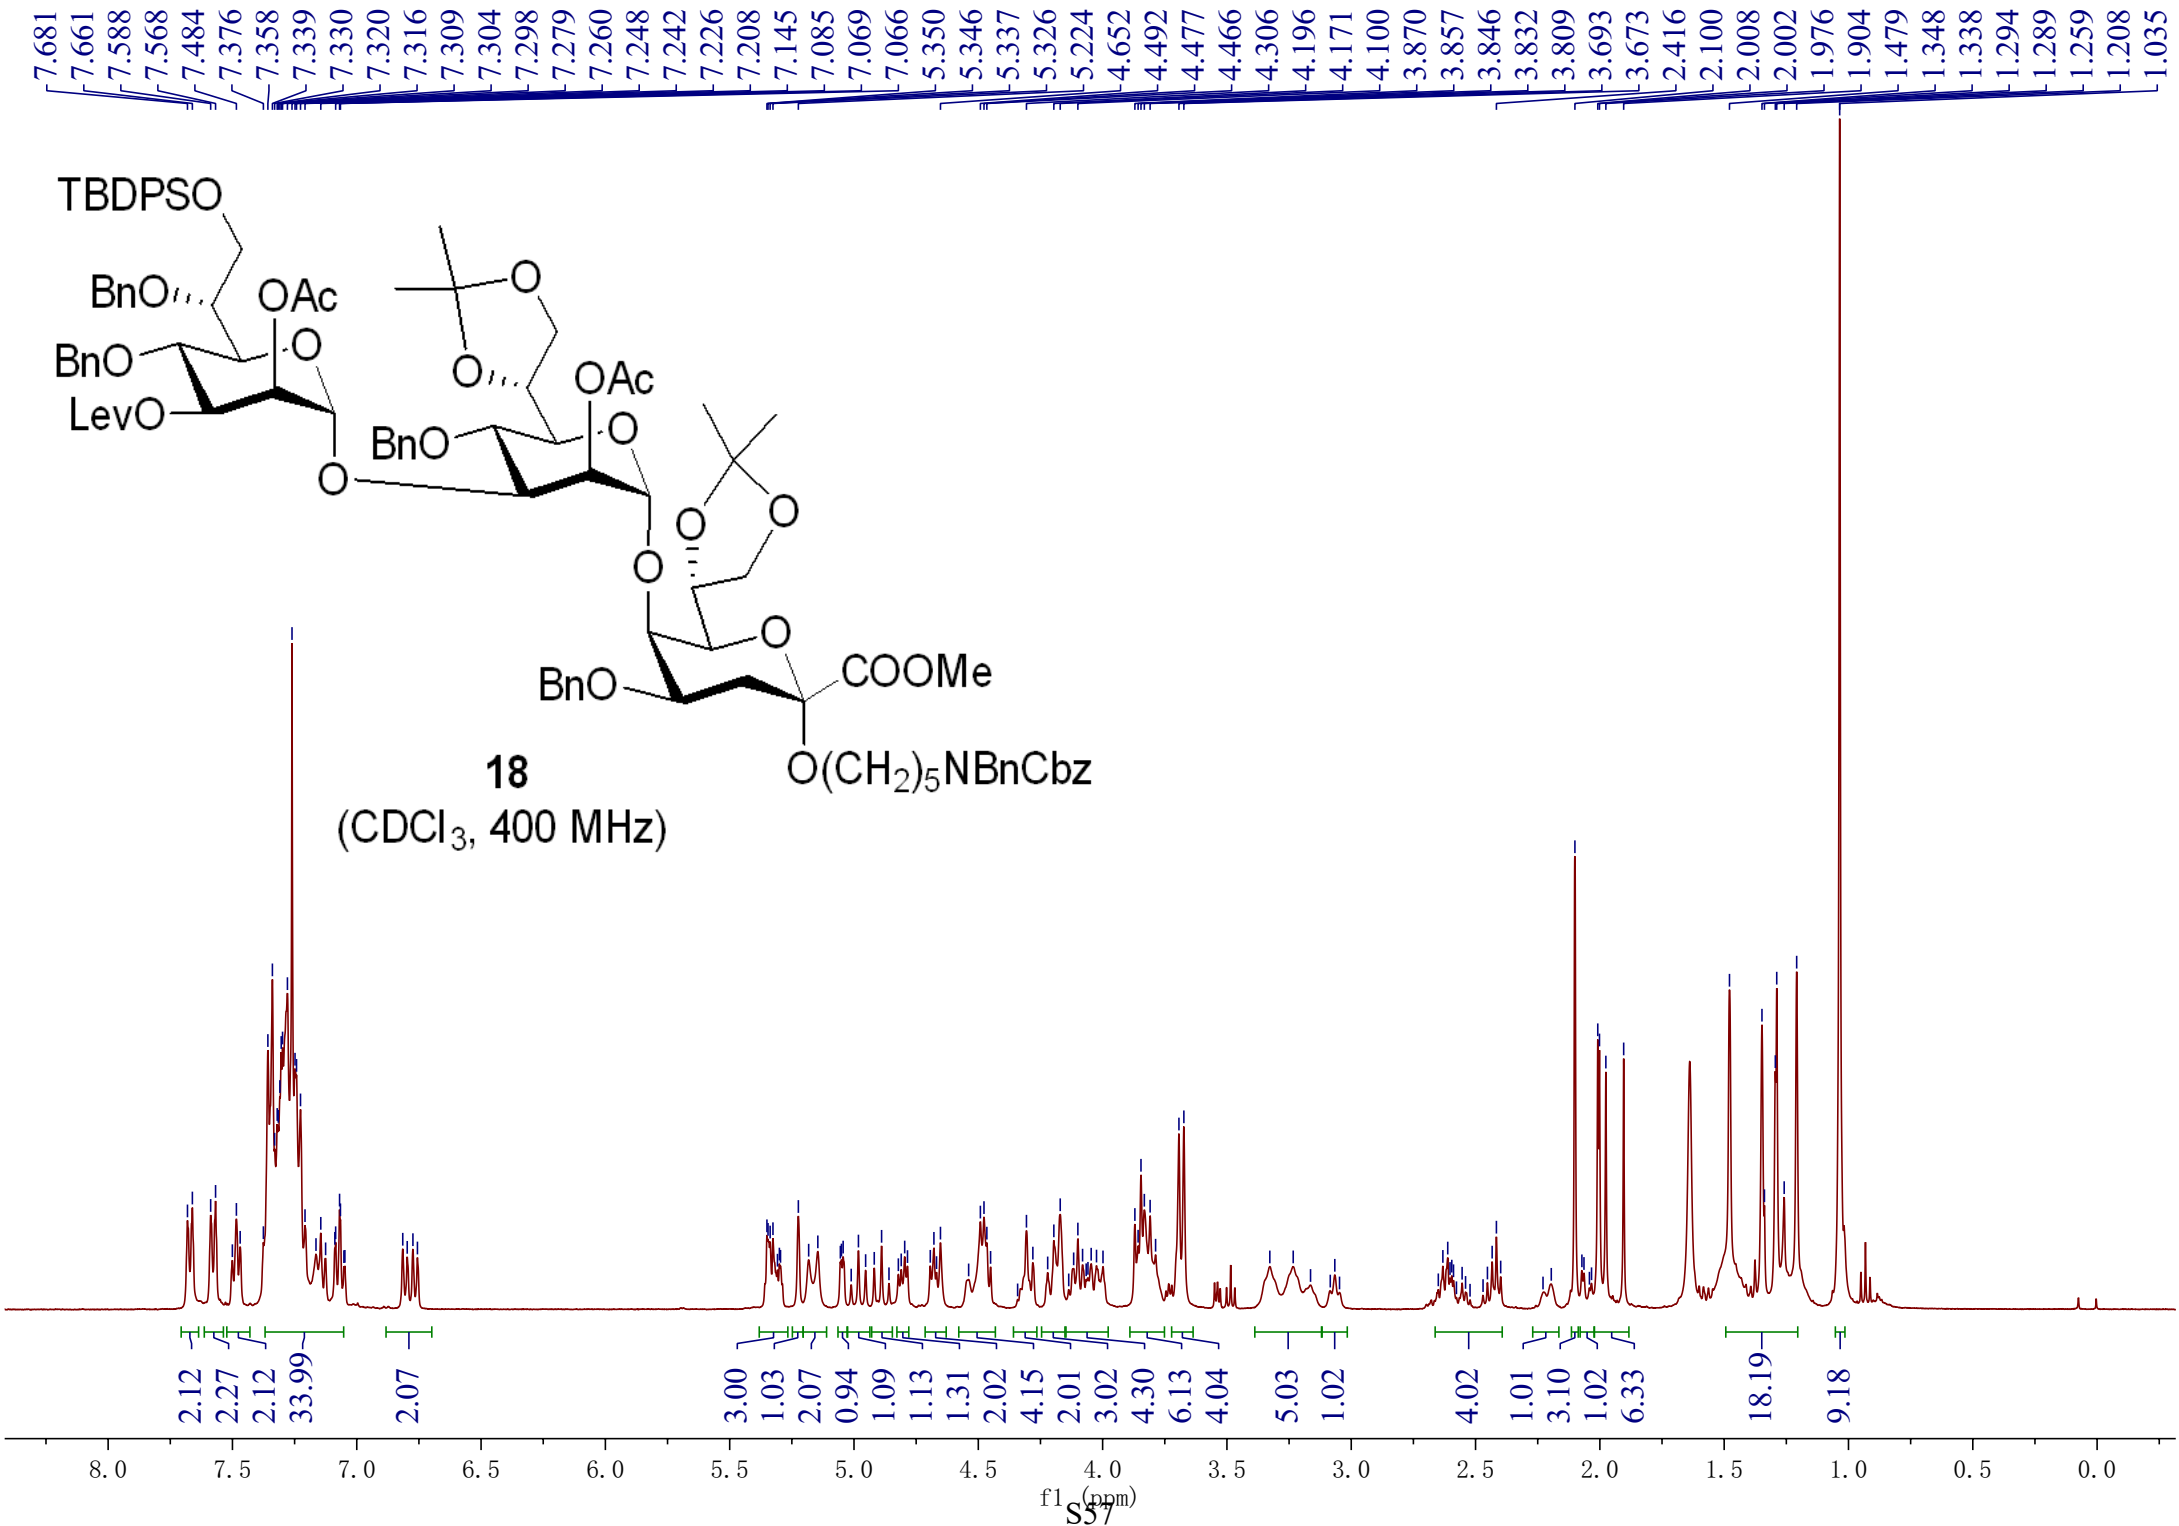

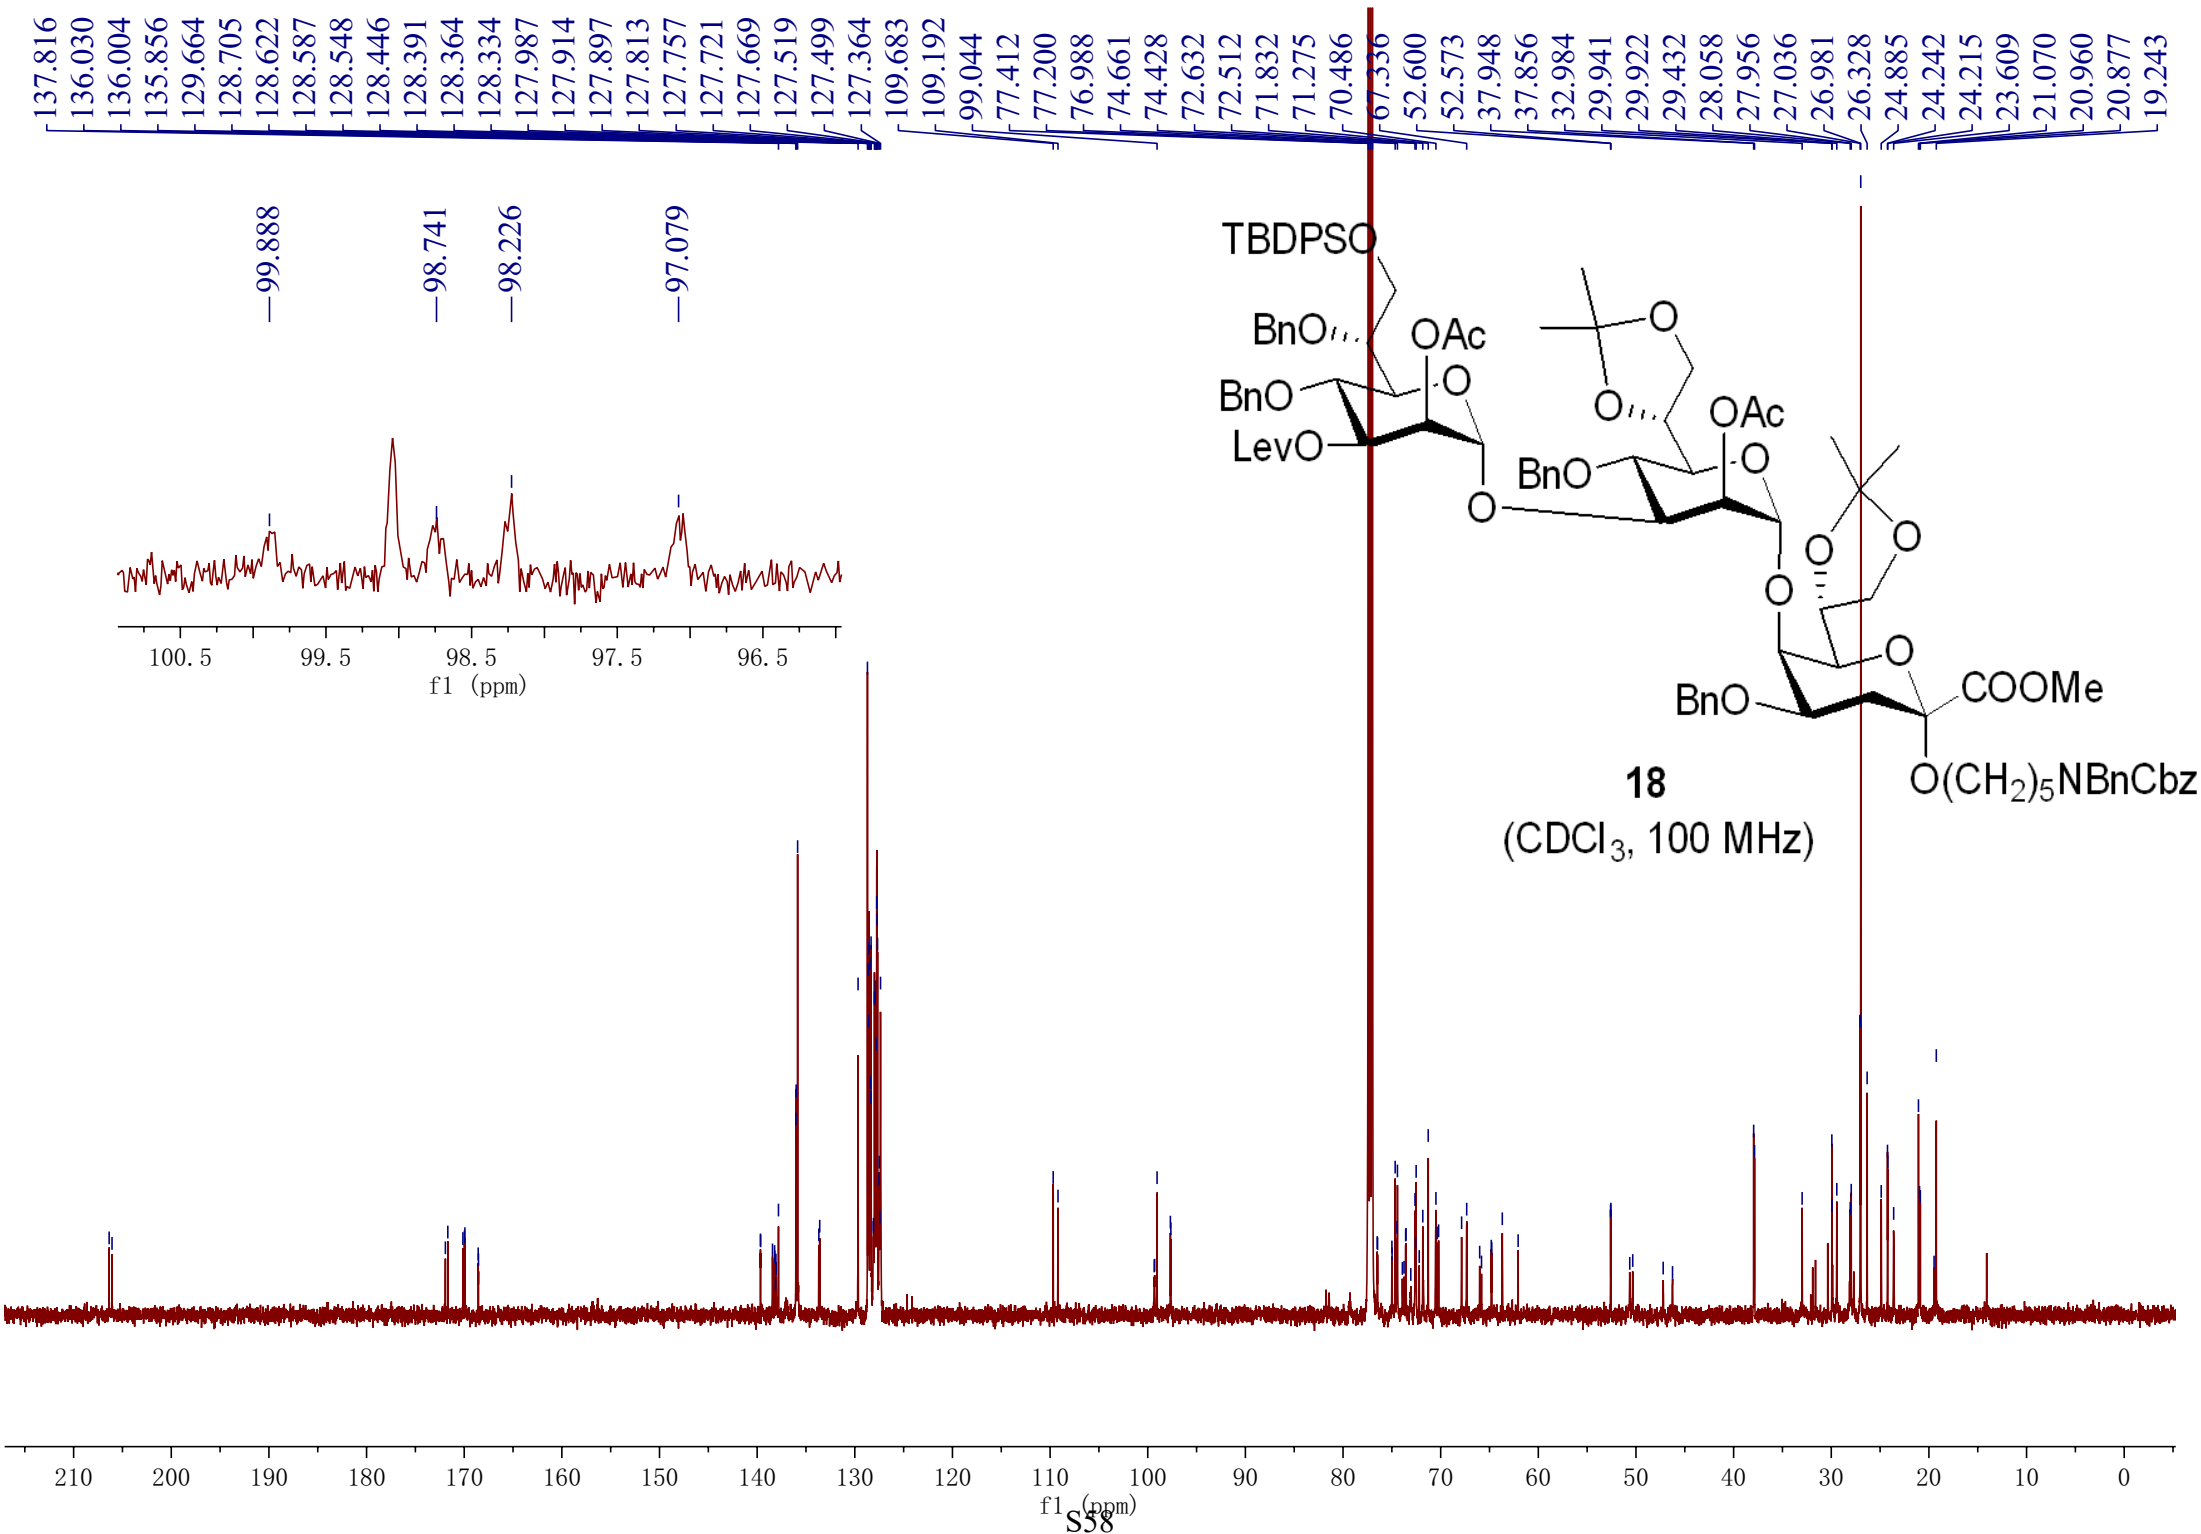

Supplement: d4ob00182f1.pdf [file d4ob00182f1.pdf]
